# Supplementary material for: Gene Expression Patterns in Pancreatic Tumors, Cells and Tissues
Source: PLoS One. 2007 Mar 28;2(3):e323. doi: 10.1371/journal.pone.0000323 (PMC1824711; doi:10.1371/journal.pone.0000323)
Supplement: Data S4 — List of genes differentially expressed between primary pancreatic duct cells and whole normal pancreatic tissue obtained using SAM as described in the Methods. (2.12 MB XLS) [file pone.0000323.s004.xls]

## Sheet: SAM for Pancreatic ducts 
Supplement 4 - Genes differentially expressed in ducts compared to normal whole pancreas from organ donors
SAM list of genes whose expression are significantly positive or negative by at least 3-fold.
Input parameters
Data type?		Two class unpaired
Arrays centered?		FALSE
Delta		1.40115
Minimum fold change		3
Test statistic		standard
Are data are log scale?		TRUE
Number of permutations		200
Input percentile for exchangeability factor s0		Automatic choice
Number of neighbors for KNN		10
Seed for Random number generator		1234567
Computed values
Estimate of pi0 (proportion of null genes)		0.398202
Exchangibility factor s0		0.167582
s0 percentile		5.00397
False Discovery Rate (%)		0.0539569
List of Significant Genes for Delta = 1.401
				Positive genes (737)
	Gene ID	Gene Name	Score(d)	Numerator(r)	Denominator(s+s0)	Fold Change	q-value(%)	localfdr(%)
	COL4A5 || Collagen, type IV, alpha 5 (Alport syndrome) || 308452	IMAGE:1592039	11.1199	3.92089	0.3526	15.452	0	0.0102718
	|| CDNA clone IMAGE:6025865, partial cds || 226507	IMAGE:1457276	10.8119	4.59047	0.424576	23.7435	0	0.0277787
	GALNT5 || UDP-N-acetyl-alpha-D-galactosamine:polypeptide N-acetylgalactosaminyltransferase 5 (GalNAc-T5) || 220142	IMAGE:460002	9.97973	5.80256	0.581435	51.8705	0	0.0730661
	FHL2 || Four and a half LIM domains 2 || 222391	IMAGE:1606557	9.85922	3.70911	0.376207	12.8364	0	0.0788027
	LAMA3 || Laminin, alpha 3 || 102913	IMAGE:362059	9.43892	3.00524	0.318389	8.18527	0	0.0945147
	ITGB4 || Integrin, beta 4 || 100196	IMAGE:526134	9.40701	4.33933	0.461287	18.8471	0	0.0953229
	DCBLD2 || Discoidin, CUB and LCCL domain containing 2 || 98455	IMAGE:838736	9.23281	3.72603	0.403564	12.7809	0	0.0984479
	SLC2A1 || Solute carrier family 2 (facilitated glucose transporter), member 1 || 102645	IMAGE:207358	9.00203	4.09378	0.454762	16.0634	0	0.0983344
	DCBLD2 || Discoidin, CUB and LCCL domain containing 2 || 115972	IMAGE:782460	8.77057	3.78456	0.431506	14.0326	0	0.0917791
	AREG || Amphiregulin (schwannoma-derived growth factor) || 104132	IMAGE:1410444	8.70505	6.92111	0.795068	84.334	0	0.0884979
	ANTXR2 || Anthrax toxin receptor 2 || 101777	IMAGE:76169	8.66357	3.60011	0.415546	12.3402	0	0.0860522
	CTEN || C-terminal tensin-like || 310233	IMAGE:136052	8.29376	3.40048	0.410004	10.1102	0	0.0493416
	VEGFC || Vascular endothelial growth factor C || 108849	IMAGE:45138	8.16237	2.83556	0.347393	7.30674	0	0.0286367
	DKK1 || Dickkopf homolog 1 (Xenopus laevis) || 101469	IMAGE:669375	8.02841	4.98922	0.621446	29.4906	0	0.00261703
	HBEGF || Heparin-binding EGF-like growth factor || 109560	IMAGE:35828	7.94259	3.63371	0.457497	12.1112	0	0
	DHRS9 || Dehydrogenase/reductase (SDR family) member 9 || 225315	IMAGE:1031994	7.92098	5.81244	0.733804	51.5147	0	0
	RAC2 || Ras-related C3 botulinum toxin substrate 2 (rho family, small GTP binding protein Rac2) || 114359	IMAGE:827132	7.8796	4.90067	0.621944	24.3761	0	0
	MGLL || Monoglyceride lipase || 111083	IMAGE:81394	7.8674	3.426	0.435468	10.3215	0	0
	HS6ST1 || Heparan sulfate 6-O-sulfotransferase 1 || 307583	IMAGE:969769	7.80265	3.71858	0.476579	13.8787	0	0
	CDA || Cytidine deaminase || 309527	IMAGE:1551030	7.79825	3.63485	0.466111	12.7036	0	0
	|| || 109007	IMAGE:1983884	7.75257	4.00031	0.515998	15.4009	0	0
	SLC16A3 || Solute carrier family 16 (monocarboxylic acid transporters), member 3 || 100686	IMAGE:502151	7.66344	4.75167	0.620043	22.5587	0	0
	ROPN1L || Ropporin 1-like || 117186	IMAGE:795446	7.64507	4.61978	0.604282	22.1464	0	0
	|| Transcribed locus, moderately similar to NP_062644.1 diaphanous homolog 3 (Drosophila) [Mus musculus] || 317904	IMAGE:1881517	7.60045	3.51467	0.462429	11.327	0	0
	GATA3 || GATA binding protein 3 || 116219	IMAGE:214068	7.55551	3.35344	0.443841	10.47	0	0
	NT5E || 5'-nucleotidase, ecto (CD73) || 310325	IMAGE:271978	7.52817	4.11544	0.546673	17.0386	0	0
	ANXA1 || Annexin A1 || 99254	IMAGE:208718	7.48341	4.15711	0.555511	16.6289	0	0
	|| Hypothetical gene supported by BC034933; BC068085 || 220967	IMAGE:1257131	7.36753	3.06618	0.416175	7.92831	0	0
	PLAT || Plasminogen activator, tissue || 114914	IMAGE:813841	7.34349	4.629	0.630354	23.881	0	0
	SGCD || Sarcoglycan, delta (35kDa dystrophin-associated glycoprotein) || 226173	IMAGE:469898	7.22962	3.12854	0.43274	8.8505	0	0
	PLAU || Plasminogen activator, urokinase || 110389	IMAGE:714106	7.18979	4.50322	0.626336	21.5199	0	0
	SLC2A1 || Solute carrier family 2 (facilitated glucose transporter), member 1 || 222483	IMAGE:25389	7.15377	4.67056	0.65288	20.3719	0	0
	ADAM15 || A disintegrin and metalloproteinase domain 15 (metargidin) || 114442	IMAGE:713782	7.09918	2.60856	0.367445	6.0645	0	0
	FER1L3 || Fer-1-like 3, myoferlin (C. elegans) || 312770	IMAGE:810441	7.00848	3.08856	0.440689	8.29006	0	0
	KYNU || Kynureninase (L-kynurenine hydrolase) || 313117	IMAGE:2298080	6.99527	3.5577	0.508586	13.0215	0	0
	D2S448 || Melanoma associated gene || 309831	IMAGE:2012757	6.96659	2.809	0.40321	6.79007	0	0
	BCAR3 || Breast cancer anti-estrogen resistance 3 || 224032	IMAGE:279670	6.95278	3.34011	0.4804	9.7559	0	0
	OCIAD2 || OCIA domain containing 2 || 99647	IMAGE:810218	6.94428	2.82068	0.406187	7.09743	0	0
	COL17A1 || Collagen, type XVII, alpha 1 || 115215	IMAGE:501981	6.89943	4.49516	0.651527	22.3777	0	0
	ZNF185 || Zinc finger protein 185 (LIM domain) || 224786	IMAGE:855079	6.84262	3.15456	0.461016	9.39193	0	0
	RALA || V-ral simian leukemia viral oncogene homolog A (ras related) || 109274	IMAGE:230261	6.83869	3.156	0.461492	9.18697	0	0
	HSGT1 || Suppressor of S. cerevisiae gcr2 || 249100	IMAGE:25154	6.82414	3.31519	0.485802	10.1138	0	0
	FER1L3 || Fer-1-like 3, myoferlin (C. elegans) || 318527	IMAGE:589320	6.79259	3.02378	0.445158	7.77188	0	0
	GPCR5A || G protein-coupled receptor, family C, group 5, member A || 110876	IMAGE:595037	6.77796	4.21337	0.621627	18.3547	0	0
	|| || 309605	IMAGE:1606865	6.7693	2.30011	0.339786	4.93477	0	0
	APOE || Apolipoprotein E || 117656	IMAGE:753610	6.70613	3.59322	0.535812	11.0625	0	0
	UBE2C || Ubiquitin-conjugating enzyme E2C || 223871	IMAGE:146882	6.64604	3.196	0.480888	9.6613	0	0
	ARHE || Rho family GTPase 3 || 102204	IMAGE:784593	6.62491	2.85689	0.431235	7.31386	0	0
	IFI27 || Interferon, alpha-inducible protein 27 || 102169	IMAGE:588915	6.57297	3.53678	0.538079	13.9095	0	0
	ADAM8 || A disintegrin and metalloproteinase domain 8 || 101243	IMAGE:704254	6.55742	2.85602	0.435541	6.9695	0	0
	GATA3 || GATA binding protein 3 || 101778	IMAGE:135118	6.55711	3.86156	0.588911	13.7299	0	0
	MLPH || Melanophilin || 224276	IMAGE:1558642	6.48924	3.25378	0.501411	9.10417	0	0
	NT5E || 5'-nucleotidase, ecto (CD73) || 116156	IMAGE:42070	6.45398	2.86789	0.44436	7.09068	0	0
	HS3ST1 || Heparan sulfate (glucosamine) 3-O-sulfotransferase 1 || 101319	IMAGE:220372	6.41962	3.17953	0.495283	8.87913	0	0
	KYNU || Kynureninase (L-kynurenine hydrolase) || 100002	IMAGE:252515	6.37814	4.38778	0.68794	18.7031	0	0
	PTTG1 || Pituitary tumor-transforming 1 || 311002	IMAGE:2018976	6.35801	2.761	0.434255	7.0682	0	0
	PLEC1 || Plectin 1, intermediate filament binding protein 500kDa || 107211	IMAGE:781362	6.3224	3.008	0.475768	7.62874	0	0
	OSBPL10 || Oxysterol binding protein-like 10 || 105371	IMAGE:842762	6.30755	2.61071	0.413903	5.8442	0	0
	HN1 || Hematological and neurological expressed 1 || 221265	IMAGE:471568	6.29722	3.72237	0.591113	12.2579	0	0
	|| || 102831	IMAGE:810754	6.28525	3.383	0.538244	10.3344	0	0
	|| Transcribed locus || 104254	IMAGE:1323737	6.28273	2.67089	0.425116	5.99432	0	0
	D2S448 || Melanoma associated gene || 117526	IMAGE:345601	6.26474	3.153	0.503293	8.35491	0	0
	BACH || Brain acyl-CoA hydrolase || 116601	IMAGE:782826	6.2497	2.51511	0.402437	5.6763	0	0
	PRRG1 || Proline rich Gla (G-carboxyglutamic acid) 1 || 104061	IMAGE:268188	6.22769	2.99743	0.481306	7.42487	0	0
	LCN2 || Lipocalin 2 (oncogene 24p3) || 106668	IMAGE:741497	6.19331	5.561	0.897905	28.2788	0	0
	HN1 || Hematological and neurological expressed 1 || 99387	IMAGE:795803	6.11053	3.84878	0.62986	12.467	0	0
	TPX2 || TPX2, microtubule-associated protein homolog (Xenopus laevis) || 310388	IMAGE:1540227	6.09127	3.64114	0.597764	13.227	0	0
	RALA || V-ral simian leukemia viral oncogene homolog A (ras related) || 100960	IMAGE:260768	6.04808	2.34011	0.386918	4.93678	0	0
	TTYH3 || Tweety homolog 3 (Drosophila) || 116071	IMAGE:248256	6.03965	3.43898	0.569399	9.66245	0	0
	COL17A1 || Collagen, type XVII, alpha 1 || 112324	IMAGE:252259	6.02209	3.32133	0.551525	9.11494	0	0
	|| || 117789	IMAGE:509823	6.01671	4.19277	0.696854	16.2019	0	0
	C10orf3 || Chromosome 10 open reading frame 3 || 116712	IMAGE:504308	5.99464	4.25978	0.710598	17.2067	0	0
	MYO1E || Myosin IE || 110556	IMAGE:470128	5.96427	2.41222	0.404446	5.1562	0	0
	NUSAP1 || Nucleolar and spindle associated protein 1 || 114041	IMAGE:951241	5.96144	2.73364	0.458554	6.47639	0	0
	KCNK1 || Potassium channel, subfamily K, member 1 || 101119	IMAGE:288896	5.94505	2.71333	0.456402	6.70408	0	0
	SPRR1B || Small proline-rich protein 1B (cornifin) || 115389	IMAGE:813614	5.93385	3.48844	0.587888	11.005	0	0
	GPR126 || G protein-coupled receptor 126 || 224655	IMAGE:259884	5.85435	3.098	0.529179	9.29471	0	0
	EPLIN || Epithelial protein lost in neoplasm beta || 100145	IMAGE:841415	5.83241	2.29784	0.393977	4.80164	0	0
	ATP2B4 || ATPase, Ca++ transporting, plasma membrane 4 || 115107	IMAGE:502326	5.82644	2.70267	0.463862	6.53216	0	0
	CAV1 || Caveolin 1, caveolae protein, 22kDa || 114580	IMAGE:841664	5.80309	2.49378	0.429733	5.48426	0	0
	GGA2 || Golgi associated, gamma adaptin ear containing, ARF binding protein 2 || 308638	IMAGE:1635695	5.76208	1.96956	0.341813	3.87631	0	0
	TMEM33 || Transmembrane protein 33 || 319087	IMAGE:1874158	5.75369	2.5	0.434504	5.88954	0	0
	CAPN2 || Calpain 2, (m/II) large subunit || 116918	IMAGE:549728	5.74204	2.50056	0.435482	5.27165	0	0
	OSBPL3 || Oxysterol binding protein-like 3 || 223238	IMAGE:824212	5.73606	2.20899	0.385106	4.8021	0	0
	C20orf24 || Chromosome 20 open reading frame 24 || 308553	IMAGE:1605321	5.71974	2.62511	0.458957	6.18666	0	0
	LMO7 || LIM domain 7 || 106357	IMAGE:51582	5.71585	3.33211	0.58296	9.497	0	0
	HMGA1 || High mobility group AT-hook 1 || 109301	IMAGE:782811	5.70076	2.76522	0.485062	6.60782	0	0
	ZNF286 || Zinc finger protein 286 || 116125	IMAGE:810600	5.64586	2.48389	0.439948	5.62731	0	0
	GYPC || **Glycophorin C (Gerbich blood group) || 101161	IMAGE:284619	5.64206	2.42468	0.42975	5.08327	0	0
	CDH2 || Cadherin 2, type 1, N-cadherin (neuronal) || 109288	IMAGE:325182	5.62897	3.11544	0.553466	7.84506	0	0
	ITGA3 || Integrin, alpha 3 (antigen CD49C, alpha 3 subunit of VLA-3 receptor) || 105229	IMAGE:726144	5.62891	3.31178	0.588351	8.32814	0	0
	AP2B1 || Adaptor-related protein complex 2, beta 1 subunit || 100752	IMAGE:245853	5.62226	2.82889	0.503159	6.63976	0	0
	DCBLD2 || Discoidin, CUB and LCCL domain containing 2 || 111367	IMAGE:263200	5.61367	2.37851	0.4237	5.06137	0	0
	CCND1 || Cyclin D1 (PRAD1: parathyroid adenomatosis 1) || 104326	IMAGE:841641	5.60008	2.115	0.377673	4.19782	0	0
	MMP14 || Matrix metalloproteinase 14 (membrane-inserted) || 101816	IMAGE:270505	5.58249	3.73756	0.669514	11.2114	0	0
	ITGA2 || Integrin, alpha 2 (CD49B, alpha 2 subunit of VLA-2 receptor) || 106908	IMAGE:525246	5.58228	4.10967	0.736199	13.414	0	0
	EGFR || Epidermal growth factor receptor (erythroblastic leukemia viral (v-erb-b) oncogene homolog, avian) || 114642	IMAGE:669485	5.58009	2.6	0.465943	5.67969	0	0
	CORO1C || Coronin, actin binding protein, 1C || 102427	IMAGE:813490	5.55713	2.36144	0.424939	4.83942	0	0
	AKAP12 || A kinase (PRKA) anchor protein (gravin) 12 || 101310	IMAGE:784772	5.53972	2.99189	0.54008	7.60855	0	0
	NT5E || 5'-nucleotidase, ecto (CD73) || 223483	IMAGE:281892	5.52332	1.78134	0.322513	3.37992	0	0
	PFKP || Phosphofructokinase, platelet || 104988	IMAGE:950682	5.51896	3.21178	0.581954	8.01591	0	0
	ADAM9 || A disintegrin and metalloproteinase domain 9 (meltrin gamma) || 114650	IMAGE:204257	5.5154	2.93179	0.531564	7.37604	0	0
	LRRC8 || Leucine rich repeat containing 8 || 226072	IMAGE:487433	5.49066	2.46889	0.449652	5.27091	0	0
	|| || 311398	IMAGE:1892526	5.46537	2.69089	0.492353	6.1294	0	0
	HK2 || Hexokinase 2 || 220846	IMAGE:1637282	5.46182	3.23111	0.591581	9.54739	0	0
	SLC2A1 || Solute carrier family 2 (facilitated glucose transporter), member 1 || 225990	IMAGE:453589	5.45591	3.84326	0.704423	11.9193	0	0
	ITGA2 || Integrin, alpha 2 (CD49B, alpha 2 subunit of VLA-2 receptor) || 101540	IMAGE:811740	5.4459	3.43144	0.630097	9.39149	0	0
	PLAUR || Plasminogen activator, urokinase receptor || 107648	IMAGE:810017	5.43979	3.55822	0.65411	9.38175	0	0
	ANLN || Anillin, actin binding protein (scraps homolog, Drosophila) || 307638	IMAGE:128711	5.43637	3.61067	0.664169	16.5022	0	0
	LOC58489 || **Hypothetical protein from EUROIMAGE 588495 || 220955	IMAGE:257323	5.41841	2.49889	0.461185	5.94057	0	0
	CD47 || **CD47 antigen (Rh-related antigen, integrin-associated signal transducer) || 101681	IMAGE:513077	5.41201	2.45111	0.452902	5.38175	0	0
	|| || 99502	IMAGE:1337808	5.37887	2.81122	0.522642	6.27884	0	0
	TNFRSF25 || Tumor necrosis factor receptor superfamily, member 25 || 100185	IMAGE:345586	5.37776	2.11511	0.393307	4.29788	0	0
	EPHA2 || EPH receptor A2 || 118742	IMAGE:241530	5.36723	2.79744	0.521208	6.14905	0	0
	AMIGO2 || Amphoterin induced gene 2 || 220186	IMAGE:253884	5.36011	2.30533	0.430091	4.82809	0	0
	INPP4B || Inositol polyphosphate-4-phosphatase, type II, 105kDa || 107393	IMAGE:165857	5.34253	2.38328	0.446096	5.68714	0	0
	MELK || Maternal embryonic leucine zipper kinase || 226162	IMAGE:1517595	5.32746	3.70604	0.69565	15.227	0	0
	MAL2 || Mal, T-cell differentiation protein 2 || 109182	IMAGE:376941	5.31208	2.47067	0.465104	5.7935	0	0
	AKT1 || **V-akt murine thymoma viral oncogene homolog 1 || 104714	IMAGE:810331	5.30756	2.17722	0.410212	4.4255	0	0
	ERO1L || ERO1-like (S. cerevisiae) || 103938	IMAGE:625875	5.30052	2.53995	0.479189	5.5686	0	0
	C7orf30 || **Chromosome 7 open reading frame 30 || 114149	IMAGE:429494	5.29949	2.034	0.38381	4.15017	0	0
	LAMC2 || Laminin, gamma 2 || 113623	IMAGE:460403	5.29471	3.6892	0.696772	9.78995	0	0
	CDK7 || Cyclin-dependent kinase 7 (MO15 homolog, Xenopus laevis, cdk-activating kinase) || 104251	IMAGE:470621	5.27441	3.99867	0.758126	10.2373	0	0
	SEMA3A || Sema domain, immunoglobulin domain (Ig), short basic domain, secreted, (semaphorin) 3A || 120285	IMAGE:24061	5.26898	3.91201	0.742461	12.3962	0	0
	KIAA1609 || KIAA1609 protein || 119439	IMAGE:665384	5.26122	1.8994	0.361019	3.71363	0	0
	|| Transcribed locus || 99999	IMAGE:342456	5.26059	2.69772	0.512817	5.76131	0	0
	KLF4 || Kruppel-like factor 4 (gut) || 110999	IMAGE:188232	5.25851	1.787	0.33983	3.40182	0	0
	RoXaN || Rotavirus X protein associated with NSP3 || 308723	IMAGE:1571873	5.23773	1.86133	0.35537	3.65508	0	0
	SDC1 || Syndecan 1 || 119785	IMAGE:525926	5.2369	2.34711	0.448187	4.80031	0	0
	DUSP6 || Dual specificity phosphatase 6 || 105235	IMAGE:854899	5.22804	2.71664	0.51963	6.16318	0	0
	JUB || Jub, ajuba homolog (Xenopus laevis) || 116116	IMAGE:812974	5.22406	1.84803	0.353754	3.63063	0	0
	STMN1 || Stathmin 1/oncoprotein 18 || 102547	IMAGE:1476065	5.21188	2.42756	0.465773	5.3336	0	0
	PYGL || Phosphorylase, glycogen; liver (Hers disease, glycogen storage disease type VI) || 104842	IMAGE:241705	5.2078	2.32992	0.447391	4.80779	0	0
	TAP1 || Transporter 1, ATP-binding cassette, sub-family B (MDR/TAP) || 118457	IMAGE:841340	5.17723	2.45822	0.474815	5.03272	0	0
	S100A2 || S100 calcium binding protein A2 || 98494	IMAGE:810813	5.17701	2.11942	0.409391	4.44118	0	0
	F2RL1 || Coagulation factor II (thrombin) receptor-like 1 || 112440	IMAGE:811899	5.17423	2.16289	0.418011	4.47315	0	0
	PARP4 || Poly (ADP-ribose) polymerase family, member 4 || 115673	IMAGE:753987	5.16789	1.73211	0.335168	3.28106	0	0
	SFN || Stratifin || 309387	IMAGE:2027515	5.16536	1.72756	0.33445	3.24701	0	0
	CDH3 || Cadherin 3, type 1, P-cadherin (placental) || 103348	IMAGE:773301	5.1486	2.85363	0.554254	7.65138	0	0
	ASF1B || ASF1 anti-silencing function 1 homolog B (S. cerevisiae) || 120021	IMAGE:295710	5.14719	2.29311	0.445508	5.06524	0	0
	ITGA3 || Integrin, alpha 3 (antigen CD49C, alpha 3 subunit of VLA-3 receptor) || 107957	IMAGE:755402	5.14268	2.79432	0.54336	6.27223	0	0
	ELK3 || ELK3, ETS-domain protein (SRF accessory protein 2) || 306961	IMAGE:1550776	5.13395	2.01807	0.393084	3.93486	0	0
	|| Transcribed locus || 310401	IMAGE:38925	5.12107	2.42399	0.473336	5.53643	0	0
	SERPINB2 || Serine (or cysteine) proteinase inhibitor, clade B (ovalbumin), member 2 || 109746	IMAGE:70692	5.10651	3.10133	0.60733	7.2893	0	0
	UBE2E1 || **Ubiquitin-conjugating enzyme E2E 1 (UBC4/5 homolog, yeast) || 226541	IMAGE:50264	5.08209	1.96733	0.387111	4.18968	0	0
	DKFZp779O175 || Hypothetical protein DKFZp779O175 || 221880	IMAGE:745283	5.07913	2.38767	0.470093	4.98987	0	0
	SIAT7A || ST6 (alpha-N-acetyl-neuraminyl-2,3-beta-galactosyl-1,3)-N-acetylgalactosaminide alpha-2,6-sialyltransferase 1 || 221061	IMAGE:1418621	5.07762	3.47101	0.683589	12.7856	0	0
	DNAJC9 || **DnaJ (Hsp40) homolog, subfamily C, member 9 || 227097	IMAGE:32134	5.07088	1.78494	0.351998	3.49742	0	0
	|| Transcribed locus || 316875	IMAGE:1950150	5.06853	2.02862	0.400238	3.96825	0	0
	RGS19IP1 || Regulator of G-protein signalling 19 interacting protein 1 || 116696	IMAGE:770614	5.06557	2.23344	0.440907	4.42101	0	0
	PPARG || Peroxisome proliferative activated receptor, gamma || 102205	IMAGE:511832	5.06167	1.72456	0.340709	3.31302	0	0
	|| || 307847	IMAGE:814818	5.04601	2.53256	0.501893	5.38645	0	0
	KRT13 || Keratin 13 || 107789	IMAGE:327676	5.03637	2.30335	0.457343	4.68148	0	0
	|| CDNA clone IMAGE:4514712, partial cds || 118499	IMAGE:667883	5.02991	2.98733	0.593914	7.22932	0	0
	DKFZP434C245 || WD repeat domain 51A || 226272	IMAGE:462333	5.02389	1.85822	0.369877	3.50942	0	0
	LMO7 || LIM domain 7 || 98897	IMAGE:429186	5.01551	2.55047	0.508517	5.93759	0	0
	KAB || KARP-1-binding protein || 100524	IMAGE:609377	5.01508	2.67065	0.532525	6.06283	0	0
	DGKH || Diacylglycerol kinase, eta || 224202	IMAGE:280831	5.00487	1.89382	0.378395	3.70702	0	0
	PTRF || Polymerase I and transcript release factor || 118994	IMAGE:809473	4.99248	2.344	0.469507	4.70452	0	0
	CCND1 || Cyclin D1 (PRAD1: parathyroid adenomatosis 1) || 228984	IMAGE:113856	4.99109	2.29822	0.460465	4.61462	0	0
	CINP || **Cyclin-dependent kinase 2-interacting protein || 114764	IMAGE:1636580	4.98812	2.02167	0.405296	4.22563	0	0
	ARHGEF2 || Rho/rac guanine nucleotide exchange factor (GEF) 2 || 104819	IMAGE:810567	4.977	1.99533	0.400911	3.89814	0	0
	RGS19IP1 || Regulator of G-protein signalling 19 interacting protein 1 || 111272	IMAGE:1492426	4.9735	1.93789	0.389643	3.71058	0	0
	C1orf2 || Chromosome 1 open reading frame 2 || 103517	IMAGE:47665	4.9683	1.60044	0.322131	3.04281	0	0
	|| || 223881	IMAGE:700500	4.96498	1.76722	0.355938	3.34606	0	0
	|| T-cell receptor rearranged beta-chain V-region (V-D-J) || 107377	IMAGE:80186	4.96209	2.83922	0.572183	5.83721	0	0
	FST || Follistatin || 319580	IMAGE:1883559	4.95953	3.903	0.78697	22.0245	0	0
	FER1L3 || Fer-1-like 3, myoferlin (C. elegans) || 108102	IMAGE:161992	4.95722	4.41789	0.891203	16.1578	0	0
	JAG1 || Jagged 1 (Alagille syndrome) || 107270	IMAGE:141815	4.95115	1.95911	0.395688	3.70919	0	0
	TMOD3 || Tropomodulin 3 (ubiquitous) || 225767	IMAGE:449044	4.94256	2.06367	0.41753	4.20212	0	0
	NR2F2 || Nuclear receptor subfamily 2, group F, member 2 || 310010	IMAGE:377384	4.93835	2.35889	0.477668	4.85675	0	0
	MAP4K4 || Mitogen-activated protein kinase kinase kinase kinase 4 || 225221	IMAGE:746229	4.93444	2.62867	0.532718	5.5388	0	0
	BAIAP2 || BAI1-associated protein 2 || 119284	IMAGE:42271	4.93344	1.94218	0.393676	3.75901	0	0
	NUSAP1 || Nucleolar and spindle associated protein 1 || 228997	IMAGE:2327739	4.92931	3.58514	0.72731	12.8942	0	0
	IQGAP1 || IQ motif containing GTPase activating protein 1 || 309388	IMAGE:754149	4.92126	1.87967	0.381949	3.55549	0	0
	|| || 112361	IMAGE:166805	4.92007	2.54789	0.517856	5.21226	0	0
	XRCC4 || X-ray repair complementing defective repair in Chinese hamster cells 4 || 101635	IMAGE:26811	4.91131	2.11267	0.430164	4.15932	0	0
	DKFZp547A023 || Hypothetical protein DKFZp547A023 || 103634	IMAGE:813157	4.87777	1.69258	0.346999	3.17085	0	0
	GARS || Glycyl-tRNA synthetase || 106548	IMAGE:884655	4.87702	1.61067	0.330257	3.02954	0	0
	TGFBI || Transforming growth factor, beta-induced, 68kDa || 113722	IMAGE:868212	4.86502	2.64522	0.543722	5.86981	0	0
	RRAS2 || Related RAS viral (r-ras) oncogene homolog 2 || 119086	IMAGE:130100	4.8648	1.82411	0.374961	3.58942	0	0
	LOC157567 || Hypothetical protein LOC157567 || 222476	IMAGE:449112	4.85856	2.50022	0.514601	4.96694	0	0
	|| **Similar to D(1B) dopamine receptor (D(5) dopamine receptor) (D1beta dopamine receptor) || 118496	IMAGE:143306	4.85849	2.12144	0.436647	4.3486	0	0
	SLC39A10 || Solute carrier family 39 (zinc transporter), member 10 || 102802	IMAGE:754311	4.8513	1.93522	0.398908	3.8865	0	0
	SLC9A1 || Solute carrier family 9 (sodium/hydrogen exchanger), isoform 1 (antiporter, Na+/H+, amiloride sensitive) || 99679	IMAGE:812227	4.84989	1.9312	0.398195	3.68944	0	0
	EFNB1 || Ephrin-B1 || 100751	IMAGE:756968	4.83237	1.87189	0.387364	3.70649	0	0
	TMSB10 || Thymosin, beta 10 || 106666	IMAGE:840788	4.82702	2.51578	0.521187	5.35685	0	0
	STK6 || Serine/threonine kinase 6 || 163308	IMAGE:209066	4.8259	2.91611	0.604263	9.04123	0	0
	|| || 227068	IMAGE:1474390	4.8198	2.60756	0.541009	6.38021	0	0
	STK24 || Serine/threonine kinase 24 (STE20 homolog, yeast) || 306926	IMAGE:796599	4.79315	1.85944	0.387938	3.52347	0	0
	CDC2 || Cell division cycle 2, G1 to S and G2 to M || 107303	IMAGE:898286	4.7929	2.47889	0.517201	5.99512	0	0
	COL4A5 || Collagen, type IV, alpha 5 (Alport syndrome) || 113251	IMAGE:470001	4.78735	2.3	0.480432	5.0299	0	0
	PSG11 || **Pregnancy specific beta-1-glycoprotein 11 || 110819	IMAGE:143287	4.78458	3.09087	0.646006	6.957	0	0
	SERPINB7 || Serine (or cysteine) proteinase inhibitor, clade B (ovalbumin), member 7 || 310357	IMAGE:1509935	4.77512	3.10467	0.650176	9.86373	0	0
	KIFC1 || Kinesin family member C1 || 108164	IMAGE:292933	4.77164	2.04375	0.428313	4.27746	0	0
	HKE2 || HLA class II region expressed gene KE2 || 311165	IMAGE:298696	4.76034	2.10711	0.442638	4.3426	0	0
	CYR61 || Cysteine-rich, angiogenic inducer, 61 || 118898	IMAGE:378488	4.74116	2.339	0.493339	4.93627	0	0
	CAV1 || Caveolin 1, caveolae protein, 22kDa || 100059	IMAGE:377461	4.72919	2.35744	0.498488	4.83344	0	0
	MST1R || Macrophage stimulating 1 receptor (c-met-related tyrosine kinase) || 107306	IMAGE:612616	4.70541	2.07357	0.440678	4.29203	0	0
	C14orf31 || Chromosome 14 open reading frame 31 || 101690	IMAGE:796152	4.70294	2.13144	0.453215	4.18872	0	0
	YWHAZ || Tyrosine 3-monooxygenase/tryptophan 5-monooxygenase activation protein, zeta polypeptide || 108507	IMAGE:811166	4.69944	2.76233	0.5878	5.75998	0	0
	FOXA1 || Forkhead box A1 || 99032	IMAGE:84786	4.69747	2.03222	0.432621	3.82726	0	0
	|| CDNA clone IMAGE:4514712, partial cds || 308434	IMAGE:1635066	4.69668	2.17078	0.462195	4.22942	0	0
	PLS3 || Plastin 3 (T isoform) || 226908	IMAGE:1568391	4.68506	1.74656	0.372793	3.2945	0	0
	PAPPA || **Pregnancy-associated plasma protein A, pappalysin 1 || 107737	IMAGE:322806	4.67475	2.52711	0.540587	6.13022	0	0
	P2RY2 || Purinergic receptor P2Y, G-protein coupled, 2 || 105329	IMAGE:141852	4.67044	2.05618	0.440254	4.13317	0	0
	PPP3CA || **Protein phosphatase 3 (formerly 2B), catalytic subunit, alpha isoform (calcineurin A alpha) || 99246	IMAGE:490178	4.65843	1.76723	0.379363	3.41266	0	0
	DDEF2 || Development and differentiation enhancing factor 2 || 116741	IMAGE:298128	4.65834	1.74573	0.374753	3.35842	0	0
	TXNRD1 || Thioredoxin reductase 1 || 119476	IMAGE:789376	4.65059	1.919	0.412636	3.64918	0	0
	ALDH1A3 || Aldehyde dehydrogenase 1 family, member A3 || 119033	IMAGE:814798	4.6493	2.67111	0.57452	5.64322	0	0
	PON2 || Paraoxonase 2 || 107441	IMAGE:781019	4.64631	1.893	0.40742	3.72132	0	0
	HSPG2 || **Heparan sulfate proteoglycan 2 (perlecan) || 113206	IMAGE:770059	4.64453	2.18639	0.470745	4.42972	0	0
	|| Transcribed locus, weakly similar to XP_513462.1 similar to Adenylate kinase isoenzyme 4, mitochondrial (ATP-AMP transphosphorylase) [Pan troglodytes] || 313214	IMAGE:1613496	4.64333	3.38581	0.729177	8.57577	0	0
	CYP2S1 || Cytochrome P450, family 2, subfamily S, polypeptide 1 || 220842	IMAGE:1574926	4.64123	2.34211	0.504631	5.00513	0	0
	|| Full-length cDNA clone CS0DA004YB11 of Neuroblastoma of Homo sapiens (human) || 100505	IMAGE:271748	4.63487	2.25922	0.487441	4.3481	0	0
	SYTL2 || Synaptotagmin-like 2 || 222583	IMAGE:826194	4.63446	2.32844	0.50242	5.73119	0	0
	|| Homo sapiens, Similar to unnamed HERV-H protein, clone IMAGE:3996038, mRNA || 309920	IMAGE:509459	4.62979	2.49811	0.539574	6.13946	0	0
	LIPG || Lipase, endothelial || 116935	IMAGE:67625	4.6254	2.38202	0.514987	4.91905	0	0
	KRT17 || Keratin 17 || 105185	IMAGE:591265	4.61527	3.50278	0.758954	8.54083	0	0
	KIAA0101 || KIAA0101 || 115900	IMAGE:342640	4.61469	2.07622	0.449916	4.18055	0	0
	|| Transcribed locus || 113028	IMAGE:769698	4.61248	1.63656	0.35481	3.01356	0	0
	TMOD3 || Tropomodulin 3 (ubiquitous) || 106298	IMAGE:505203	4.59767	2.21967	0.48278	4.37461	0	0
	AGR2 || Anterior gradient 2 homolog (Xenopus laevis) || 313780	IMAGE:2321113	4.58788	3.71878	0.810566	13.2507	0	0
	LGALS3BP || Lectin, galactoside-binding, soluble, 3 binding protein || 109105	IMAGE:811000	4.58084	2.14356	0.467939	4.1057	0	0
	|| Transcribed locus || 226618	IMAGE:853977	4.57644	2.1147	0.462085	4.08354	0	0
	FLJ10700 || Hypothetical protein FLJ10700 || 110667	IMAGE:767293	4.56707	1.75255	0.383736	3.29377	0	0
	KCNN4 || Potassium intermediate/small conductance calcium-activated channel, subfamily N, member 4 || 100967	IMAGE:756708	4.55793	2.58044	0.566144	5.68066	0	0
	ITPR3 || Inositol 1,4,5-triphosphate receptor, type 3 || 105346	IMAGE:435953	4.55769	2.30489	0.505714	4.44225	0	0
	MYD88 || Myeloid differentiation primary response gene (88) || 103687	IMAGE:190887	4.55711	1.76244	0.386746	3.29434	0	0
	TRIM22 || Tripartite motif-containing 22 || 106240	IMAGE:549146	4.55657	1.96533	0.431319	3.71347	0	0
	CALU || Calumenin || 114204	IMAGE:144881	4.55022	1.66816	0.366611	3.25075	0	0
	CHR2SYT || Chr2 synaptotagmin || 223034	IMAGE:824201	4.5492	1.74411	0.383388	3.40247	0	0
	ASS || Argininosuccinate synthetase || 308435	IMAGE:882461	4.54696	2.27633	0.500627	5.04746	0	0
	|| || 310520	IMAGE:882467	4.54162	2.40378	0.529278	5.31914	0	0
	RAB34 || RAB34, member RAS oncogene family || 117411	IMAGE:811059	4.52772	2.11944	0.468105	4.19311	0	0
	|| || 223949	IMAGE:1591788	4.5201	2.15222	0.476145	4.17479	0	0
	BUB3 || BUB3 budding uninhibited by benzimidazoles 3 homolog (yeast) || 113800	IMAGE:742952	4.51917	1.65222	0.365603	3.06112	0	0
	KRT19 || Keratin 19 || 102332	IMAGE:810131	4.51703	3.89633	0.862588	9.60307	0	0
	|| || 119139	IMAGE:258761	4.51663	2.952	0.653584	7.32821	0	0
	PLEC1 || Plectin 1, intermediate filament binding protein 500kDa || 106597	IMAGE:857249	4.5158	2.03444	0.450517	3.88765	0	0
	SDC1 || Syndecan 1 || 310273	IMAGE:1635538	4.50853	2.20567	0.489221	4.3219	0	0
	GPR126 || G protein-coupled receptor 126 || 118729	IMAGE:786695	4.50549	2.37468	0.527063	5.4747	0	0
	EPHA2 || EPH receptor A2 || 308241	IMAGE:84823	4.50021	1.98456	0.440992	3.77265	0	0
	NPC1 || Niemann-Pick disease, type C1 || 103987	IMAGE:868484	4.49911	2.25244	0.500642	4.31392	0	0
	PPM1B || Protein phosphatase 1B (formerly 2C), magnesium-dependent, beta isoform || 220329	IMAGE:25315	4.47339	2.38756	0.533724	4.9027	0	0
	SLC7A7 || Solute carrier family 7 (cationic amino acid transporter, y+ system), member 7 || 103432	IMAGE:122063	4.46994	2.53891	0.567996	5.58154	0	0
	KRT19 || Keratin 19 || 116089	IMAGE:510466	4.46663	3.626	0.811797	8.2724	0	0
	OSBPL10 || Oxysterol binding protein-like 10 || 106081	IMAGE:151597	4.46455	2.40956	0.539708	4.75639	0	0
	|| Transcribed locus || 307457	IMAGE:1535416	4.46447	2.02367	0.453283	4.12825	0	0
	RNF121 || Ring finger protein 121 || 226399	IMAGE:454593	4.46099	1.70933	0.383174	3.18234	0	0
	AFAP || Hypothetical protein LOC254848 || 106865	IMAGE:142122	4.45682	2.19978	0.493576	4.2582	0	0
	PPBP || Pro-platelet basic protein (chemokine (C-X-C motif) ligand 7) || 116492	IMAGE:418422	4.45341	3.2279	0.724815	13.0243	0	0
	PELO || Integrin, alpha 1 || 115848	IMAGE:212078	4.45129	1.77889	0.399634	3.34487	0	0
	ITGB4 || Integrin, beta 4 || 116083	IMAGE:811096	4.45089	2.89707	0.650896	8.24438	0	0
	CTSE || Cathepsin E || 119852	IMAGE:243202	4.44886	3.11911	0.701104	7.01912	0	0
	ZNHIT2 || Zinc finger, HIT domain containing 2 || 221037	1292829	4.4429	1.96094	0.441366	3.7381	0	0
	SPOCD1 || SPOC domain containing 1 || 226524	IMAGE:413292	4.43872	2.27144	0.511734	4.61521	0	0
	MITF || Microphthalmia-associated transcription factor || 308207	IMAGE:1592976	4.43724	1.85417	0.417866	3.74181	0	0
	|| T-cell receptor beta chain V3-D-J2.7-C2 region || 101878	IMAGE:306841	4.4321	2.92678	0.660359	5.68549	0	0
	DSG2 || Desmoglein 2 || 105805	IMAGE:321902	4.43039	2.01033	0.45376	4.3437	0	0
	PBK || PDZ binding kinase || 113173	IMAGE:785368	4.42039	2.04489	0.462603	3.94877	0	0
	C20orf42 || Chromosome 20 open reading frame 42 || 109895	IMAGE:843045	4.41614	1.86244	0.421736	3.67482	0	0
	RAP2B || RAP2B, member of RAS oncogene family || 226689	IMAGE:109879	4.41142	2.21269	0.501582	4.32954	0	0
	ULBP2 || UL16 binding protein 2 || 108155	IMAGE:36367	4.40598	2.56895	0.583059	5.69574	0	0
	BASP1 || Brain abundant, membrane attached signal protein 1 || 114548	IMAGE:843098	4.40257	3.01978	0.685913	6.95934	0	0
	RRAD || **Ras-related associated with diabetes || 120085	IMAGE:356665	4.39552	1.75489	0.399246	3.31006	0	0
	KIF3C || Kinesin family member 3C || 114367	IMAGE:784257	4.39551	1.61771	0.368037	3.10839	0	0
	ITGA6 || Integrin, alpha 6 || 101822	IMAGE:44814	4.39228	2.01567	0.458912	4.31865	0	0
	DOCK5 || Dedicator of cytokinesis 5 || 312987	IMAGE:1570660	4.38877	1.87582	0.427414	3.79386	0	0
	ARHGEF2 || Rho/rac guanine nucleotide exchange factor (GEF) 2 || 309018	IMAGE:769975	4.38388	2.12651	0.485075	4.1653	0	0
	|| **Similar to Gastric cancer up-regulated-2 || 119890	IMAGE:131316	4.38315	2.69129	0.614007	5.92601	0	0
	ISG20 || Interferon stimulated gene 20kDa || 108180	IMAGE:491751	4.38272	2.62167	0.598182	5.48966	0	0
	AP1S1 || Adaptor-related protein complex 1, sigma 1 subunit || 120193	IMAGE:323693	4.38217	2.30367	0.525691	4.61338	0	0
	EPB41L2 || Erythrocyte membrane protein band 4.1-like 2 || 104932	IMAGE:417426	4.37983	1.78589	0.407753	3.42643	0	0
	|| Similar to tripartite motif-containing 16; estrogen-responsive B box protein || 318576	IMAGE:2298710	4.37295	2.57687	0.589274	5.07202	0	0
	E2F1 || E2F transcription factor 1 || 111563	IMAGE:236142	4.37126	3.12411	0.714693	7.78911	0	0
	FA2H || Fatty acid 2-hydroxylase || 115340	IMAGE:811891	4.3673	2.01856	0.462197	4.02488	0	0
	HAPIP || Kalirin, RhoGEF kinase || 225799	IMAGE:971279	4.36346	2.42424	0.555579	4.58352	0	0
	|| || 120280	IMAGE:1324551	4.36345	2.59089	0.593771	5.33381	0	0
	SYTL2 || Synaptotagmin-like 2 || 220140	IMAGE:487932	4.35573	3.11922	0.716119	11.1764	0	0
	EMB || Embigin homolog (mouse) || 185134	IMAGE:826335	4.35284	2.00298	0.460155	3.6669	0	0
	SLC16A4 || Solute carrier family 16 (monocarboxylic acid transporters), member 4 || 108622	IMAGE:141562	4.34948	2.63889	0.606715	4.79784	0	0
	KLK10 || Kallikrein 10 || 100104	IMAGE:810960	4.34465	2.30467	0.53046	4.9288	0	0
	PTPRK || Protein tyrosine phosphatase, receptor type, K || 103308	IMAGE:146123	4.3414	1.79911	0.414408	3.36803	0	0
	G1P2 || Interferon, alpha-inducible protein (clone IFI-15K) || 109652	IMAGE:490961	4.33938	2.40167	0.553458	5.92649	0	0
	EMB || Embigin homolog (mouse) || 106873	IMAGE:502287	4.33319	1.99289	0.459912	3.61146	0	0
	CNN2 || Calponin 2 || 118917	IMAGE:713886	4.32899	1.76411	0.407511	3.31238	0	0
	CYBA || Cytochrome b-245, alpha polypeptide || 119795	IMAGE:1161830	4.32886	2.45788	0.567788	5.29819	0	0
	DFFA || DNA fragmentation factor, 45kDa, alpha polypeptide || 116397	IMAGE:841357	4.32021	2.16908	0.502078	4.38375	0	0
	ITGA6 || Integrin, alpha 6 || 117113	IMAGE:73784	4.31626	1.949	0.451548	3.94933	0	0
	|| || 108765	IMAGE:753684	4.3138	1.63984	0.380138	3.03454	0	0
	SFXN3 || Sideroflexin 3 || 119850	IMAGE:726236	4.31363	1.73989	0.403347	3.33464	0	0
	C20orf129 || Chromosome 20 open reading frame 129 || 108697	IMAGE:200402	4.31359	1.958	0.453914	3.67542	0	0
	BUB1B || BUB1 budding uninhibited by benzimidazoles 1 homolog beta (yeast) || 105226	IMAGE:842968	4.31198	2.62156	0.60797	5.52132	0	0
	NOPE || Likely ortholog of mouse neighbor of Punc E11 || 108290	IMAGE:284101	4.31162	1.67758	0.389084	3.29314	0	0
	MLPH || Melanophilin || 118673	IMAGE:782972	4.3108	1.80811	0.419438	3.42867	0	0
	GBE1 || Glucan (1,4-alpha-), branching enzyme 1 (glycogen branching enzyme, Andersen disease, glycogen storage disease type IV) || 101075	IMAGE:127509	4.30911	1.81578	0.421382	3.42722	0	0
	CLIC5 || Chloride intracellular channel 5 || 115454	IMAGE:148914	4.30397	2.01311	0.467734	4.31653	0	0
	HK1 || Hexokinase 1 || 108439	IMAGE:840158	4.29728	2.30267	0.535843	4.42605	0	0
	BBP || **Beta-amyloid binding protein precursor || 111717	IMAGE:119728	4.29701	1.76444	0.410621	3.28685	0	0
	SLPI || Secretory leukocyte protease inhibitor (antileukoproteinase) || 307304	IMAGE:366902	4.29584	2.93333	0.682831	7.52026	0	0
	IMP-2 || IGF-II mRNA-binding protein 2 || 222719	IMAGE:743774	4.29329	2.13392	0.497035	4.58941	0	0
	TGM2 || **Transglutaminase 2 (C polypeptide, protein-glutamine-gamma-glutamyltransferase) || 113510	IMAGE:199945	4.28968	2.91178	0.678786	7.38296	0	0
	LOC493869 || Similar to RIKEN cDNA 2310016C16 || 116402	IMAGE:787851	4.28869	2.09933	0.489504	4.00876	0	0
	SEMA3A || Sema domain, immunoglobulin domain (Ig), short basic domain, secreted, (semaphorin) 3A || 222205	IMAGE:283329	4.27235	1.88344	0.440845	3.59128	0	0
	CDKN3 || Cyclin-dependent kinase inhibitor 3 (CDK2-associated dual specificity phosphatase) || 105407	IMAGE:700792	4.26751	2.36544	0.554291	5.27695	0	0
	CYR61 || Cysteine-rich, angiogenic inducer, 61 || 308090	IMAGE:360254	4.26713	2.32211	0.544186	4.53445	0	0
	ZWINT || ZW10 interactor || 120213	IMAGE:451907	4.2586	2.66733	0.62634	7.87029	0	0
	MAL2 || Mal, T-cell differentiation protein 2 || 102977	IMAGE:813730	4.25713	2.08733	0.490315	4.22712	0	0
	HCG4P6 || HLA complex group 4 pseudogene 6 || 115162	IMAGE:853906	4.25	2.50816	0.590155	4.92705	0	0
	FNBP1 || Formin binding protein 1 || 310628	IMAGE:814620	4.22763	2.02222	0.478335	3.81226	0	0
	|| || 224514	IMAGE:265103	4.20818	1.809	0.429878	3.5536	0	0
	|| || 314511	IMAGE:1567676	4.19841	2.36511	0.563335	4.63665	0	0
	PLAUR || Plasminogen activator, urokinase receptor || 108945	IMAGE:590154	4.18014	2.81956	0.674512	6.07319	0	0
	UACA || Uveal autoantigen with coiled-coil domains and ankyrin repeats || 120786	IMAGE:71312	4.1751	1.6826	0.403008	3.23443	0	0
	EVI2A || Ecotropic viral integration site 2A || 224412	IMAGE:824933	4.15376	2.466	0.593679	4.61042	0	0
	SLPI || Secretory leukocyte protease inhibitor (antileukoproteinase) || 117800	IMAGE:366950	4.15255	2.51222	0.604983	5.55092	0	0
	RNASET2 || Ribonuclease T2 || 105635	IMAGE:712341	4.15252	1.82733	0.440055	3.53215	0	0
	FST || Follistatin || 107215	IMAGE:434768	4.14894	3.48778	0.840642	13.5784	0	0
	CKMT1 || Creatine kinase, mitochondrial 1 (ubiquitous) || 309014	IMAGE:2019469	4.13997	1.89667	0.458135	3.67476	0	0
	FLJ10350 || Hypothetical protein FLJ10350 || 117908	IMAGE:611412	4.1315	2.07314	0.50179	3.77342	0	0
	TIMP2 || Tissue inhibitor of metalloproteinase 2 || 114419	IMAGE:80256	4.12795	1.89367	0.458743	3.68436	0	0
	GRN || Granulin || 106935	IMAGE:755762	4.12681	2.24989	0.545188	4.29575	0	0
	KIF23 || Kinesin family member 23 || 108920	IMAGE:788256	4.12386	2.75233	0.667416	5.95825	0	0
	ACTN1 || Actinin, alpha 1 || 104265	IMAGE:854079	4.12325	2.13031	0.516658	3.97902	0	0
	GOLPH2 || Golgi phosphoprotein 2 || 117408	IMAGE:811582	4.11821	1.94444	0.472158	4.00822	0	0
	ARPC1B || Actin related protein 2/3 complex, subunit 1B, 41kDa || 120220	IMAGE:626502	4.11804	2.15444	0.523172	4.13932	0	0
	SLC38A2 || Solute carrier family 38, member 2 || 111798	IMAGE:897733	4.11714	1.81433	0.440678	3.29056	0	0
	STK24 || Serine/threonine kinase 24 (STE20 homolog, yeast) || 109809	IMAGE:773137	4.11638	1.8038	0.438201	3.22654	0	0
	ACSL5 || Acyl-CoA synthetase long-chain family member 5 || 224130	IMAGE:462325	4.11418	2.66956	0.648868	6.79643	0	0
	MSLN || Mesothelin || 112298	IMAGE:843028	4.10826	2.28684	0.556645	4.83874	0	0
	GBP3 || Guanylate binding protein 3 || 108148	IMAGE:144916	4.10801	1.88571	0.459032	3.77193	0	0
	RARRES3 || Retinoic acid receptor responder (tazarotene induced) 3 || 116761	IMAGE:324225	4.10652	2.18834	0.532894	4.29159	0	0
	TIMP2 || Tissue inhibitor of metalloproteinase 2 || 308010	IMAGE:1534435	4.10637	1.99944	0.486913	4.02751	0	0
	|| **Similar to chromosome 15 open reading frame 2 || 119060	IMAGE:811943	4.10561	2.18904	0.533184	5.14679	0	0
	LOC340061 || Hypothetical protein LOC340061 || 103974	IMAGE:81662	4.10204	2.28611	0.557311	4.34137	0	0
	MYADM || Myeloid-associated differentiation marker || 223603	IMAGE:261444	4.09522	2.36944	0.578587	4.70963	0	0
	CAPG || Capping protein (actin filament), gelsolin-like || 119143	IMAGE:841059	4.08582	2.03544	0.498173	4.01383	0	0
	CaMKIINalpha || Calcium/calmodulin-dependent protein kinase II || 112607	IMAGE:503602	4.08138	2.22567	0.545322	4.67768	0	0
	NTN4 || Netrin 4 || 102822	IMAGE:143661	4.07249	1.81912	0.446685	3.63265	0	0
	STK6 || Serine/threonine kinase 6 || 98982	IMAGE:129865	4.07055	2.62896	0.645849	6.46641	0	0
	TM4SF9 || Transmembrane 4 superfamily member 9 || 117428	IMAGE:52339	4.06127	2.00584	0.493894	3.66249	0	0
	SLC38A1 || Solute carrier family 38, member 1 || 106040	IMAGE:788541	4.06121	2.139	0.52669	4.3278	0	0
	C6orf115 || Chromosome 6 open reading frame 115 || 223777	IMAGE:701115	4.05982	1.928	0.474897	3.53407	0	0
	S100A10 || **S100 calcium binding protein A10 (annexin II ligand, calpactin I, light polypeptide (p11)) || 104759	IMAGE:1472405	4.05449	2.41722	0.596184	4.81296	0	0
	ARHE || Rho family GTPase 3 || 116517	IMAGE:415851	4.05317	3.10744	0.76667	6.17311	0	0
	PAR1 || Prader-Willi/Angelman region-1 || 98377	IMAGE:1020212	4.05276	1.742	0.42983	3.18285	0	0
	UBE2C || Ubiquitin-conjugating enzyme E2C || 119851	IMAGE:769921	4.05182	2.79089	0.688799	7.03247	0	0
	IQGAP3 || IQ motif containing GTPase activating protein 3 || 105561	IMAGE:1861173	4.05139	1.90333	0.469797	3.74354	0	0
	ID1 || Inhibitor of DNA binding 1, dominant negative helix-loop-helix protein || 105639	IMAGE:810485	4.04167	2.21689	0.548508	4.9085	0	0
	TGFA || Transforming growth factor, alpha || 102349	IMAGE:325822	4.03855	2.08843	0.517123	4.44012	0	0
	KIAA1539 || KIAA1539 || 117829	IMAGE:724960	4.03694	1.75459	0.434633	3.48934	0	0
	|| Homo sapiens, Similar to unnamed HERV-H protein, clone IMAGE:3996038, mRNA || 222748	IMAGE:447520	4.03	3.71191	0.921068	10.9371	0	0
	EPS8 || Epidermal growth factor receptor pathway substrate 8 || 99229	IMAGE:148028	4.02667	1.76722	0.43888	3.65373	0	0
	TRIM31 || Tripartite motif-containing 31 || 109073	IMAGE:510528	4.0258	2.13556	0.530468	4.46224	0	0
	MAP4K4 || Mitogen-activated protein kinase kinase kinase kinase 4 || 106593	IMAGE:207803	4.02077	2.05715	0.511631	3.91823	0	0
	CDC25B || Cell division cycle 25B || 109366	IMAGE:786067	4.02002	2.02744	0.504336	4.1255	0	0
	LOC285458 || Similar to hypothetical protein MGC27019 || 307615	IMAGE:1572723	4.01981	1.79776	0.447227	3.44756	0	0
	GPR107 || G protein-coupled receptor 107 || 221104	IMAGE:281639	4.01955	1.95133	0.48546	3.52272	0	0
	MITF || Microphthalmia-associated transcription factor || 102046	IMAGE:278570	4.01264	1.95256	0.486601	3.93127	0	0
	RNASET2 || Ribonuclease T2 || 103851	IMAGE:345032	4.01198	1.65267	0.411933	3.27236	0	0
	MGC5395 || AHNAK nucleoprotein (desmoyokin) || 110087	IMAGE:79216	4.00331	2.034	0.508079	3.97595	0	0
	CEACAM1 || Carcinoembryonic antigen-related cell adhesion molecule 1 (biliary glycoprotein) || 104008	IMAGE:753301	4.00089	2.10167	0.5253	4.34586	0	0
	EFNB2 || Ephrin-B2 || 112160	IMAGE:723955	3.99486	2.25478	0.564419	4.42765	0	0
	CRABP2 || Cellular retinoic acid binding protein 2 || 102191	IMAGE:897770	3.98559	2.2564	0.566139	5.1428	0	0
	BUB3 || BUB3 budding uninhibited by benzimidazoles 3 homolog (yeast) || 101188	IMAGE:191904	3.97804	1.67178	0.420251	3.38987	0	0
	NQO1 || NAD(P)H dehydrogenase, quinone 1 || 104517	IMAGE:813387	3.97651	1.88633	0.474369	3.47304	0	0
	LRRC8 || Leucine rich repeat containing 8 || 111022	IMAGE:592818	3.97575	2.07377	0.521603	3.93737	0	0
	MAP3K8 || Mitogen-activated protein kinase kinase kinase 8 || 113841	IMAGE:340630	3.97344	1.83211	0.46109	3.2905	0	0
	FLJ22582 || BAI1-associated protein 2-like 2 || 101745	IMAGE:901105	3.97236	1.92704	0.485112	3.82051	0	0
	KRT23 || Keratin 23 (histone deacetylase inducible) || 225146	IMAGE:454970	3.96497	2.13977	0.539669	4.41861	0	0
	ELF4 || E74-like factor 4 (ets domain transcription factor) || 110954	IMAGE:48614	3.96249	2.54817	0.643072	5.00401	0	0
	TMPRSS4 || Transmembrane protease, serine 4 || 112920	IMAGE:510069	3.96212	2.97104	0.749863	6.40005	0	0
	AURKB || Aurora kinase B || 163388	IMAGE:241029	3.96157	2.007	0.506617	4.27122	0	0
	NR2F2 || Nuclear receptor subfamily 2, group F, member 2 || 110201	IMAGE:767313	3.95863	2.00422	0.506291	4.33085	0	0
	FER1L4 || Fer-1-like 4 (C. elegans) || 104486	IMAGE:592777	3.95855	1.76743	0.446485	3.21673	0	0
	|| Hypothetical gene supported by AK092138 || 310562	IMAGE:1607473	3.95478	1.87289	0.473576	3.42259	0	0
	EHD1 || EH-domain containing 1 || 112162	IMAGE:745019	3.95417	2.19611	0.555392	4.02751	0	0
	RAD23A || RAD23 homolog A (S. cerevisiae) || 114209	IMAGE:770674	3.94675	2.12811	0.539206	3.86589	0	0
	SEC23A || Sec23 homolog A (S. cerevisiae) || 102689	IMAGE:753381	3.94159	1.71611	0.435385	3.16984	0	0
	KCTD5 || Potassium channel tetramerisation domain containing 5 || 109632	IMAGE:771157	3.94014	1.96211	0.49798	3.78392	0	0
	CORO2A || Coronin, actin binding protein, 2A || 220463	IMAGE:1580874	3.9391	1.74892	0.443988	3.58218	0	0
	ITGA2 || Integrin, alpha 2 (CD49B, alpha 2 subunit of VLA-2 receptor) || 308597	IMAGE:1623955	3.93659	3.43162	0.871724	8.62966	0	0
	ASS || Argininosuccinate synthetase || 110941	IMAGE:882522	3.93505	2.29256	0.582598	5.13543	0	0
	STC1 || Stanniocalcin 1 || 307378	IMAGE:565075	3.93249	2.15678	0.548451	4.39507	0	0
	SOX4 || SRY (sex determining region Y)-box 4 || 107550	IMAGE:788205	3.93109	2.33178	0.593163	4.69264	0	0
	CTSZ || Cathepsin Z || 224574	IMAGE:739116	3.93058	1.81067	0.460661	3.57873	0	0
	TIMP1 || Tissue inhibitor of metalloproteinase 1 (erythroid potentiating activity, collagenase inhibitor) || 114079	IMAGE:240766	3.92918	1.86022	0.473438	3.80462	0	0
	STK25 || Serine/threonine kinase 25 (STE20 homolog, yeast) || 225504	IMAGE:454592	3.9273	1.62904	0.4148	3.02931	0	0
	|| LOC440314 || 222126	IMAGE:258649	3.927	2.16873	0.552261	4.44694	0	0
	PSG1 || Pregnancy specific beta-1-glycoprotein 1 || 113197	IMAGE:199635	3.92688	2.87416	0.73192	5.97608	0	0
	GRN || **Granulin || 118426	IMAGE:1861415	3.92352	1.79	0.456222	3.32829	0	0
	|| Transcribed locus || 312244	IMAGE:1702742	3.92117	2.41329	0.615452	5.74265	0	0
	HLA-C || Major histocompatibility complex, class I, C || 113661	IMAGE:810142	3.92077	2.00433	0.51121	3.57139	0	0
	PALM2-AKAP2 || PALM2-AKAP2 protein || 225677	IMAGE:262695	3.91975	2.23989	0.571437	4.00846	0	0
	TM4SF9 || Transmembrane 4 superfamily member 9 || 120432	IMAGE:345123	3.91273	2.58906	0.661703	4.99654	0	0
	IQGAP3 || IQ motif containing GTPase activating protein 3 || 101410	IMAGE:1862628	3.9119	1.97389	0.504585	4.29275	0	0
	UHRF1 || Ubiquitin-like, containing PHD and RING finger domains, 1 || 222600	IMAGE:366414	3.91107	2.06344	0.52759	3.69167	0	0
	POLB || Polymerase (DNA directed), beta || 311584	IMAGE:34965	3.90089	1.65378	0.423949	3.09483	0	0
	UACA || Uveal autoantigen with coiled-coil domains and ankyrin repeats || 308198	IMAGE:1527412	3.89621	1.59722	0.409942	3.09045	0	0
	TPX2 || TPX2, microtubule-associated protein homolog (Xenopus laevis) || 118635	IMAGE:232837	3.8952	2.9924	0.76823	8.0347	0	0
	|| Transcribed locus || 108654	IMAGE:195117	3.89412	2.31424	0.594292	4.60532	0	0
	GYS1 || Glycogen synthase 1 (muscle) || 108752	IMAGE:45632	3.88782	1.65849	0.426585	3.12154	0	0
	PALM2-AKAP2 || PALM2-AKAP2 protein || 112149	IMAGE:843041	3.88604	2.31144	0.594807	4.09628	0	0
	PSG1 || Pregnancy specific beta-1-glycoprotein 1 || 113694	IMAGE:120189	3.88258	2.22163	0.572204	4.12807	0	0
	|| || 223563	IMAGE:882355	3.88163	1.984	0.511125	4.41292	0	0
	CCNB2 || Cyclin B2 || 223334	IMAGE:856289	3.87851	2.48944	0.641856	5.73473	0	0
	MAD2L1 || MAD2 mitotic arrest deficient-like 1 (yeast) || 102603	IMAGE:814701	3.87431	2.355	0.607849	4.92135	0	0
	AKAP12 || A kinase (PRKA) anchor protein (gravin) 12 || 111312	IMAGE:292522	3.87228	1.96398	0.507189	3.76162	0	0
	EMR3 || Egf-like module containing, mucin-like, hormone receptor-like 3 || 103688	IMAGE:343072	3.86978	2.71411	0.701361	6.38517	0	0
	KRT17 || Keratin 17 || 119385	IMAGE:366889	3.8677	4.432	1.1459	12.929	0	0
	|| || 222190	IMAGE:449039	3.85754	2.09233	0.542401	3.81961	0	0
	TNFRSF21 || Tumor necrosis factor receptor superfamily, member 21 || 115226	IMAGE:823902	3.85256	1.98922	0.516338	3.63416	0	0
	IFIT2 || Interferon-induced protein with tetratricopeptide repeats 2 || 109993	IMAGE:289496	3.8503	1.86867	0.48533	3.4638	0	0
	LIPH || Lipase, member H || 107386	IMAGE:511901	3.8429	2.20089	0.572716	4.02278	0	0
	KYNU || Kynureninase (L-kynurenine hydrolase) || 106305	IMAGE:1456405	3.8407	1.69269	0.440723	3.51468	0	0
	SLC12A2 || Solute carrier family 12 (sodium/potassium/chloride transporters), member 2 || 101321	IMAGE:564801	3.83796	2.026	0.527885	4.22793	0	0
	GJB3 || Gap junction protein, beta 3, 31kDa (connexin 31) || 311988	IMAGE:1858230	3.83604	2.34401	0.61105	5.40231	0	0
	STC1 || Stanniocalcin 1 || 115728	IMAGE:547247	3.83378	1.88867	0.492638	3.62539	0	0
	GBP1 || Guanylate binding protein 1, interferon-inducible, 67kDa || 100368	IMAGE:841008	3.82839	2.07522	0.542062	3.73235	0	0
	SLC9A1 || Solute carrier family 9 (sodium/hydrogen exchanger), isoform 1 (antiporter, Na+/H+, amiloride sensitive) || 312481	IMAGE:240183	3.82051	1.84544	0.483036	3.43265	0	0
	S100P || S100 calcium binding protein P || 106050	IMAGE:135221	3.81581	2.75267	0.721385	5.41696	0	0
	COPB2 || **Coatomer protein complex, subunit beta 2 (beta prime) || 99099	IMAGE:278687	3.81462	2.70933	0.710251	5.27986	0	0
	ITGB5 || Integrin, beta 5 || 108807	IMAGE:770859	3.81366	1.70744	0.447718	3.25001	0	0
	RBMS2 || RNA binding motif, single stranded interacting protein 2 || 105286	IMAGE:416107	3.81249	1.89031	0.495819	3.82934	0	0
	MGC4677 || Hypothetical protein MGC4677 || 115572	IMAGE:121436	3.80855	2.35178	0.6175	4.62175	0	0
	LY6E || Lymphocyte antigen 6 complex, locus E || 105624	IMAGE:1470048	3.80139	2.02978	0.533957	3.63459	0	0
	GJA7 || Gap junction protein, alpha 7, 45kDa (connexin 45) || 226632	IMAGE:489668	3.7964	1.81088	0.476999	3.28874	0	0
	KIAA0720 || Putative NFkB activating protein || 108892	IMAGE:136317	3.79486	1.65749	0.436772	3.14927	0	0
	TUBB || Tubulin, beta polypeptide || 118969	IMAGE:191603	3.79248	1.944	0.512594	4.02416	0	0
	CAV2 || Caveolin 2 || 308842	IMAGE:1946448	3.78989	1.67122	0.440968	3.0932	0	0
	TPM4 || Tropomyosin 4 || 221908	IMAGE:970880	3.78942	2.27244	0.599682	3.98318	0	0
	CACNB3 || Calcium channel, voltage-dependent, beta 3 subunit || 108819	IMAGE:25922	3.78689	1.69694	0.448109	3.26487	0	0
	HS3ST1 || Heparan sulfate (glucosamine) 3-O-sulfotransferase 1 || 107824	IMAGE:73609	3.78285	3.02014	0.798376	6.18164	0	0
	|| CDNA FLJ35270 fis, clone PROST2005630 || 185732	IMAGE:825207	3.78278	1.78034	0.470645	3.21472	0	0
	SEMA3C || Sema domain, immunoglobulin domain (Ig), short basic domain, secreted, (semaphorin) 3C || 118286	IMAGE:486591	3.78214	1.79022	0.473336	3.44236	0	0
	MYADM || Myeloid-associated differentiation marker || 224226	IMAGE:433491	3.78014	2.09744	0.55486	4.02843	0	0
	ARPC2 || Actin related protein 2/3 complex, subunit 2, 34kDa || 102194	IMAGE:162208	3.77923	1.69689	0.449004	3.20965	0	0
	BNC1 || Basonuclin 1 || 108668	IMAGE:132373	3.77875	1.87263	0.495569	4.15577	0	0
	CD9 || CD9 antigen (p24) || 103549	IMAGE:727251	3.77611	1.842	0.487804	3.35448	0	0
	CAV2 || Caveolin 2 || 115140	IMAGE:110467	3.7744	1.99044	0.527354	3.57969	0	0
	LOC57146 || Promethin || 120691	IMAGE:46355	3.77061	1.66989	0.44287	3.22222	0	0
	|| || 114588	IMAGE:950586	3.76826	1.84467	0.489527	3.41327	0	0
	EMR3 || Egf-like module containing, mucin-like, hormone receptor-like 3 || 100906	IMAGE:325953	3.76215	2.58667	0.687551	5.72317	0	0
	FUT8 || Fucosyltransferase 8 (alpha (1,6) fucosyltransferase) || 309794	IMAGE:1968246	3.74546	1.59381	0.425532	3.20025	0	0
	MAD1L1 || MAD1 mitotic arrest deficient-like 1 (yeast) || 109026	1292432	3.74534	1.73144	0.462293	3.1122	0	0
	MET || Met proto-oncogene (hepatocyte growth factor receptor) || 118174	IMAGE:626841	3.7445	2.18933	0.58468	4.00505	0	0
	|| || 317711	IMAGE:1911913	3.73886	2.72311	0.728327	6.98221	0	0
	LASP1 || LIM and SH3 protein 1 || 309894	IMAGE:1631663	3.73648	2.06656	0.553076	3.68741	0	0
	ABCF1 || ATP-binding cassette, sub-family F (GCN20), member 1 || 111590	IMAGE:811161	3.73471	2.21422	0.592877	4.01338	0	0
	DTYMK || Deoxythymidylate kinase (thymidylate kinase) || 114222	IMAGE:810156	3.72753	1.70556	0.457557	3.14915	0	0
	FLJ14213 || Hypothetical protein FLJ14213 || 106246	IMAGE:627252	3.72502	1.82094	0.488841	3.33853	0	0
	C10orf74 || Chromosome 10 open reading frame 74 || 116840	IMAGE:951313	3.72223	1.83933	0.494148	3.41365	0	0
	KPNA2 || Karyopherin alpha 2 (RAG cohort 1, importin alpha 1) || 316641	IMAGE:824962	3.72009	2.29533	0.61701	5.12182	0	0
	TM4SF14 || Transmembrane 4 superfamily member 14 || 109161	IMAGE:502880	3.70785	1.79311	0.483599	3.27595	0	0
	CYR61 || Cysteine-rich, angiogenic inducer, 61 || 309270	IMAGE:1607286	3.70553	2.25856	0.60951	4.54304	0	0
	MARVELD2 || MARVEL domain containing 2 || 110933	IMAGE:320865	3.6944	2.18127	0.590425	3.99163	0	0
	CDCA1 || Cell division cycle associated 1 || 99493	IMAGE:731095	3.6928	2.59878	0.703743	6.26306	0	0
	PCDH1 || Protocadherin 1 (cadherin-like 1) || 223043	IMAGE:145491	3.69155	1.94139	0.525901	3.44199	0	0
	SDCBP2 || Syndecan binding protein (syntenin) 2 || 221782	IMAGE:1555478	3.69076	2.25249	0.610305	4.05063	0	0
	F3 || Coagulation factor III (thromboplastin, tissue factor) || 308977	IMAGE:1928791	3.68456	2.50111	0.678809	4.48127	0	0
	UPP1 || Uridine phosphorylase 1 || 110238	IMAGE:489677	3.68274	1.66908	0.453216	3.04807	0	0
	FSTL1 || Follistatin-like 1 || 99636	IMAGE:625384	3.67629	2.20122	0.598761	4.04776	0	0
	ALKBH || **AlkB, alkylation repair homolog (E. coli) || 105421	IMAGE:301388	3.67524	1.55189	0.422255	3.17612	0	0
	|| || 316069	IMAGE:1881224	3.67406	1.70559	0.464226	3.03152	0	0
	LRP8 || Low density lipoprotein receptor-related protein 8, apolipoprotein e receptor || 105705	IMAGE:415554	3.6732	1.67522	0.456066	3.25655	0	0
	LOC150383 || Similar to RIKEN cDNA 2210021J22 || 310856	IMAGE:53245	3.67223	1.76549	0.480767	3.16204	0	0
	|| **CDNA: FLJ23585 fis, clone LNG14352 || 116411	IMAGE:611209	3.66845	1.75368	0.478044	3.49777	0	0
	CORO1C || Coronin, actin binding protein, 1C || 98940	IMAGE:511647	3.66117	1.93267	0.527882	3.28722	0	0.0147108
	GLRX || Glutaredoxin (thioltransferase) || 119952	IMAGE:700527	3.66057	2.39422	0.654058	4.68996	0	0.0176949
	IER5 || Immediate early response 5 || 311516	IMAGE:1704155	3.65771	1.75033	0.478532	3.13072	0	0.0318029
	PTTG1 || Pituitary tumor-transforming 1 || 103234	IMAGE:781089	3.65674	2.54864	0.696972	5.24126	0	0.0366235
	SERPINB3 || Serine (or cysteine) proteinase inhibitor, clade B (ovalbumin), member 3 || 120413	IMAGE:727147	3.65653	2.09631	0.573306	5.38835	0	0.0376709
	FLJ10407 || Hypothetical protein FLJ10407 || 223443	IMAGE:824126	3.65614	1.75723	0.480625	3.2052	0	0.039579
	RER1 || RER1 retention in endoplasmic reticulum 1 homolog (S. cerevisiae) || 99197	IMAGE:769565	3.64268	1.99517	0.547721	3.52283	0	0.107052
	GPR || Putative G protein coupled receptor || 103651	IMAGE:309929	3.63787	1.84807	0.508008	3.42534	0	0.131498
	CAPZA1 || Capping protein (actin filament) muscle Z-line, alpha 1 || 309714	IMAGE:1558543	3.63376	1.63947	0.451177	3.13918	0	0.152504
	RHOF || Ras homolog gene family, member F (in filopodia) || 308681	IMAGE:1643138	3.63251	1.90576	0.524638	3.70087	0	0.158887
	TK1 || Thymidine kinase 1, soluble || 115756	IMAGE:379920	3.63028	2.56356	0.706159	6.89576	0	0.170358
	C18orf11 || **Chromosome 18 open reading frame 11 || 111051	IMAGE:37671	3.62975	1.68167	0.463301	3.04842	0	0.173128
	EMB || Embigin homolog (mouse) || 316392	IMAGE:1877234	3.62565	2.06722	0.570166	3.43516	0	0.194303
	PLK1 || Polo-like kinase 1 (Drosophila) || 111792	IMAGE:744047	3.62442	2.41389	0.666007	6.49886	0	0.200676
	KDR || Kinase insert domain receptor (a type III receptor tyrosine kinase) || 117209	IMAGE:469345	3.62379	1.86056	0.513427	3.75654	0	0.203929
	TBL1XR1 || Transducin (beta)-like 1X-linked receptor 1 || 106028	IMAGE:503851	3.6235	1.57556	0.434816	3.00633	0	0.205451
	NAGA || N-acetylgalactosaminidase, alpha- || 104054	IMAGE:36493	3.62238	1.94467	0.536848	3.47921	0	0.211309
	GNA15 || Guanine nucleotide binding protein (G protein), alpha 15 (Gq class) || 106877	IMAGE:122394	3.61968	2.23185	0.616586	4.70579	0	0.225358
	TMSB4X || Thymosin, beta 4, X-linked || 98429	IMAGE:868368	3.61462	1.66489	0.460598	3.08567	0	0.251892
	DKFZp762E1312 || Hypothetical protein DKFZp762E1312 || 117169	IMAGE:66406	3.61146	2.081	0.576221	4.62264	0	0.268563
	OPRS1 || Opioid receptor, sigma 1 || 319946	IMAGE:1948377	3.60942	2.51475	0.696719	4.94986	0	0.279378
	KRT7 || Keratin 7 || 99448	IMAGE:843321	3.60569	2.36989	0.657264	4.03112	0	0.299234
	BACE2 || Beta-site APP-cleaving enzyme 2 || 120566	IMAGE:810454	3.59478	1.99967	0.55627	3.57999	0	0.357813
	YWHAZ || Tyrosine 3-monooxygenase/tryptophan 5-monooxygenase activation protein, zeta polypeptide || 109636	IMAGE:243238	3.59375	1.98367	0.551977	3.86098	0	0.363395
	UPP2 || Uridine phosphorylase 2 || 114740	IMAGE:1534053	3.5909	1.79778	0.500649	3.13618	0	0.378869
	SLC12A7 || Solute carrier family 12 (potassium/chloride transporters), member 7 || 112519	IMAGE:770838	3.5874	1.64411	0.458301	3.07683	0	0.397896
	|| **Transcribed locus, moderately similar to XP_528718.1 similar to cytochrome c [Pan troglodytes] || 99299	IMAGE:40017	3.58349	1.66878	0.465685	3.12226	0	0.419349
	ShrmL || Shroom-related protein || 105487	IMAGE:134948	3.5832	1.66986	0.466026	3.2262	0	0.420941
	KPNA2 || Karyopherin alpha 2 (RAG cohort 1, importin alpha 1) || 105833	IMAGE:882510	3.58285	2.02256	0.56451	4.47457	0	0.42287
	EPS8L3 || EPS8-like 3 || 116131	IMAGE:588057	3.58084	1.83158	0.511493	3.31164	0	0.433916
	|| Similar to Myosin Vb (Myosin 5B) || 98840	IMAGE:743143	3.58027	1.63357	0.45627	3.06814	0	0.43708
	FAP || Fibroblast activation protein, alpha || 115006	IMAGE:323181	3.57881	1.83044	0.511467	3.7819	0	0.445122
	|| || 104875	IMAGE:854189	3.5788	2.27622	0.636029	4.2973	0	0.44519
	ACSL3 || Acyl-CoA synthetase long-chain family member 3 || 110011	IMAGE:310493	3.57698	1.99067	0.556522	3.90877	0	0.455289
	EPS8L3 || EPS8-like 3 || 110327	IMAGE:588033	3.57152	2.59422	0.726364	4.44562	0	0.485671
	AMOTL2 || Angiomotin like 2 || 220204	IMAGE:324772	3.56919	1.84356	0.516519	3.19246	0	0.498652
	SMAD3 || SMAD, mothers against DPP homolog 3 (Drosophila) || 117952	IMAGE:345935	3.56532	1.7565	0.492663	3.51644	0	0.520427
	AKAP6 || A kinase (PRKA) anchor protein 6 || 109229	IMAGE:40844	3.56457	1.69756	0.47623	3.63553	0	0.524648
	YWHAG || Tyrosine 3-monooxygenase/tryptophan 5-monooxygenase activation protein, gamma polypeptide || 99545	IMAGE:784129	3.56396	1.8048	0.506403	3.46016	0	0.52806
	ELF4 || E74-like factor 4 (ets domain transcription factor) || 178249	IMAGE:682418	3.55609	2.94789	0.82897	5.60453	0	0.572732
	|| || 102735	IMAGE:487722	3.55109	1.77402	0.499572	3.30262	0	0.601323
	|| || 311576	IMAGE:2237353	3.55092	1.638	0.461289	3.05832	0	0.602271
	ATAD2 || ATPase family, AAA domain containing 2 || 108090	IMAGE:280375	3.54792	1.85233	0.52209	3.94475	0	0.61955
	MSN || Moesin || 100895	IMAGE:131362	3.54781	2.12078	0.597771	3.77555	0	0.620185
	C10orf42 || Chromosome 10 open reading frame 42 || 226673	IMAGE:1468160	3.54777	1.78254	0.502441	3.18382	0	0.620404
	SLC38A2 || Solute carrier family 38, member 2 || 98705	IMAGE:133454	3.54611	2.41644	0.681435	4.35969	0	0.629982
	IGFBP3 || Insulin-like growth factor binding protein 3 || 114308	IMAGE:898218	3.53289	2.60367	0.736981	4.72561	0	0.707039
	GNAI2 || Guanine nucleotide binding protein (G protein), alpha inhibiting activity polypeptide 2 || 99604	IMAGE:530139	3.53256	1.71167	0.484541	3.14	0	0.708982
	SOX17 || SRY (sex determining region Y)-box 17 || 109642	IMAGE:740416	3.53197	1.78011	0.504	3.5635	0	0.712447
	SOX4 || SRY (sex determining region Y)-box 4 || 225012	IMAGE:250869	3.53173	1.82178	0.515832	3.31683	0	0.713856
	CXCL16 || Chemokine (C-X-C motif) ligand 16 || 105222	IMAGE:730970	3.52869	2.03856	0.57771	3.58249	0	0.731798
	HH114 || Hypothetical protein HH114 || 118199	IMAGE:503926	3.52858	1.64649	0.466616	3.08255	0	0.732441
	|| Transcribed locus || 110157	IMAGE:140966	3.5226	1.77303	0.503331	3.31199	0	0.767926
	PTRF || Polymerase I and transcript release factor || 100129	IMAGE:767993	3.5187	2.266	0.643988	4.89271	0	0.791212
	MAD || MAX dimerization protein 1 || 221743	IMAGE:28373	3.51696	1.74221	0.495373	3.02118	0	0.801631
	SLC38A1 || Solute carrier family 38, member 1 || 112686	IMAGE:35626	3.51362	1.98167	0.563996	3.65555	0	0.821746
	PLEK2 || Pleckstrin 2 || 224262	IMAGE:453710	3.51065	2.31656	0.659866	5.47764	0	0.839697
	PDLIM4 || PDZ and LIM domain 4 || 307626	IMAGE:2056139	3.50804	1.83122	0.522007	3.38816	0	0.855482
	SMS || Spermine synthase || 108346	IMAGE:565235	3.50743	1.78211	0.508096	3.18864	0	0.859221
	KCTD10 || Potassium channel tetramerisation domain containing 10 || 103333	IMAGE:50566	3.50449	1.77156	0.505511	3.16068	0	0.87712
	PGK1 || Phosphoglycerate kinase 1 || 110496	IMAGE:949939	3.50358	1.95756	0.55873	3.94021	0	0.882639
	SHC1 || SHC (Src homology 2 domain containing) transforming protein 1 || 111828	IMAGE:77133	3.50354	1.67778	0.47888	3.01739	0	0.882883
	CaMKIINalpha || Calcium/calmodulin-dependent protein kinase II || 105918	IMAGE:773138	3.5025	1.61735	0.46177	3.19356	0	0.889272
	|| **Homo sapiens, clone IMAGE:5575764, mRNA || 101717	IMAGE:341774	3.49703	2.13578	0.610741	3.79905	0	0.922832
	CXCL16 || Chemokine (C-X-C motif) ligand 16 || 116444	IMAGE:753278	3.49562	1.89847	0.5431	3.28033	0	0.931524
	SLC1A5 || Solute carrier family 1 (neutral amino acid transporter), member 5 || 107821	IMAGE:80910	3.49501	1.95356	0.558955	3.75935	0	0.935258
	TMEM16A || Transmembrane protein 16A || 108758	IMAGE:742679	3.49221	2.20789	0.632233	6.01209	0	0.952626
	SEMA3F || Sema domain, immunoglobulin domain (Ig), short basic domain, secreted, (semaphorin) 3F || 109061	IMAGE:809526	3.48887	2.11616	0.606545	4.10615	0	0.973344
	KRT15 || Keratin 15 || 224826	IMAGE:1474900	3.4862	2.02189	0.57997	3.56844	0	0.990013
	FOXM1 || Forkhead box M1 || 113261	IMAGE:564803	3.47903	1.95295	0.561349	3.81986	0	1.03496
	RNF24 || Ring finger protein 24 || 120627	IMAGE:47169	3.47393	1.87967	0.541078	3.24793	0	1.06722
	|| Transcribed locus, strongly similar to XP_530695.1 LOC461062 [Pan troglodytes] || 98796	IMAGE:1864208	3.47318	1.72078	0.495448	3.17416	0	1.07199
	PERP || PERP, TP53 apoptosis effector || 223403	IMAGE:378365	3.46619	1.68633	0.486509	3.18482	0	1.11655
	RRM2 || Ribonucleotide reductase M2 polypeptide || 109251	IMAGE:624627	3.46097	3.08044	0.890053	7.92291	0	1.15011
	PCDH7 || BH-protocadherin (brain-heart) || 109841	IMAGE:753028	3.4603	1.75578	0.507407	3.84899	0	1.15446
	BUB1 || BUB1 budding uninhibited by benzimidazoles 1 homolog (yeast) || 114729	IMAGE:781047	3.45901	1.92644	0.556936	3.45163	0	1.16279
	CCNA2 || Cyclin A2 || 119100	IMAGE:950690	3.45851	1.88299	0.544451	3.64307	0	1.16599
	ALPI || Alkaline phosphatase, intestinal || 108977	IMAGE:626967	3.45418	1.85856	0.53806	3.66125	0	1.19409
	TncRNA || Trophoblast-derived noncoding RNA || 101875	IMAGE:220376	3.45282	1.81667	0.526141	3.46374	0	1.20295
	|| Transcribed locus, moderately similar to XP_509352.1 similar to hypothetical protein [Pan troglodytes] || 318079	IMAGE:1947827	3.45121	1.78744	0.517919	3.19937	0	1.21344
	|| || 102192	IMAGE:512133	3.45046	2.014	0.583691	3.89702	0	1.21834
	OAS2 || 2'-5'-oligoadenylate synthetase 2, 69/71kDa || 99062	IMAGE:136508	3.4477	2.1553	0.625142	5.43698	0	1.2364
	FLJ43855 || Similar to sodium- and chloride-dependent creatine transporter || 223496	1291956	3.44365	2.08189	0.604559	3.83784	0	1.26299
	LMNB2 || Lamin B2 || 113682	IMAGE:815501	3.43632	2.03878	0.593303	3.96464	0	1.31152
	RGS20 || Regulator of G-protein signalling 20 || 307866	IMAGE:1857088	3.43037	2.054	0.59877	3.84182	0	1.35123
	C21orf56 || **Chromosome 21 open reading frame 56 || 114704	IMAGE:782446	3.42758	1.87233	0.546255	3.39122	0	1.36991
	DXYS155E || DNA segment on chromosome X and Y (unique) 155 expressed sequence || 313550	IMAGE:1912972	3.42487	1.758	0.513304	3.19947	0	1.38815
	TMC5 || Transmembrane channel-like 5 || 309949	IMAGE:594770	3.41815	2.17422	0.636082	4.37243	0	1.43371
	ODF1 || Outer dense fiber of sperm tails 1 || 310807	IMAGE:1854956	3.41518	1.89864	0.555941	3.25889	0	1.45391
	S100A10 || S100 calcium binding protein A10 (annexin II ligand, calpactin I, light polypeptide (p11)) || 119597	IMAGE:756595	3.4151	2.19311	0.64218	4.02939	0	1.45443
	F2R || Coagulation factor II (thrombin) receptor || 108485	IMAGE:813254	3.40523	2.53267	0.743757	4.41336	0	1.5222
	BAZ1A || Bromodomain adjacent to zinc finger domain, 1A || 225334	IMAGE:241077	3.40438	1.63311	0.479709	3.08768	0	1.52811
	EVA1 || Epithelial V-like antigen 1 || 221713	IMAGE:853998	3.39289	1.77989	0.524593	3.27164	0	1.60806
	ANKIB1 || Ankyrin repeat and IBR domain containing 1 || 118971	IMAGE:773261	3.39161	1.58511	0.467363	3.1258	0	1.61709
	SOX17 || SRY (sex determining region Y)-box 17 || 99566	IMAGE:754929	3.39006	1.61017	0.474969	3.25179	0	1.62796
	|| Homo sapiens, clone IMAGE:3881549, mRNA || 114205	IMAGE:143169	3.38467	1.57178	0.464381	3.15767	0	1.66598
	LUZP1 || Leucine zipper protein 1 || 112212	IMAGE:511143	3.38196	1.76111	0.520737	3.10563	0	1.6852
	|| **Transcribed locus || 109080	IMAGE:202919	3.38158	1.97522	0.584113	3.5636	0	1.68794
	TGFB2 || Transforming growth factor, beta 2 || 119864	IMAGE:281778	3.37774	2.40622	0.712376	4.22576	0	1.71525
	CDH11 || Cadherin 11, type 2, OB-cadherin (osteoblast) || 313617	IMAGE:1893136	3.36458	1.73748	0.516403	3.3443	0	1.80998
	DCBLD2 || Discoidin, CUB and LCCL domain containing 2 || 114947	IMAGE:265494	3.36144	1.626	0.483722	3.03321	0	1.83278
	CaMKIINalpha || Calcium/calmodulin-dependent protein kinase II || 106874	IMAGE:261194	3.36007	1.674	0.498204	3.26537	0	1.84273
	ENO1 || Enolase 1, (alpha) || 225063	IMAGE:392678	3.35725	1.686	0.502196	3.01966	0	1.8633
	B2M || Beta-2-microglobulin || 110605	IMAGE:878798	3.35346	1.83089	0.54597	3.17016	0	1.89111
	TM4SF3 || Transmembrane 4 superfamily member 3 || 104425	IMAGE:509731	3.34945	2.027	0.605174	4.38642	0	1.92064
	HMMR || Hyaluronan-mediated motility receptor (RHAMM) || 111558	IMAGE:128947	3.34882	2.03811	0.608605	4.08848	0	1.92528
	CTSZ || Cathepsin Z || 113152	IMAGE:842994	3.34699	2.10293	0.628306	5.60369	0	1.93885
	STAM2 || Signal transducing adaptor molecule (SH3 domain and ITAM motif) 2 || 116479	IMAGE:669371	3.34437	2.68232	0.802042	3.53768	0	1.95828
	CYB5-M || Outer mitochondrial membrane cytochrome b5 || 115591	IMAGE:320509	3.34427	1.87967	0.562055	3.39315	0	1.95898
	|| || 312148	IMAGE:2012021	3.34217	2.79033	0.834887	5.41795	0	1.97463
	FLJ46072 || FLJ46072 protein || 117714	IMAGE:810089	3.34188	1.68256	0.503476	3.03355	0	1.97679
	|| CDNA: FLJ22256 fis, clone HRC02860 || 118589	IMAGE:211758	3.3406	2.03353	0.608732	3.61411	0	1.9863
	LGALS3 || Lectin, galactoside-binding, soluble, 3 (galectin 3) || 112326	IMAGE:855910	3.33758	1.80022	0.53938	3.11559	0	2.0089
	ZNF217 || Zinc finger protein 217 || 121256	1360920	3.33377	1.71556	0.514599	3.03687	0	2.03747
	CDCA2 || Cell division cycle associated 2 || 221827	IMAGE:430973	3.33334	1.983	0.594898	4.03349	0	2.04067
	CPOX || Coproporphyrinogen oxidase || 105144	IMAGE:436062	3.33029	1.63371	0.490561	3.25828	0	2.06369
	|| CDNA clone IMAGE:4152983, partial cds || 306849	IMAGE:1574206	3.32598	1.99876	0.600953	4.21143	0	2.09631
	TACC3 || Transforming, acidic coiled-coil containing protein 3 || 109733	IMAGE:705064	3.32149	1.73089	0.521118	3.29878	0	2.13045
	|| || 310180	IMAGE:449403	3.31914	2.18321	0.657763	4.49422	0	2.14839
	KIAA0877 || KIAA0877 protein || 104472	IMAGE:754111	3.31719	1.71808	0.517933	3.2027	0	2.16329
	UCC1 || Ependymin related protein 1 (zebrafish) || 222592	IMAGE:280699	3.31526	1.60622	0.484493	3.09317	0	2.1781
	RCOR1 || REST corepressor 1 || 105274	IMAGE:815503	3.3117	1.76144	0.531886	3.13435	0	2.20555
	ROD1 || ROD1 regulator of differentiation 1 (S. pombe) || 113266	IMAGE:233666	3.31035	1.74446	0.52697	3.02597	0	2.21592
	S100A11 || S100 calcium binding protein A11 (calgizzarin) || 119990	IMAGE:810612	3.301	2.02191	0.612515	3.58042	0	2.28855
	DKK3 || Dickkopf homolog 3 (Xenopus laevis) || 105080	IMAGE:760299	3.30058	1.70267	0.515869	3.55475	0	2.29185
	HSPA4 || Heat shock 70kDa protein 4 || 117569	IMAGE:773673	3.29785	1.61178	0.488737	3.16829	0	2.31322
	FOLR1 || Folate receptor 1 (adult) || 112825	IMAGE:131839	3.28674	1.52698	0.464589	3.10757	0	2.4008
	PLA2G7 || Phospholipase A2, group VII (platelet-activating factor acetylhydrolase, plasma) || 119974	IMAGE:238821	3.27389	2.07592	0.634083	3.72529	0	2.50346
	CLIC4 || Chloride intracellular channel 4 || 225985	IMAGE:448085	3.27166	1.84533	0.564037	3.114	0	2.52145
	MX1 || Myxovirus (influenza virus) resistance 1, interferon-inducible protein p78 (mouse) || 104876	IMAGE:741991	3.2665	1.58989	0.486727	3.04232	0	2.56315
	LIPH || Lipase, member H || 115883	IMAGE:587388	3.2665	1.77094	0.542153	3.12559	0	2.56316
	GJA1 || Gap junction protein, alpha 1, 43kDa (connexin 43) || 114016	IMAGE:839101	3.26645	1.77822	0.54439	3.15767	0	2.5636
	HLA-F || Major histocompatibility complex, class I, F || 224785	IMAGE:1604703	3.26643	2.20944	0.676409	3.69295	0	2.56372
	|| Transcribed locus || 316414	IMAGE:1950896	3.26452	1.87722	0.575037	3.16711	0	2.57924
	YWHAB || Tyrosine 3-monooxygenase/tryptophan 5-monooxygenase activation protein, beta polypeptide || 113310	IMAGE:208161	3.26215	1.76444	0.540884	3.10524	0	2.59855
	ZHX1 || Zinc fingers and homeoboxes 1 || 222071	IMAGE:433184	3.26053	1.74557	0.535363	3.26874	0	2.61177
	KIAA1949 || KIAA1949 || 110497	IMAGE:208699	3.26023	1.98722	0.609534	3.71144	0	2.6142
	MAP1B || Microtubule-associated protein 1B || 224143	IMAGE:50282	3.25949	2.21144	0.678463	4.8074	0	2.62028
	PLEKHA8 || **Pleckstrin homology domain containing, family A (phosphoinositide binding specific) member 8 || 99338	IMAGE:980356	3.25573	1.71	0.525228	3.20627	0	2.65113
	IL1RN || Interleukin 1 receptor antagonist || 104276	IMAGE:84295	3.25324	2.27489	0.699269	4.17222	0	2.67158
	TTK || TTK protein kinase || 308729	IMAGE:2062329	3.25145	2.21067	0.679902	5.17769	0	2.68633
	JAK2 || Janus kinase 2 (a protein tyrosine kinase) || 314054	IMAGE:2048524	3.24994	1.87598	0.577235	4.05988	0	2.69877
	|| || 120713	IMAGE:67187	3.24708	1.73814	0.535294	3.10412	0	2.72245
	CENPE || Centromere protein E, 312kDa || 120314	IMAGE:727526	3.24321	1.76413	0.543945	3.04472	0	2.75459
	|| || 119594	IMAGE:844954	3.23894	1.98056	0.611483	3.45622	0	2.79025
	MGC15716 || Hypothetical protein MGC15716 || 222175	IMAGE:1473682	3.23619	1.93653	0.5984	3.63679	0	2.81331
	CCNG2 || Cyclin G2 || 108895	IMAGE:823691	3.23441	2.14533	0.663284	4.05635	0	2.82822
	IFIT1 || Interferon-induced protein with tetratricopeptide repeats 1 || 111879	IMAGE:544502	3.2328	1.77422	0.548819	3.96536	0	2.84176
	MSLN || Mesothelin || 308694	IMAGE:1669232	3.23077	1.83616	0.568335	3.60937	0	2.8589
	|| Transcribed locus || 114513	IMAGE:770334	3.22871	1.63622	0.506773	3.2675	0	2.87632
	PGK1 || Phosphoglycerate kinase 1 || 225918	IMAGE:768944	3.22848	1.88744	0.584624	3.58606	0	2.87827
	NELL1 || NEL-like 1 (chicken) || 110288	IMAGE:301504	3.22491	1.88567	0.58472	3.22658	0	2.90855
	MAN2A1 || Mannosidase, alpha, class 2A, member 1 || 111382	IMAGE:212496	3.22088	1.77833	0.552126	3.01089	0	2.94277
	MDM4 || Mdm4, transformed 3T3 cell double minute 4, p53 binding protein (mouse) || 112024	IMAGE:897296	3.21695	1.76589	0.548932	3.46171	0	2.97637
	SAT || Spermidine/spermine N1-acetyltransferase || 309190	IMAGE:897864	3.21325	1.86967	0.581861	3.19369	0	3.00815
	ERN2 || Endoplasmic reticulum to nucleus signalling 2 || 110699	IMAGE:511786	3.20649	2.05822	0.641893	3.63518	0	3.06654
	MKI67 || Antigen identified by monoclonal antibody Ki-67 || 101861	IMAGE:769513	3.20219	2.03497	0.635493	4.21386	0	3.10384
	TM4SF9 || Transmembrane 4 superfamily member 9 || 312147	IMAGE:300099	3.20203	2.20428	0.688399	3.65452	0	3.10521
	SMAD3 || SMAD, mothers against DPP homolog 3 (Drosophila) || 107986	IMAGE:323028	3.19152	1.68644	0.528415	3.18982	0	3.19727
	FLJ12443 || Hypothetical protein FLJ12443 || 106859	IMAGE:201483	3.18309	1.9415	0.609941	4.03409	0	3.27173
	|| CDNA FLJ26120 fis, clone SYN00419 || 110896	IMAGE:141854	3.18066	1.919	0.603333	3.31206	0	3.29335
	BENE || BENE protein || 104363	IMAGE:378955	3.1799	1.97011	0.61955	3.91429	0	3.30011
	ANKRD1 || Ankyrin repeat domain 1 (cardiac muscle) || 225345	IMAGE:1580342	3.17879	2.2047	0.693567	3.9899	0	3.31006
	TSN || Translin || 116626	IMAGE:795936	3.17097	1.76867	0.557768	3.76992	0	3.38008
	|| || 101247	IMAGE:745644	3.16984	1.67936	0.529791	3.13158	0	3.39022
	EVA1 || Epithelial V-like antigen 1 || 113008	IMAGE:1324446	3.16243	1.94742	0.615799	3.58008	0	3.45726
	PGK1 || Phosphoglycerate kinase 1 || 99383	IMAGE:586909	3.16202	2.17411	0.687571	3.45307	0	3.46101
	IFI16 || Interferon, gamma-inducible protein 16 || 100267	IMAGE:824602	3.16099	1.83856	0.581639	3.06926	0	3.47033
	|| || 319355	IMAGE:1947289	3.1586	2.04178	0.646418	4.41274	0	3.49208
	OAS1 || 2',5'-oligoadenylate synthetase 1, 40/46kDa || 308156	IMAGE:588911	3.1501	1.85272	0.588147	3.85422	0	3.56986
	MDK || Midkine (neurite growth-promoting factor 2) || 221607	IMAGE:1574594	3.13737	1.67667	0.534418	3.00844	0	3.68768
	CXCL14 || Chemokine (C-X-C motif) ligand 14 || 113487	IMAGE:345034	3.13418	2.06868	0.660039	3.36138	0	3.71743
	SLC12A2 || Solute carrier family 12 (sodium/potassium/chloride transporters), member 2 || 220581	IMAGE:773337	3.12426	1.8036	0.577288	3.42511	0	3.81059
	ATAD2 || ATPase family, AAA domain containing 2 || 102739	IMAGE:204483	3.1227	1.89398	0.60652	4.08026	0	3.82528
	EMP3 || Epithelial membrane protein 3 || 99802	IMAGE:344272	3.09785	1.90922	0.616305	3.35338	0	4.06323
	EVA1 || Epithelial V-like antigen 1 || 221272	IMAGE:233464	3.09732	1.74087	0.562058	3.6445	0	4.0684
	ADAM12 || A disintegrin and metalloproteinase domain 12 (meltrin alpha) || 108628	IMAGE:627039	3.09324	1.573	0.508528	3.03508	0	4.10803
	C16orf34 || Chromosome 16 open reading frame 34 || 120017	IMAGE:489208	3.09015	1.79033	0.579368	3.01157	0	4.13818
	KIAA1838 || KIAA1838 || 226313	IMAGE:250786	3.0887	2.061	0.667271	3.706	0	4.15235
	TM4SF1 || Transmembrane 4 superfamily member 1 || 106197	IMAGE:511778	3.08225	1.97489	0.64073	3.06517	0	4.21568
	ZNF217 || Zinc finger protein 217 || 107777	IMAGE:147834	3.07952	1.74133	0.565456	3.03103	0	4.24255
	ENO2 || Enolase 2 (gamma, neuronal) || 98916	IMAGE:789147	3.07712	1.95278	0.634611	4.09893	0	4.26626
	|| || 237693	IMAGE:31060	3.06204	1.63475	0.533878	3.10997	0	4.4167
	MLF1IP || MLF1 interacting protein || 224122	IMAGE:814769	3.05504	1.937	0.634034	3.99314	0	4.4872
	G1P2 || Interferon, alpha-inducible protein (clone IFI-15K) || 109909	IMAGE:742132	3.05348	2.52722	0.827653	5.86504	0	4.50302
	|| || 313936	IMAGE:1461274	3.04194	1.81222	0.595745	3.03074	0	4.62057
	|| Homo sapiens, clone IMAGE:5273158, mRNA || 225987	IMAGE:289936	3.03484	1.96922	0.648871	3.71954	0	4.69354
	TNFRSF11B || Tumor necrosis factor receptor superfamily, member 11b (osteoprotegerin) || 117342	IMAGE:665356	3.03254	2.01133	0.663249	3.25841	0	4.71727
	EREG || Epiregulin || 106855	IMAGE:271744	3.03204	2.52144	0.831599	5.55125	0	4.72247
	CDCA5 || Cell division cycle associated 5 || 112817	IMAGE:296155	3.03171	1.91944	0.633122	4.53896	0	4.72587
	C1QTNF6 || C1q and tumor necrosis factor related protein 6 || 99484	IMAGE:128679	3.0232	1.51716	0.501839	3.20529	0	4.8143
	COTL1 || Coactosin-like 1 (Dictyostelium) || 118193	IMAGE:144849	3.02012	2.36433	0.782861	3.72031	0	4.8465
	PKMYT1 || **Protein kinase, membrane associated tyrosine/threonine 1 || 103518	IMAGE:739511	3.0191	1.656	0.548507	3.29537	0	4.85714
	MYADM || Myeloid-associated differentiation marker || 102861	IMAGE:489495	3.0079	2.00122	0.665321	3.71263	0	4.97508
	SH3BGRL3 || SH3 domain binding glutamic acid-rich protein like 3 || 113993	IMAGE:238886	3.0062	1.86002	0.61873	3.68982	0	4.99316
	MGC17330 || HGFL gene || 120321	IMAGE:769796	2.99579	1.74074	0.581061	3.3629	0	5.10403
	CCNB1 || Cyclin B1 || 117109	IMAGE:36374	2.9949	1.61167	0.538137	3.28889	0	5.11356
	MITF || Microphthalmia-associated transcription factor || 119269	IMAGE:291623	2.99439	1.53702	0.513302	3.04559	0	5.1191
	SIAT9 || **ST3 beta-galactoside alpha-2,3-sialyltransferase 5 || 114885	IMAGE:275798	2.98816	1.58738	0.531222	3.01273	0	5.18604
	ENC1 || Ectodermal-neural cortex (with BTB-like domain) || 101323	IMAGE:213651	2.98696	1.774	0.593914	3.02957	0	5.19897
	MCM5 || MCM5 minichromosome maintenance deficient 5, cell division cycle 46 (S. cerevisiae) || 106348	IMAGE:531402	2.97484	1.72422	0.579601	3.18708	0	5.33059
	RGS10 || Regulator of G-protein signalling 10 || 114337	IMAGE:506548	2.96482	1.70989	0.576726	3.63882	0	5.44058
	|| || 221102	IMAGE:448117	2.9561	1.76033	0.595491	3.46163	0	5.5371
	C15orf23 || Chromosome 15 open reading frame 23 || 108023	IMAGE:111812	2.95071	2.64384	0.896	5.14997	0	5.59718
	ANXA8 || Annexin A8 || 99723	IMAGE:666879	2.94818	1.61233	0.54689	3.62189	0	5.62547
	SAA1 || Serum amyloid A1 || 101397	IMAGE:161456	2.94791	2.44889	0.830719	4.44532	0	5.62848
	|| Transcribed locus, moderately similar to NP_149986.1 Thy-1 co-transcribed [Homo sapiens] || 309986	IMAGE:1669672	2.94311	1.867	0.634363	3.37801	0	5.68239
	ALDOA || Aldolase A, fructose-bisphosphate || 105480	IMAGE:878578	2.93841	1.69689	0.577485	3.38317	0	5.73538
	IGFBP1 || Insulin-like growth factor binding protein 1 || 107225	IMAGE:668685	2.93799	2.14256	0.729258	4.26878	0	5.74011
	MFAP5 || Microfibrillar associated protein 5 || 115119	IMAGE:377692	2.93406	2.22313	0.757699	6.80838	0	5.78466
	CENPF || Centromere protein F, 350/400ka (mitosin) || 115397	IMAGE:435076	2.93162	2.3204	0.791508	5.72037	0	5.81234
	FLJ12443 || **Hypothetical protein FLJ12443 || 108869	IMAGE:1098334	2.93147	1.928	0.65769	4.15162	0	5.81401
	SLC7A5 || Solute carrier family 7 (cationic amino acid transporter, y+ system), member 5 || 109438	IMAGE:755578	2.9213	2.23056	0.76355	4.00856	0	5.9303
	CCNB3 || Cyclin B3 || 106450	IMAGE:1699127	2.91998	1.51111	0.517508	3.13436	0	5.94544
	ENO1 || Enolase 1, (alpha) || 316235	IMAGE:1637756	2.90085	1.86422	0.642647	3.03594	0	6.16716
	LRAP || Leukocyte-derived arginine aminopeptidase || 120698	IMAGE:50842	2.89481	2.36011	0.815289	5.78891	0	6.23792
	MTB || More than blood homolog || 102342	IMAGE:122397	2.8896	1.79556	0.621385	3.75936	0	6.29933
	|| || 221945	IMAGE:814341	2.88918	1.85178	0.640935	3.90593	0	6.30429
	MCM6 || MCM6 minichromosome maintenance deficient 6 (MIS5 homolog, S. pombe) (S. cerevisiae) || 309852	IMAGE:1587847	2.8803	1.69989	0.590178	3.74331	0	6.40966
	TNFRSF10B || Tumor necrosis factor receptor superfamily, member 10b || 114707	IMAGE:788185	2.86742	2.01733	0.703536	3.23548	0	6.56395
	SOX4 || SRY (sex determining region Y)-box 4 || 99878	IMAGE:366815	2.86384	2.08133	0.726763	3.72338	0	6.60717
	CDS1 || CDP-diacylglycerol synthase (phosphatidate cytidylyltransferase) 1 || 100381	IMAGE:135630	2.86042	1.62411	0.567788	3.07055	0	6.6486
	KIAA1363 || Arylacetamide deacetylase-like 1 || 315816	IMAGE:1670954	2.856	2.21444	0.775365	3.56603	0	6.70221
	SAT || Spermidine/spermine N1-acetyltransferase || 115150	IMAGE:359835	2.83665	2.11511	0.745638	4.01968	0	6.9398
	CHEK1 || CHK1 checkpoint homolog (S. pombe) || 98780	IMAGE:246524	2.83305	2.22926	0.786876	3.80922	0	6.98438
	TOP2A || Topoisomerase (DNA) II alpha 170kDa || 100279	IMAGE:825470	2.83145	1.63056	0.575873	3.14509	0	7.0043
	EIF4E3 || **Eukaryotic translation initiation factor 4E member 3 || 224630	IMAGE:25391	2.83129	1.87956	0.663851	3.06551	0	7.00625
	ERO1L || ERO1-like (S. cerevisiae) || 120434	IMAGE:810448	2.82848	1.89344	0.669421	3.53382	0	7.04125
	KIAA1363 || Arylacetamide deacetylase-like 1 || 222986	IMAGE:32887	2.82718	1.92743	0.681752	3.20906	0	7.05752
	FLJ40629 || Hypothetical protein FLJ40629 || 184969	IMAGE:824913	2.8029	1.79327	0.639789	3.59346	0	7.36365
	DAF || Decay accelerating factor for complement (CD55, Cromer blood group system) || 224392	IMAGE:431944	2.80006	1.69281	0.604562	3.00598	0	7.39989
	CDH6 || Cadherin 6, type 2, K-cadherin (fetal kidney) || 111928	IMAGE:739155	2.79398	2.187	0.782755	3.7701	0	7.47775
	APOA4 || Apolipoprotein A-IV || 106925	IMAGE:1084278	2.78787	1.83378	0.657771	3.87379	0	7.55642
	CDC2 || Cell division cycle 2, G1 to S and G2 to M || 161703	IMAGE:712505	2.78704	1.94067	0.696318	3.54904	0	7.5671
	|| Similar to chromosome 15 open reading frame 16; cezanne 2 || 110707	IMAGE:278243	2.77599	1.91689	0.690524	3.64865	0	7.71044
	STC2 || Stanniocalcin 2 || 120082	IMAGE:130057	2.77516	1.78789	0.644247	3.82765	0	7.72125
	EPSTI1 || Epithelial stromal interaction 1 (breast) || 316724	IMAGE:1855351	2.7571	1.50742	0.54674	3.05965	0	7.9585
	DGKH || Diacylglycerol kinase, eta || 105232	IMAGE:772373	2.74359	1.98022	0.721763	3.29313	0	8.13832
	GPR110 || G protein-coupled receptor 110 || 98343	IMAGE:1492202	2.73959	1.42411	0.519827	3.08628	0	8.19193
	RAB31 || RAB31, member RAS oncogene family || 110533	IMAGE:295564	2.73461	2.04869	0.749172	3.09213	0	8.25896
	ANKRD1 || Ankyrin repeat domain 1 (cardiac muscle) || 116152	IMAGE:840683	2.71104	2.13378	0.787069	3.73656	0	8.57951
	CDCA8 || Cell division cycle associated 8 || 99561	IMAGE:292936	2.70878	2.71811	1.00344	6.60281	0	8.61059
	KIFC1 || Kinesin family member C1 || 308749	IMAGE:129961	2.70608	1.61328	0.596169	3.43581	0	8.64784
	MLF1IP || MLF1 interacting protein || 101617	IMAGE:782259	2.7047	1.75322	0.648213	3.6813	0	8.66678
	IL11RA || Interleukin 11 receptor, alpha || 105057	IMAGE:1740151	2.69956	1.76567	0.654058	3.36786	0	8.73792
	DLG7 || Discs, large homolog 7 (Drosophila) || 111873	IMAGE:686172	2.69744	2.18156	0.808751	4.16166	0	8.76729
	CXCL3 || Chemokine (C-X-C motif) ligand 3 || 309473	IMAGE:1556433	2.67783	2.01433	0.752226	3.56398	0	9.04151
	FLJ12443 || Hypothetical protein FLJ12443 || 309103	IMAGE:824851	2.65856	1.681	0.632296	3.41246	0	9.31494
	ITGB6 || Integrin, beta 6 || 116343	IMAGE:841207	2.65739	1.62085	0.609939	3.01933	0	9.33166
	VIM || Vimentin || 114407	IMAGE:590323	2.64908	1.57422	0.594252	3.12189	0	9.45097
	F2R || Coagulation factor II (thrombin) receptor || 222380	IMAGE:264692	2.63811	1.97122	0.747211	3.09529	0	9.60964
	CDCA7 || Cell division cycle associated 7 || 111783	IMAGE:753198	2.60076	2.0454	0.786465	4.57406	0.0275001	10.1594
	OAS2 || 2'-5'-oligoadenylate synthetase 2, 69/71kDa || 112895	IMAGE:155806	2.58153	1.57822	0.611352	3.07062	0.0275001	10.4483
	NALP2 || NACHT, leucine rich repeat and PYD containing 2 || 115218	IMAGE:246808	2.57536	1.66028	0.644677	3.54773	0.0275001	10.5417
	LOC144347 || Hypothetical protein LOC144347 || 107801	IMAGE:811581	2.54512	1.66156	0.652839	4.52536	0.0275001	11.0062
	STK17B || Serine/threonine kinase 17b (apoptosis-inducing) || 113075	IMAGE:746148	2.5352	1.86556	0.735861	3.61852	0.0275001	11.1607
	ANXA8 || **Annexin A8 || 113476	IMAGE:118518	2.5338	1.59122	0.627998	3.93745	0.0275001	11.1825
	TFF3 || Trefoil factor 3 (intestinal) || 117726	IMAGE:298417	2.52901	1.87511	0.741442	4.05752	0.0275001	11.2577
	HLA-DQB1 || Major histocompatibility complex, class II, DQ beta 1 || 106670	IMAGE:156097	2.51099	1.79622	0.715345	3.20947	0.0275001	11.5422
	SERPINB5 || Serine (or cysteine) proteinase inhibitor, clade B (ovalbumin), member 5 || 118181	IMAGE:327165	2.49435	1.95645	0.784353	5.99838	0.0275001	11.8081
	KIAA0523 || Hypothetical protein LOC339166 || 119263	IMAGE:50939	2.44387	1.74709	0.714885	3.25553	0.0275001	12.633
	|| Homo sapiens, clone IMAGE:4690669, mRNA || 117198	IMAGE:299394	2.41713	1.68467	0.696968	3.72048	0.0275001	13.0811
	RELN || Reelin || 107318	IMAGE:34888	2.40694	1.39846	0.581011	3.08221	0.0275001	13.254
	HLA-DQB2 || Major histocompatibility complex, class II, DQ beta 2 || 107005	IMAGE:1631863	2.40219	1.59246	0.662918	3.21892	0.0275001	13.3348
	|| || 220876	IMAGE:1553998	2.34136	1.51347	0.646406	3.29367	0.0539569	14.3929
	CIT || Citron (rho-interacting, serine/threonine kinase 21) || 108272	IMAGE:46862	2.33727	1.65733	0.709089	3.14941	0.0539569	14.4655
	SPRR2C || Small proline-rich protein 2C || 98557	IMAGE:729942	2.32623	1.4078	0.605186	3.07109	0.0539569	14.6623
	PI3 || Protease inhibitor 3, skin-derived (SKALP) || 315160	IMAGE:2213824	2.31696	1.73855	0.750358	5.60275	0.0539569	14.8286
	|| Full-length cDNA clone CS0DJ013YM22 of T cells (Jurkat cell line) Cot 10-normalized of Homo sapiens (human) || 100484	IMAGE:133647	2.24144	1.53606	0.685301	3.86631	0.0539569	16.2169
				Negative genes (739)
	Gene ID	Gene Name	Score(d)	Numerator(r)	Denominator(s+s0)	Fold Change	q-value(%)	localfdr(%)
	PDIP || Protein disulfide isomerase-associated 2 || 307444	IMAGE:2017658	-13.6761	-7.55189	0.552195	0.00599546	0	0
	FXYD2 || FXYD domain containing ion transport regulator 2 || 109306	IMAGE:453641	-12.7784	-6.79348	0.531637	0.00931893	0	0
	CPB1 || Carboxypeptidase B1 (tissue) || 308924	IMAGE:2063284	-12.6894	-8.25493	0.650538	0.00369703	0	0
	PNLIPRP1 || Pancreatic lipase-related protein 1 || 116731	IMAGE:328591	-12.5128	-7.72333	0.617236	0.00451014	0	0
	ELA3B || Elastase 3B, pancreatic || 118261	IMAGE:328802	-12.3624	-7.78044	0.629362	0.00475641	0	0
	PRSS3 || Protease, serine, 3 (mesotrypsin) || 307826	IMAGE:1913366	-12.2646	-5.41489	0.441505	0.0240735	0	0.000121498
	CLU || **Clusterin (complement lysis inhibitor, SP-40,40, sulfated glycoprotein 2, testosterone-repressed prostate message 2, apolipoprotein J) || 104956	IMAGE:725877	-11.9361	-5.40256	0.452624	0.0254779	0	0.00489049
	PRSS2 || Protease, serine, 2 (trypsin 2) || 314626	IMAGE:725709	-11.7472	-6.98556	0.594655	0.0089689	0	0.0083116
	ELL2 || Elongation factor, RNA polymerase II, 2 || 104939	IMAGE:1468220	-11.3577	-4.55478	0.40103	0.0417526	0	0.0172682
	ELA3A || Elastase 3A, pancreatic (protease E) || 113684	IMAGE:1412502	-11.304	-6.64556	0.587895	0.00877136	0	0.0187226
	SPINK1 || Serine protease inhibitor, Kazal type 1 || 100837	IMAGE:1412481	-11.1636	-6.55989	0.587613	0.00973268	0	0.0227821
	STXBP6 || Syntaxin binding protein 6 (amisyn) || 98772	IMAGE:788524	-11.0088	-4.12533	0.374732	0.0581196	0	0.0276917
	CPA1 || Carboxypeptidase A1 (pancreatic) || 98684	IMAGE:1412503	-10.6599	-6.912	0.648409	0.00721723	0	0.0403599
	FLJ32115 || Hypothetical protein FLJ32115 || 225805	IMAGE:416479	-10.0727	-6.54411	0.649688	0.0120868	0	0.0651916
	|| || 247154	IMAGE:488945	-9.95146	-6.03067	0.606008	0.0137261	0	0.0704242
	AMY2A || Amylase, alpha 2A; pancreatic || 117330	IMAGE:1412238	-9.87746	-7.361	0.745232	0.0046894	0	0.0735406
	STXBP6 || Syntaxin binding protein 6 (amisyn) || 104532	IMAGE:277042	-9.87076	-4.414	0.44718	0.0490733	0	0.0738188
	CHGB || Chromogranin B (secretogranin 1) || 98560	IMAGE:322148	-9.57275	-4.93698	0.515732	0.03105	0	0.0851419
	KIAA1324 || Maba1 || 307045	IMAGE:1609538	-9.52453	-6.16767	0.647556	0.0152814	0	0.0867108
	ARSE || Arylsulfatase E (chondrodysplasia punctata 1) || 309774	IMAGE:462144	-9.45983	-3.91511	0.413867	0.0644346	0	0.0886566
	CTNND2 || Catenin (cadherin-associated protein), delta 2 (neural plakophilin-related arm-repeat protein) || 118308	IMAGE:43743	-9.40399	-4.894	0.520418	0.0368521	0	0.0901722
	GATM || Glycine amidinotransferase (L-arginine:glycine amidinotransferase) || 104475	IMAGE:42558	-9.33096	-4.02333	0.431181	0.0582495	0	0.0918932
	|| || 307670	IMAGE:1916700	-9.3036	-6.64056	0.713762	0.00997923	0	0.0924527
	PDCD4 || Programmed cell death 4 (neoplastic transformation inhibitor) || 108918	IMAGE:210486	-9.23864	-3.76422	0.407443	0.0697935	0	0.0935739
	GSTA3 || Glutathione S-transferase A3 || 103944	IMAGE:256907	-9.22034	-4.92453	0.534095	0.0326725	0	0.0938334
	PDCD4 || Programmed cell death 4 (neoplastic transformation inhibitor) || 307623	IMAGE:29965	-8.92512	-3.55344	0.39814	0.0812991	0	0.0938483
	SERPINA4 || Serine (or cysteine) proteinase inhibitor, clade A (alpha-1 antiproteinase, antitrypsin), member 4 || 223876	IMAGE:1032774	-8.91894	-5.06856	0.568291	0.0295058	0	0.0937519
	TTR || Transthyretin (prealbumin, amyloidosis type I) || 319021	IMAGE:1868551	-8.77683	-6.65478	0.758221	0.0102091	0	0.0902156
	PLA2G1B || Phospholipase A2, group IB (pancreas) || 115377	IMAGE:1461104	-8.76961	-7.32189	0.834916	0.00452826	0	0.0899634
	ATOH8 || **Atonal homolog 8 (Drosophila) || 102324	IMAGE:301191	-8.73161	-4.9015	0.561352	0.0385548	0	0.0885101
	SLC39A5 || Solute carrier family 39 (metal ion transporter), member 5 || 310830	IMAGE:1582949	-8.63257	-5.03122	0.582819	0.0261255	0	0.0836727
	GSTA2 || Glutathione S-transferase A2 || 107076	IMAGE:82710	-8.62357	-5.23868	0.607484	0.0265498	0	0.0831538
	PROX1 || Prospero-related homeobox 1 || 225644	IMAGE:240133	-8.54746	-3.34355	0.391175	0.0975398	0	0.0781975
	GP2 || Glycoprotein 2 (zymogen granule membrane) || 116865	IMAGE:1412344	-8.52646	-6.30456	0.739411	0.00944285	0	0.0766449
	REG1A || Regenerating islet-derived 1 alpha (pancreatic stone protein, pancreatic thread protein) || 104031	IMAGE:745343	-8.50428	-6.14967	0.723126	0.010808	0	0.0749154
	SV2B || Synaptic vesicle glycoprotein 2B || 115053	IMAGE:2314831	-8.46725	-3.57289	0.421966	0.0813448	0	0.0718151
	|| Similar to Chymotrypsinogen B precursor || 105945	IMAGE:1412504	-8.46186	-6.62726	0.783193	0.00788815	0	0.0713413
	|| CDNA FLJ26031 fis, clone PNC08078 || 101026	IMAGE:248624	-8.2706	-3.31084	0.400314	0.0996862	0	0.0505387
	FGL1 || Fibrinogen-like 1 || 101590	IMAGE:129024	-8.22078	-8.58711	1.04456	0.0035244	0	0.0437411
	SERPINA5 || Serine (or cysteine) proteinase inhibitor, clade A (alpha-1 antiproteinase, antitrypsin), member 5 || 116813	IMAGE:129032	-8.15941	-4.80512	0.588906	0.0403495	0	0.0345092
	SDC2 || Syndecan 2 (heparan sulfate proteoglycan 1, cell surface-associated, fibroglycan) || 105408	IMAGE:210717	-8.10772	-3.27533	0.403977	0.10004	0	0.0259675
	SPARCL1 || SPARC-like 1 (mast9, hevin) || 100661	IMAGE:823871	-8.10161	-3.54578	0.437663	0.082088	0	0.0249103
	SLC39A5 || Solute carrier family 39 (metal ion transporter), member 5 || 100093	IMAGE:416978	-8.07756	-5.47714	0.678069	0.0259204	0	0.0206462
	FBXO2 || F-box protein 2 || 221479	IMAGE:179269	-8.05448	-3.556	0.441493	0.0940389	0	0.0164019
	C16orf30 || Chromosome 16 open reading frame 30 || 110178	IMAGE:1631248	-7.93378	-3.51243	0.442718	0.0928508	0	0
	IMPA2 || Inositol(myo)-1(or 4)-monophosphatase 2 || 105550	IMAGE:32299	-7.91972	-4.75222	0.60005	0.0377358	0	0
	LRIG1 || Leucine-rich repeats and immunoglobulin-like domains 1 || 113367	IMAGE:592594	-7.89851	-3.09033	0.391255	0.114289	0	0
	ALDH1A1 || Aldehyde dehydrogenase 1 family, member A1 || 118798	IMAGE:855624	-7.87005	-4.04922	0.51451	0.0645702	0	0
	DPEP1 || Dipeptidase 1 (renal) || 111213	IMAGE:1456900	-7.78069	-5.08433	0.653455	0.0351649	0	0
	SERPINA5 || Serine (or cysteine) proteinase inhibitor, clade A (alpha-1 antiproteinase, antitrypsin), member 5 || 104497	IMAGE:1323591	-7.74471	-4.81989	0.622346	0.0405836	0	0
	DKFZP564O0823 || DKFZP564O0823 protein || 307365	IMAGE:1635779	-7.71777	-4.06857	0.527169	0.0603363	0	0
	IGFBP7 || Insulin-like growth factor binding protein 7 || 118242	IMAGE:68605	-7.70719	-2.92644	0.379703	0.131426	0	0
	ERO1LB || ERO1-like beta (S. cerevisiae) || 113601	IMAGE:51608	-7.60082	-4.21416	0.554434	0.0487965	0	0
	DKFZP434B0335 || **DKFZP434B0335 protein || 102783	IMAGE:27277	-7.54434	-5.52989	0.732985	0.0213647	0	0
	|| **KIAA1155 protein || 115552	IMAGE:233419	-7.51941	-3.89242	0.51765	0.0659632	0	0
	|| || 110839	IMAGE:878836	-7.50497	-5.46133	0.727696	0.0199536	0	0
	ACAS2L || Acetyl-Coenzyme A synthetase 2 (AMP forming)-like || 184458	IMAGE:291426	-7.46183	-3.50644	0.469918	0.0980968	0	0
	TNS || Tensin || 221065	IMAGE:450523	-7.40386	-2.82492	0.381546	0.137759	0	0
	AQP1 || Aquaporin 1 (channel-forming integral protein, 28kDa) || 101694	IMAGE:51950	-7.38506	-4.37529	0.592452	0.0536357	0	0
	C10orf45 || Chromosome 10 open reading frame 45 || 101797	IMAGE:129125	-7.33228	-3.237	0.441472	0.106002	0	0
	LOC285812 || Hypothetical protein LOC285812 || 310557	IMAGE:29932	-7.27114	-3.5172	0.483721	0.0825194	0	0
	TM4SF2 || Transmembrane 4 superfamily member 2 || 114192	IMAGE:307471	-7.24119	-4.31689	0.596157	0.0533838	0	0
	PDCD4 || Programmed cell death 4 (neoplastic transformation inhibitor) || 111310	IMAGE:132690	-7.23323	-3.50233	0.4842	0.0937049	0	0
	C1S || Complement component 1, s subcomponent || 100666	IMAGE:377346	-7.17417	-3.91511	0.545723	0.0708405	0	0
	|| Hypothetical LOC342979 || 306848	IMAGE:1635978	-7.16165	-2.68182	0.37447	0.151945	0	0
	TTR || Transthyretin (prealbumin, amyloidosis type I) || 106463	IMAGE:129589	-7.13669	-5.44907	0.76353	0.0256475	0	0
	ALB || Albumin || 113519	IMAGE:112397	-7.12039	-4.322	0.606989	0.0497741	0	0
	YARS || Tyrosyl-tRNA synthetase || 106693	IMAGE:841070	-7.12025	-2.17	0.304764	0.223421	0	0
	CPA2 || Carboxypeptidase A2 (pancreatic) || 102335	IMAGE:1412245	-7.10088	-6.80756	0.958691	0.00568426	0	0
	TLE2 || Transducin-like enhancer of split 2 (E(sp1) homolog, Drosophila) || 109875	IMAGE:1473131	-7.02428	-2.54389	0.362156	0.176441	0	0
	BEX1 || Brain expressed, X-linked 1 || 106283	IMAGE:341706	-7.00906	-4.29522	0.61281	0.0508951	0	0
	ELA2A || Elastase 2A || 101849	IMAGE:1412412	-6.99725	-6.42133	0.917694	0.0068797	0	0
	SLC43A1 || Solute carrier family 43, member 1 || 100902	IMAGE:85800	-6.99638	-3.34378	0.477929	0.0974233	0	0
	LOC340542 || NGFRAP1-like 1 || 98809	IMAGE:283089	-6.96533	-3.17177	0.455365	0.105081	0	0
	SLC22A17 || Solute carrier family 22 (organic cation transporter), member 17 || 222577	IMAGE:1456155	-6.95515	-2.84367	0.408858	0.139549	0	0
	APOD || Apolipoprotein D || 102660	IMAGE:159608	-6.91093	-4.36567	0.631705	0.0554974	0	0
	|| Transcribed locus, weakly similar to XP_533604.1 similar to kallikrein 11 isoform 2 precursor [Canis familiaris] || 312027	IMAGE:1031004	-6.80507	-4.78744	0.703511	0.0307299	0	0
	RRAGD || Ras-related GTP binding D || 110466	IMAGE:263002	-6.80118	-2.41447	0.355008	0.190724	0	0
	|| || 101078	IMAGE:233721	-6.79447	-4.74011	0.697643	0.0431125	0	0
	LOC283070 || Hypothetical protein LOC283070 || 224041	IMAGE:460618	-6.76418	-2.85519	0.422105	0.145845	0	0
	MT1G || **Metallothionein 1G || 117946	IMAGE:202535	-6.73793	-3.54744	0.526488	0.0873601	0	0
	HOMER2 || Homer homolog 2 (Drosophila) || 99310	IMAGE:757244	-6.70813	-3.002	0.447517	0.125071	0	0
	CHI3L2 || **Chitinase 3-like 2 || 106269	IMAGE:47043	-6.70107	-3.98416	0.594556	0.0752372	0	0
	ID4 || Inhibitor of DNA binding 4, dominant negative helix-loop-helix protein || 112938	IMAGE:788234	-6.68738	-2.71722	0.406321	0.154529	0	0
	|| KIAA1155 protein || 225900	IMAGE:461670	-6.68593	-2.70511	0.404598	0.152971	0	0
	ADCY4 || Adenylate cyclase 4 || 220543	IMAGE:343923	-6.66728	-1.97744	0.296589	0.254445	0	0
	GATA2 || GATA binding protein 2 || 178003	IMAGE:149809	-6.6399	-3.70576	0.558105	0.0934611	0	0
	|| || 109442	IMAGE:304886	-6.61411	-2.65256	0.401045	0.155661	0	0
	PGCP || Plasma glutamate carboxypeptidase || 99648	IMAGE:796263	-6.60876	-2.21078	0.334522	0.211831	0	0
	SLC4A4 || Solute carrier family 4, sodium bicarbonate cotransporter, member 4 || 115520	IMAGE:787938	-6.59355	-4.43178	0.672139	0.0564753	0	0
	CCL8 || Chemokine (C-C motif) ligand 8 || 308187	IMAGE:1911099	-6.56073	-2.16322	0.329723	0.218815	0	0
	C1R || Complement component 1, r subcomponent || 101922	IMAGE:376416	-6.54615	-3.30644	0.505098	0.110361	0	0
	KIF12 || Kinesin family member 12 || 107435	IMAGE:214205	-6.53845	-3.77674	0.577621	0.0768345	0	0
	PPP1R1B || Protein phosphatase 1, regulatory (inhibitor) subunit 1B (dopamine and cAMP regulated phosphoprotein, DARPP-32) || 121152	IMAGE:277173	-6.53184	-4.09244	0.626537	0.0774074	0	0
	A2M || Alpha-2-macroglobulin || 113214	IMAGE:878182	-6.48861	-3.77822	0.582285	0.0889958	0	0
	GJB1 || Gap junction protein, beta 1, 32kDa (connexin 32, Charcot-Marie-Tooth neuropathy, X-linked) || 99827	IMAGE:288663	-6.46555	-3.33533	0.515862	0.120371	0	0
	|| || 105461	IMAGE:1862450	-6.46539	-3.83744	0.593536	0.0775616	0	0
	RARRES2 || Retinoic acid receptor responder (tazarotene induced) 2 || 111147	IMAGE:756372	-6.46194	-5.66422	0.876551	0.027895	0	0
	PAK3 || P21 (CDKN1A)-activated kinase 3 || 221364	IMAGE:51798	-6.43948	-4.54097	0.705176	0.0346027	0	0
	APCDD1 || Adenomatosis polyposis coli down-regulated 1 || 116573	IMAGE:345670	-6.41171	-3.1076	0.484676	0.115869	0	0
	ANXA9 || Annexin A9 || 108584	IMAGE:245341	-6.40161	-2.18326	0.341048	0.22527	0	0
	SLC7A2 || Solute carrier family 7 (cationic amino acid transporter, y+ system), member 2 || 105196	IMAGE:132140	-6.40035	-3.20889	0.501362	0.109259	0	0
	TIMP3 || Tissue inhibitor of metalloproteinase 3 (Sorsby fundus dystrophy, pseudoinflammatory) || 178285	IMAGE:754106	-6.38594	-4.78022	0.748554	0.0436673	0	0
	|| || 106302	IMAGE:1861777	-6.37452	-3.79844	0.595879	0.0797506	0	0
	RGN || Regucalcin (senescence marker protein-30) || 114261	IMAGE:45099	-6.36334	-3.43714	0.540148	0.0836113	0	0
	SEL1L || Sel-1 suppressor of lin-12-like (C. elegans) || 312469	IMAGE:1667317	-6.35566	-2.60489	0.409853	0.157722	0	0
	SLC43A1 || Solute carrier family 43, member 1 || 106824	IMAGE:83920	-6.34856	-3.59831	0.566791	0.0800092	0	0
	SHC2 || SHC (Src homology 2 domain containing) transforming protein 2 || 114455	IMAGE:46843	-6.34725	-3.08378	0.485845	0.112679	0	0
	|| Transcribed locus || 309459	IMAGE:1620712	-6.30242	-2.76465	0.438665	0.146659	0	0
	F10 || Coagulation factor X || 100266	IMAGE:310519	-6.29943	-2.92088	0.463674	0.142814	0	0
	MT1H || Metallothionein 1H || 100560	IMAGE:214162	-6.29791	-3.56111	0.565443	0.0895601	0	0
	CABC1 || Chaperone, ABC1 activity of bc1 complex like (S. pombe) || 100436	IMAGE:238907	-6.27719	-2.93433	0.467459	0.138022	0	0
	FGFR1 || **Fibroblast growth factor receptor 1 (fms-related tyrosine kinase 2, Pfeiffer syndrome) || 119431	IMAGE:711857	-6.26363	-3.14133	0.50152	0.111033	0	0
	|| MRNA; cDNA DKFZp666B189 (from clone DKFZp666B189) || 312878	IMAGE:896927	-6.2223	-3.53844	0.568671	0.0774929	0	0
	FOXA1 || Forkhead box A1 || 307402	IMAGE:1610546	-6.21975	-2.62889	0.422668	0.163964	0	0
	RASD1 || RAS, dexamethasone-induced 1 || 307161	IMAGE:1635359	-6.20437	-2.95411	0.476134	0.120869	0	0
	MST1 || Macrophage stimulating 1 (hepatocyte growth factor-like) || 105755	IMAGE:193087	-6.15404	-3.12811	0.508302	0.105025	0	0
	APOH || Apolipoprotein H (beta-2-glycoprotein I) || 102535	IMAGE:212188	-6.15283	-2.81878	0.458127	0.153871	0	0
	FGFR1 || Fibroblast growth factor receptor 1 (fms-related tyrosine kinase 2, Pfeiffer syndrome) || 101364	IMAGE:154472	-6.13953	-2.94122	0.479063	0.130847	0	0
	EPB41L4B || Erythrocyte membrane protein band 4.1 like 4B || 119173	IMAGE:242698	-6.12305	-3.05144	0.498354	0.112911	0	0
	GNG4 || Guanine nucleotide binding protein (G protein), gamma 4 || 310772	IMAGE:1911864	-6.1198	-2.66667	0.435744	0.151086	0	0
	SCAMP5 || Secretory carrier membrane protein 5 || 223036	IMAGE:969650	-6.11668	-3.68756	0.602868	0.0875988	0	0
	MARCKSL1 || MARCKS-like 1 || 309490	IMAGE:1600221	-6.10812	-3.03618	0.497073	0.119683	0	0
	BEX2 || Brain expressed X-linked 2 || 112892	IMAGE:810367	-6.10296	-2.72933	0.447215	0.139944	0	0
	STXBP6 || Syntaxin binding protein 6 (amisyn) || 117256	IMAGE:49227	-6.08952	-3.44	0.564905	0.102553	0	0
	FGL1 || Fibrinogen-like 1 || 119433	IMAGE:454771	-6.07606	-6.14378	1.01115	0.0145262	0	0
	FZD4 || Frizzled homolog 4 (Drosophila) || 224908	IMAGE:454698	-6.07424	-2.39078	0.393593	0.195096	0	0
	CHGA || Chromogranin A (parathyroid secretory protein 1) || 310606	IMAGE:1585535	-6.07019	-6.71089	1.10555	0.0213358	0	0
	NPTX2 || Neuronal pentraxin II || 115550	IMAGE:971372	-6.06297	-2.89289	0.47714	0.125363	0	0
	PODN || Podocan || 110328	IMAGE:782701	-6.06048	-2.81969	0.465258	0.14339	0	0
	SOD3 || Superoxide dismutase 3, extracellular || 117918	1343732	-6.02339	-3.42756	0.569041	0.109176	0	0
	CLPS || Colipase, pancreatic || 106149	IMAGE:73782	-5.98749	-5.47844	0.914982	0.014702	0	0
	TMED6 || Transmembrane emp24 protein transport domain containing 6 || 221122	IMAGE:460798	-5.9609	-4.89856	0.821782	0.0251712	0	0
	|| || 225828	IMAGE:266500	-5.94132	-2.83179	0.476626	0.1447	0	0
	FLRT2 || Fibronectin leucine rich transmembrane protein 2 || 308639	IMAGE:1932984	-5.92171	-3.10244	0.52391	0.103548	0	0
	VCAM1 || Vascular cell adhesion molecule 1 || 104652	IMAGE:49164	-5.91217	-4.68291	0.792081	0.0421996	0	0
	CXCL12 || Chemokine (C-X-C motif) ligand 12 (stromal cell-derived factor 1) || 312914	IMAGE:2239290	-5.90099	-3.07678	0.521401	0.122811	0	0
	CSPG5 || Chondroitin sulfate proteoglycan 5 (neuroglycan C) || 308733	IMAGE:2017674	-5.90064	-3.98478	0.675313	0.0705008	0	0
	HOOK1 || Hook homolog 1 (Drosophila) || 226147	IMAGE:845454	-5.89866	-2.16156	0.366448	0.219112	0	0
	RAB26 || RAB26, member RAS oncogene family || 311662	IMAGE:1911343	-5.87447	-3.262	0.555284	0.0909106	0	0
	FKBP11 || FK506 binding protein 11, 19 kDa || 108749	IMAGE:291097	-5.85426	-2.00522	0.342524	0.244004	0	0
	LOC284014 || Similar to RIKEN cDNA C730027E14 || 100578	IMAGE:1636162	-5.84438	-2.6279	0.449646	0.156368	0	0
	SEMA6C || Sema domain, transmembrane domain (TM), and cytoplasmic domain, (semaphorin) 6C || 224530	IMAGE:1581507	-5.8426	-1.97789	0.338529	0.256953	0	0
	GALK2 || Galactokinase 2 || 312666	IMAGE:1868590	-5.84091	-2.16287	0.370296	0.21487	0	0
	GYPC || Glycophorin C (Gerbich blood group) || 107066	IMAGE:344720	-5.8397	-2.859	0.48958	0.141939	0	0
	NR0B2 || Nuclear receptor subfamily 0, group B, member 2 || 99325	IMAGE:418138	-5.83272	-3.6919	0.632964	0.0943634	0	0
	MT1K || Metallothionein 1K || 307281	IMAGE:126458	-5.82946	-2.85122	0.489106	0.129471	0	0
	|| Hypothetical LOC389185 || 310211	IMAGE:1606290	-5.82214	-2.3699	0.407051	0.184614	0	0
	MAWBP || MAWD binding protein || 114115	IMAGE:39178	-5.818	-2.34744	0.40348	0.193995	0	0
	MT1F || Metallothionein 1F (functional) || 102953	IMAGE:245990	-5.80982	-2.71233	0.466854	0.148116	0	0
	CRIP2 || Cysteine-rich protein 2 || 309445	IMAGE:1607152	-5.79049	-2.87771	0.496972	0.137526	0	0
	ETV2 || Ets variant gene 2 || 104449	IMAGE:1468722	-5.77909	-2.31767	0.401044	0.194074	0	0
	MGC61550 || Hypothetical protein MGC61550 || 223374	IMAGE:1055459	-5.75607	-2.3309	0.404947	0.190072	0	0
	KLF11 || Kruppel-like factor 11 || 223655	IMAGE:854789	-5.75468	-1.96836	0.342044	0.254048	0	0
	|| || 310380	IMAGE:1555659	-5.74775	-2.83111	0.49256	0.138278	0	0
	AZGP1 || Alpha-2-glycoprotein 1, zinc || 118948	IMAGE:1456160	-5.74118	-4.52044	0.787372	0.0602649	0	0
	ELN || Elastin (supravalvular aortic stenosis, Williams-Beuren syndrome) || 116211	IMAGE:810934	-5.73911	-2.72256	0.474387	0.141709	0	0
	SERPINA3 || Serine (or cysteine) proteinase inhibitor, clade A (alpha-1 antiproteinase, antitrypsin), member 3 || 310136	IMAGE:450533	-5.73684	-5.288	0.921761	0.0208694	0	0
	DLK1 || Delta-like 1 homolog (Drosophila) || 247798	IMAGE:296815	-5.72376	-4.42288	0.772722	0.0664975	0	0
	GYLTL1B || Glycosyltransferase-like 1B || 224925	IMAGE:703810	-5.71631	-2.80995	0.491567	0.161492	0	0
	|| MRNA; cDNA DKFZp686A11113 (from clone DKFZp686A11113) || 308577	IMAGE:1642069	-5.69381	-3.31133	0.581567	0.0932723	0	0
	RASGEF1C || RasGEF domain family, member 1C || 308327	IMAGE:1609616	-5.69218	-2.57211	0.451868	0.173988	0	0
	FLJ43663 || Hypothetical protein FLJ43663 || 309076	IMAGE:1605071	-5.68194	-1.64159	0.288913	0.316746	0	0
	FBXW8 || F-box and WD-40 domain protein 8 || 112919	IMAGE:1604765	-5.68117	-2.41179	0.424523	0.197874	0	0
	FLRT2 || Fibronectin leucine rich transmembrane protein 2 || 225604	IMAGE:375741	-5.67955	-3.5282	0.621212	0.0763422	0	0
	PAH || Phenylalanine hydroxylase || 101442	IMAGE:461727	-5.67843	-3.3035	0.581762	0.0993933	0	0
	C17orf28 || Chromosome 17 open reading frame 28 || 102726	IMAGE:79726	-5.67063	-2.298	0.405246	0.201314	0	0
	RRAGD || Ras-related GTP binding D || 226696	IMAGE:845432	-5.64809	-2.37744	0.420929	0.208673	0	0
	DKFZP564O0823 || DKFZP564O0823 protein || 106632	IMAGE:561851	-5.58868	-2.46211	0.440553	0.182357	0	0
	NUCB2 || Nucleobindin 2 || 111956	IMAGE:815794	-5.58121	-2.67278	0.478889	0.16018	0	0
	GPX3 || Glutathione peroxidase 3 (plasma) || 108603	IMAGE:855523	-5.56252	-2.277	0.409347	0.2009	0	0
	BAALC || Brain and acute leukemia, cytoplasmic || 311379	IMAGE:49923	-5.56152	-3.21241	0.577613	0.109077	0	0
	ANXA9 || Annexin A9 || 226202	IMAGE:239568	-5.55865	-2.033	0.365736	0.236766	0	0
	FLJ21934 || Hypothetical protein FLJ21934 || 221233	IMAGE:452708	-5.55458	-3.13033	0.563559	0.127649	0	0
	C9orf3 || Chromosome 9 open reading frame 3 || 111076	IMAGE:811149	-5.53182	-2.43111	0.439478	0.182439	0	0
	APOD || Apolipoprotein D || 107599	IMAGE:838611	-5.52397	-3.08822	0.559059	0.124513	0	0
	|| Transcribed locus, strongly similar to XP_516465.1 macrophage stimulating 1 (hepatocyte growth factor-like) [Pan troglodytes] || 220905	1276614	-5.51472	-3.70022	0.670972	0.0659727	0	0
	FBLN5 || Fibulin 5 || 226876	IMAGE:50483	-5.5111	-3.44256	0.624658	0.114578	0	0
	CHDH || Choline dehydrogenase || 226646	IMAGE:240988	-5.50521	-2.40189	0.436293	0.191565	0	0
	SCG3 || Secretogranin III || 221142	IMAGE:858401	-5.4909	-3.33113	0.606663	0.106857	0	0
	FLJ20152 || Hypothetical protein FLJ20152 || 307684	IMAGE:1534008	-5.48521	-2.25501	0.411108	0.219517	0	0
	PBX1 || Pre-B-cell leukemia transcription factor 1 || 98389	IMAGE:200656	-5.47534	-2.52156	0.46053	0.178067	0	0
	DKFZP586A0522 || DKFZP586A0522 protein || 225252	IMAGE:450938	-5.46063	-3.62811	0.664413	0.0910929	0	0
	|| || 318934	IMAGE:1868222	-5.45098	-1.69989	0.31185	0.305715	0	0
	IL17RB || Interleukin 17 receptor B || 184495	IMAGE:429376	-5.41314	-3.19693	0.590587	0.130184	0	0
	EPAS1 || Endothelial PAS domain protein 1 || 99266	IMAGE:131979	-5.39942	-2.57189	0.476327	0.176227	0	0
	|| Transcribed locus || 114302	IMAGE:234444	-5.37722	-2.82488	0.525342	0.142902	0	0
	WBSCR14 || Williams Beuren syndrome chromosome region 14 || 104174	IMAGE:128426	-5.37283	-3.60333	0.670658	0.0980039	0	0
	|| || 103747	IMAGE:743537	-5.37234	-2.28284	0.424924	0.198098	0	0
	TSC || Hypothetical protein FLJ20607 || 220494	IMAGE:745490	-5.37204	-2.54472	0.473698	0.170909	0	0
	|| || 315840	IMAGE:1695115	-5.36887	-1.87551	0.349331	0.267581	0	0
	RNASE1 || Ribonuclease, RNase A family, 1 (pancreatic) || 119331	IMAGE:840493	-5.36541	-3.775	0.703581	0.0705174	0	0
	|| || 310611	IMAGE:1581401	-5.35703	-2.22778	0.415861	0.20629	0	0
	RUTBC3 || RUN and TBC1 domain containing 3 || 224583	IMAGE:1583501	-5.34857	-1.909	0.356918	0.259055	0	0
	|| || 306823	IMAGE:449328	-5.33786	-2.6904	0.504021	0.151423	0	0
	CPLX2 || Complexin 2 || 116182	IMAGE:46477	-5.31307	-3.44963	0.649271	0.0884788	0	0
	ARHGEF4 || Rho guanine nucleotide exchange factor (GEF) 4 || 221348	IMAGE:51711	-5.31256	-2.24591	0.422755	0.205678	0	0
	PON3 || Paraoxonase 3 || 107769	IMAGE:199180	-5.30751	-3.08454	0.581166	0.14608	0	0
	LRP4 || Low density lipoprotein receptor-related protein 4 || 311064	IMAGE:2017535	-5.30529	-3.50733	0.661101	0.103647	0	0
	DCDC2 || Doublecortin domain containing 2 || 114244	IMAGE:490329	-5.3	-2.4147	0.455605	0.177509	0	0
	PDLIM3 || PDZ and LIM domain 3 || 226683	IMAGE:1584628	-5.28734	-2.91497	0.551311	0.141717	0	0
	IGSF4 || Immunoglobulin superfamily, member 4 || 223574	IMAGE:283191	-5.27691	-2.75363	0.521826	0.137997	0	0
	ABCA5 || ATP-binding cassette, sub-family A (ABC1), member 5 || 100992	IMAGE:48518	-5.2744	-2.62656	0.497982	0.150144	0	0
	CTRL || Chymotrypsin-like || 309875	IMAGE:2060266	-5.26795	-3.83178	0.727375	0.0567428	0	0
	HAAO || 3-hydroxyanthranilate 3,4-dioxygenase || 110285	IMAGE:109310	-5.26764	-2.14598	0.407389	0.225893	0	0
	LOC90410 || **Intraflagellar transport protein IFT20 || 104412	IMAGE:292388	-5.2674	-2.43889	0.463016	0.176882	0	0
	FLJ38508 || Aldehyde dehydrogenase 1 family, member L2 || 114153	IMAGE:376643	-5.26645	-3.64189	0.691527	0.109182	0	0
	FN5 || FN5 protein || 223713	IMAGE:815737	-5.25664	-2.57333	0.48954	0.167175	0	0
	ADRA2A || Adrenergic, alpha-2A-, receptor || 119530	IMAGE:69935	-5.25503	-2.28694	0.435192	0.216573	0	0
	|| || 108051	IMAGE:128202	-5.24193	-2.166	0.413207	0.22107	0	0
	C7 || Complement component 7 || 101391	IMAGE:898122	-5.23055	-1.80767	0.345598	0.284817	0	0
	NTRK2 || Neurotrophic tyrosine kinase, receptor, type 2 || 223932	IMAGE:452016	-5.22389	-2.91056	0.557162	0.135355	0	0
	PDE8B || Phosphodiesterase 8B || 103810	IMAGE:282688	-5.2227	-2.68688	0.514461	0.16994	0	0
	ZNF395 || Zinc finger protein 395 || 223588	IMAGE:744983	-5.22188	-1.96884	0.377037	0.258324	0	0
	DKFZP566N034 || Hypothetical protein DKFZp566N034 || 117690	IMAGE:786580	-5.20306	-2.35383	0.452394	0.195268	0	0
	PECAM1 || Platelet/endothelial cell adhesion molecule (CD31 antigen) || 101409	IMAGE:130541	-5.18505	-2.50411	0.482948	0.179565	0	0
	EML1 || Echinoderm microtubule associated protein like 1 || 116207	IMAGE:784360	-5.18383	-3.45633	0.666753	0.104291	0	0
	|| || 116127	IMAGE:1567985	-5.18347	-2.47992	0.478428	0.18083	0	0
	TPD52 || Tumor protein D52 || 186303	IMAGE:701766	-5.17996	-1.94391	0.375274	0.25816	0	0
	PELI2 || Pellino homolog 2 (Drosophila) || 104748	IMAGE:285377	-5.14819	-2.92411	0.567988	0.151745	0	0
	ADCY5 || Adenylate cyclase 5 || 223171	IMAGE:1031967	-5.14518	-2.05697	0.399786	0.241669	0	0
	RRAGD || Ras-related GTP binding D || 317206	IMAGE:1686766	-5.10838	-2.51954	0.493218	0.187603	0	0
	FGFR3 || Fibroblast growth factor receptor 3 (achondroplasia, thanatophoric dwarfism) || 109661	IMAGE:752631	-5.10679	-2.07733	0.406779	0.232492	0	0
	PBX1 || Pre-B-cell leukemia transcription factor 1 || 109255	IMAGE:212542	-5.09105	-3.36884	0.661718	0.128351	0	0
	|| || 311066	IMAGE:1639441	-5.0871	-3.28436	0.645625	0.125994	0	0
	EDNRB || Endothelin receptor type B || 113651	IMAGE:49665	-5.08519	-2.13544	0.419934	0.241876	0	0
	PTPN21 || Protein tyrosine phosphatase, non-receptor type 21 || 308094	IMAGE:510729	-5.07091	-3.02463	0.596466	0.129801	0	0
	RBP4 || Retinol binding protein 4, plasma || 106711	IMAGE:85805	-5.06238	-3.1752	0.627214	0.10962	0	0
	TFPT || TCF3 (E2A) fusion partner (in childhood Leukemia) || 308498	IMAGE:1605473	-5.05954	-2.02831	0.400888	0.260572	0	0
	TCEA3 || Transcription elongation factor A (SII), 3 || 98634	IMAGE:128738	-5.05606	-2.59222	0.512696	0.155369	0	0
	BACE1 || Beta-site APP-cleaving enzyme 1 || 116866	IMAGE:786069	-5.05493	-3.31833	0.656455	0.0836915	0	0
	RNF144 || Ring finger protein 144 || 112474	IMAGE:415191	-5.05195	-2.57789	0.510276	0.172583	0	0
	CYB5 || Cytochrome b-5 || 107636	IMAGE:196189	-5.04607	-2.24089	0.444086	0.205885	0	0
	GKAP1 || G kinase anchoring protein 1 || 221754	IMAGE:1055817	-5.03929	-1.84811	0.366741	0.286602	0	0
	PLA2G7 || **Phospholipase A2, group VII (platelet-activating factor acetylhydrolase, plasma) || 102941	IMAGE:758284	-5.03057	-1.74733	0.347343	0.28978	0	0
	FOXA3 || Forkhead box A3 || 113169	IMAGE:201288	-5.02231	-2.59211	0.51612	0.163063	0	0
	|| || 222099	IMAGE:845609	-5.01976	-2.3296	0.464086	0.181013	0	0
	MPP1 || Membrane protein, palmitoylated 1, 55kDa || 113265	IMAGE:296880	-5.018	-2.06167	0.410854	0.239274	0	0
	PCDH17 || Hypothetical protein LOC144997 || 222356	IMAGE:1579610	-5.01358	-2.26833	0.452438	0.195667	0	0
	FBLN1 || Fibulin 1 || 116552	IMAGE:502367	-5.00086	-2.47696	0.495306	0.201874	0	0
	|| || 120986	IMAGE:67769	-4.99226	-2.73239	0.547326	0.136176	0	0
	EDN3 || Endothelin 3 || 98649	IMAGE:66532	-4.97965	-3.43941	0.690693	0.0915352	0	0
	EPAS1 || Endothelial PAS domain protein 1 || 116365	IMAGE:869187	-4.97397	-2.51489	0.50561	0.169038	0	0
	DKFZP434B044 || Cysteine-rich secretory protein LCCL domain containing 2 || 113575	IMAGE:795758	-4.97362	-2.45688	0.493981	0.187978	0	0
	CISH || Cytokine inducible SH2-containing protein || 116288	IMAGE:771058	-4.96978	-2.05178	0.412851	0.228636	0	0
	SEL1L || Sel-1 suppressor of lin-12-like (C. elegans) || 114085	IMAGE:81578	-4.9443	-2.44456	0.494419	0.165848	0	0
	RGS16 || Regulator of G-protein signalling 16 || 115991	IMAGE:813707	-4.93999	-2.24968	0.455403	0.209455	0	0
	GATA2 || GATA binding protein 2 || 116521	IMAGE:135688	-4.93776	-2.55771	0.51799	0.190668	0	0
	|| || 111640	IMAGE:378461	-4.93141	-4.84356	0.982184	0.0365513	0	0
	PDGFD || DNA-damage inducible protein 1 || 308399	IMAGE:1626304	-4.92891	-3.13	0.635029	0.110535	0	0
	ABCC8 || ATP-binding cassette, sub-family C (CFTR/MRP), member 8 || 224616	IMAGE:1558108	-4.92361	-2.6783	0.54397	0.154993	0	0
	COX7A1 || Cytochrome c oxidase subunit VIIa polypeptide 1 (muscle) || 307888	IMAGE:1475803	-4.91943	-2.04689	0.416083	0.233185	0	0
	SEL1L || Sel-1 suppressor of lin-12-like (C. elegans) || 307947	IMAGE:824692	-4.90912	-2.51783	0.512888	0.163795	0	0
	LOC387763 || Hypothetical LOC387763 || 307597	IMAGE:1635203	-4.90439	-4.57489	0.932816	0.0672743	0	0
	DKFZp761B107 || Hypothetical protein DKFZp761B107 || 119453	IMAGE:359647	-4.89211	-2.24844	0.459606	0.20312	0	0
	PBX1 || Pre-B-cell leukemia transcription factor 1 || 119414	IMAGE:741880	-4.89158	-1.6089	0.328912	0.327536	0	0
	FLJ10521 || Hypothetical protein FLJ10521 || 308176	IMAGE:50777	-4.89025	-1.80689	0.369488	0.2831	0	0
	LOC202781 || Hypothetical protein LOC202781 || 188319	IMAGE:1671114	-4.88318	-1.99429	0.4084	0.261356	0	0
	|| || 314380	IMAGE:1517876	-4.88075	-1.63319	0.334619	0.325176	0	0
	GATA4 || GATA binding protein 4 || 115846	IMAGE:781738	-4.87844	-3.29111	0.674624	0.102402	0	0
	LOC120376 || Hypothetical protein LOC120376 || 307075	IMAGE:1655480	-4.87542	-2.60308	0.533919	0.181133	0	0
	TncRNA || Trophoblast-derived noncoding RNA || 109489	IMAGE:743230	-4.86122	-2.49356	0.512949	0.189317	0	0
	PDK4 || Pyruvate dehydrogenase kinase, isoenzyme 4 || 109284	IMAGE:78946	-4.85938	-3.59056	0.738891	0.0835136	0	0
	|| || 163427	IMAGE:251047	-4.85162	-3.11833	0.642741	0.0963221	0	0
	ABCA5 || **ATP-binding cassette, sub-family A (ABC1), member 5 || 106023	IMAGE:755240	-4.84518	-2.37817	0.490833	0.181698	0	0
	|| Transcribed locus || 221982	IMAGE:460435	-4.84317	-2.12444	0.438648	0.219839	0	0
	ENPP2 || Ectonucleotide pyrophosphatase/phosphodiesterase 2 (autotaxin) || 310309	IMAGE:785351	-4.83208	-3.00322	0.621518	0.150123	0	0
	DMD || Dystrophin (muscular dystrophy, Duchenne and Becker types) || 310137	IMAGE:773399	-4.82945	-3.01033	0.623328	0.140682	0	0
	|| CDNA FLJ38039 fis, clone CTONG2013934 || 106607	IMAGE:342753	-4.8276	-2.14089	0.443469	0.223707	0	0
	VAV3 || Vav 3 oncogene || 109541	IMAGE:415229	-4.81443	-3.36453	0.698844	0.144003	0	0
	GJA12 || Gap junction protein, alpha 12, 47kDa || 309938	IMAGE:1933127	-4.80363	-2.57578	0.536214	0.15777	0	0
	|| Transcribed locus || 102762	IMAGE:194155	-4.80359	-1.89133	0.393733	0.272427	0	0
	DKFZP586A0522 || DKFZP586A0522 protein || 114324	IMAGE:70152	-4.79992	-3.31067	0.689733	0.114171	0	0
	SLC39A8 || Solute carrier family 39 (zinc transporter), member 8 || 226218	IMAGE:506361	-4.78892	-1.65156	0.34487	0.315391	0	0
	MGC17299 || Hypothetical protein MGC17299 || 220847	IMAGE:854691	-4.7686	-2.16822	0.454688	0.208914	0	0
	PTPRN || Protein tyrosine phosphatase, receptor type, N || 117477	IMAGE:33941	-4.76603	-4.32189	0.906811	0.0725026	0	0
	C9orf75 || Chromosome 9 open reading frame 75 || 118240	IMAGE:358936	-4.76097	-2.53391	0.532226	0.154762	0	0
	|| || 221981	IMAGE:435319	-4.75261	-2.09411	0.440623	0.219035	0	0
	LEAP-2 || Liver-expressed antimicrobial peptide 2 || 119353	IMAGE:197794	-4.75146	-1.62256	0.341486	0.323935	0	0
	ZNF11B || Zinc finger protein 11b (KOX 2) || 161494	IMAGE:346902	-4.74186	-1.73411	0.365703	0.303685	0	0
	|| Transcribed locus, weakly similar to XP_533509.1 similar to ORF2 [Canis familiaris] || 319768	IMAGE:1940641	-4.70071	-2.94775	0.627085	0.103269	0	0
	PTP4A3 || Protein tyrosine phosphatase type IVA, member 3 || 108099	IMAGE:375827	-4.69698	-3.12622	0.665581	0.11245	0	0
	MTRF1 || Mitochondrial translational release factor 1 || 308956	IMAGE:1916771	-4.68943	-2.12111	0.452318	0.219457	0	0
	|| || 248886	IMAGE:33267	-4.68784	-3.93944	0.840354	0.104199	0	0
	KCNJ8 || Potassium inwardly-rectifying channel, subfamily J, member 8 || 108295	IMAGE:754400	-4.67368	-3.215	0.687895	0.0991082	0	0
	RGMA || RGM domain family, member A || 226855	IMAGE:743829	-4.65607	-4.02717	0.864929	0.0934041	0	0
	FLJ23825 || Hypothetical protein FLJ23825 || 308062	IMAGE:1593547	-4.65456	-1.975	0.424315	0.244829	0	0
	MCOLN3 || Mucolipin 3 || 106815	IMAGE:594850	-4.64325	-2.15745	0.464643	0.214895	0	0
	PRKD1 || Protein kinase D1 || 107660	IMAGE:284001	-4.6359	-1.82722	0.394145	0.272426	0	0
	MGC52110 || Hypothetical protein MGC52110 || 308139	IMAGE:1537001	-4.61149	-1.81856	0.394353	0.282722	0	0
	DKFZP566N034 || Hypothetical protein DKFZp566N034 || 318152	IMAGE:1908824	-4.61079	-2.43018	0.527063	0.184578	0	0
	RGS5 || Regulator of G-protein signalling 5 || 100957	IMAGE:853809	-4.60984	-2.64563	0.57391	0.171548	0	0
	ADH1C || Alcohol dehydrogenase 1C (class I), gamma polypeptide || 319047	IMAGE:2095066	-4.60927	-2.75331	0.597341	0.134161	0	0
	|| Transcribed locus || 113728	IMAGE:232586	-4.60668	-1.87756	0.407572	0.263808	0	0
	CXXC5 || CXXC finger 5 || 117459	IMAGE:139354	-4.60513	-2.37789	0.516356	0.178869	0	0
	GAS2L1 || Growth arrest-specific 2 like 1 || 108937	IMAGE:37449	-4.59808	-2.174	0.472807	0.230042	0	0
	PAK3 || P21 (CDKN1A)-activated kinase 3 || 311901	IMAGE:1690003	-4.59474	-2.89389	0.629827	0.111947	0	0
	|| || 226662	IMAGE:395573	-4.59467	-1.69149	0.368142	0.307007	0	0
	COL8A1 || Collagen, type VIII, alpha 1 || 99351	IMAGE:1472775	-4.59328	-3.27833	0.713723	0.081535	0	0
	MT1E || Metallothionein 1E (functional) || 101470	IMAGE:1472735	-4.57996	-2.20178	0.480742	0.212932	0	0
	CYP11B1 || Cytochrome P450, family 11, subfamily B, polypeptide 1 || 119941	IMAGE:1467195	-4.57707	-3.61589	0.79	0.0592973	0	0
	SLC41A1 || Solute carrier family 41, member 1 || 221244	IMAGE:462849	-4.57158	-2.13109	0.46616	0.214798	0	0
	MPP7 || Membrane protein, palmitoylated 7 (MAGUK p55 subfamily member 7) || 312883	IMAGE:1656557	-4.56551	-2.55157	0.558879	0.201146	0	0
	TIP120B || TBP-interacting protein || 226371	IMAGE:344006	-4.56481	-2.97865	0.652523	0.17626	0	0
	P8 || P8 protein (candidate of metastasis 1) || 106252	IMAGE:80484	-4.56144	-2.80667	0.615303	0.137072	0	0
	FLJ20010 || Hypothetical protein FLJ20010 || 116299	IMAGE:302972	-4.54904	-2.06963	0.454959	0.254726	0	0
	XPR1 || Xenotropic and polytropic retrovirus receptor || 222987	IMAGE:279824	-4.54407	-1.63898	0.360686	0.316649	0	0
	SEPX1 || Selenoprotein X, 1 || 309170	IMAGE:1492463	-4.54214	-2.21333	0.487288	0.201114	0	0
	NID2 || Nidogen 2 (osteonidogen) || 311780	IMAGE:1091308	-4.53499	-2.93244	0.646627	0.109011	0	0
	MRC1L1 || **Mannose receptor, C type 1-like 1 || 100604	IMAGE:48886	-4.53025	-3.03051	0.668949	0.156687	0	0
	SIAT7F || ST6 (alpha-N-acetyl-neuraminyl-2,3-beta-galactosyl-1,3)-N-acetylgalactosaminide alpha-2,6-sialyltransferase 6 || 220439	IMAGE:878175	-4.52894	-1.69744	0.374799	0.30379	0	0
	DZIP1 || DAZ interacting protein 1 || 104492	IMAGE:298104	-4.52541	-2.54827	0.563101	0.153033	0	0
	DSCR1L1 || Down syndrome critical region gene 1-like 1 || 105279	IMAGE:51408	-4.52329	-2.31978	0.512852	0.229821	0	0
	GAS1 || Growth arrest-specific 1 || 119648	IMAGE:725365	-4.5228	-1.76382	0.389984	0.284672	0	0
	PTP4A3 || Protein tyrosine phosphatase type IVA, member 3 || 98499	IMAGE:770854	-4.51252	-3.70397	0.82082	0.098993	0	0
	MAFB || V-maf musculoaponeurotic fibrosarcoma oncogene homolog B (avian) || 316006	IMAGE:321266	-4.50375	-3.16376	0.702473	0.136784	0	0
	TIMP3 || Tissue inhibitor of metalloproteinase 3 (Sorsby fundus dystrophy, pseudoinflammatory) || 105887	IMAGE:489519	-4.49443	-2.40822	0.535823	0.193967	0	0
	FLJ31164 || Hypothetical protein FLJ31164 || 222789	IMAGE:755459	-4.49424	-1.63658	0.36415	0.331212	0	0
	CCL11 || Chemokine (C-C motif) ligand 11 || 111400	IMAGE:343736	-4.48466	-3.05712	0.681684	0.122161	0	0
	TIP120B || TBP-interacting protein || 307054	IMAGE:1670077	-4.47654	-3.80259	0.849449	0.134099	0	0
	MT1F || Metallothionein 1F (functional) || 107373	IMAGE:78353	-4.47479	-2.39411	0.535022	0.192337	0	0
	COLEC11 || Collectin sub-family member 11 || 225225	IMAGE:812187	-4.47285	-4.40498	0.984827	0.0731401	0	0
	KIAA1443 || Protein phosphatase 1, regulatory (inhibitor) subunit 3E || 225010	IMAGE:233712	-4.47037	-1.61625	0.361546	0.321448	0	0
	LOC388335 || Similar to RIKEN cDNA A730055C05 gene || 105751	IMAGE:245299	-4.46928	-2.52934	0.565941	0.17487	0	0
	FLJ10052 || Hypothetical protein FLJ10052 || 120934	IMAGE:40364	-4.46676	-2.35633	0.527526	0.210891	0	0
	BLVRB || **Biliverdin reductase B (flavin reductase (NADPH)) || 113639	IMAGE:246035	-4.46656	-4.13724	0.926269	0.0896816	0	0
	TGFBR3 || Transforming growth factor, beta receptor III (betaglycan, 300kDa) || 220131	IMAGE:269269	-4.46097	-1.97296	0.442271	0.253791	0	0
	POLR2B || Polymerase (RNA) II (DNA directed) polypeptide B, 140kDa || 222350	IMAGE:462603	-4.4555	-2.313	0.519134	0.221614	0	0
	TMOD1 || Tropomodulin 1 || 112356	IMAGE:723986	-4.44504	-1.59489	0.358802	0.325891	0	0
	DKFZP434C171 || DKFZP434C171 protein || 309829	IMAGE:701337	-4.44493	-2.11289	0.475348	0.238977	0	0
	SEL1L || Sel-1 suppressor of lin-12-like (C. elegans) || 109485	IMAGE:418093	-4.43973	-2.15722	0.48589	0.213028	0	0
	EWSR1 || Ewing sarcoma breakpoint region 1 || 113548	IMAGE:245000	-4.43875	-2.14833	0.483995	0.237398	0	0
	USP2 || Ubiquitin specific protease 2 || 226732	IMAGE:1584313	-4.42923	-2.21227	0.499469	0.191603	0	0
	SERPINA4 || **Serine (or cysteine) proteinase inhibitor, clade A (alpha-1 antiproteinase, antitrypsin), member 4 || 99370	IMAGE:248412	-4.42068	-2.11501	0.478435	0.217057	0	0
	NBEA || Neurobeachin || 226711	IMAGE:878630	-4.41234	-1.74678	0.395885	0.298803	0	0
	BSPRY || B-box and SPRY domain containing || 99686	IMAGE:238689	-4.40627	-1.54878	0.351494	0.33036	0	0
	SEPT4 || Septin 4 || 306994	IMAGE:1882697	-4.39734	-2.39204	0.543976	0.246417	0	0
	DMN || Desmuslin || 105356	IMAGE:1161564	-4.38971	-2.26247	0.515402	0.227694	0	0
	MAPK8IP1 || Mitogen-activated protein kinase 8 interacting protein 1 || 319275	IMAGE:1761751	-4.38648	-2.141	0.48809	0.225004	0	0
	ZNF655 || Zinc finger protein 655 || 227090	IMAGE:745469	-4.38334	-1.82536	0.416431	0.283772	0	0
	|| Full-length cDNA clone CS0DI042YD07 of Placenta Cot 25-normalized of Homo sapiens (human) || 108385	IMAGE:124128	-4.37179	-2.15763	0.493535	0.218041	0	0
	BACE1 || Beta-site APP-cleaving enzyme 1 || 101249	IMAGE:490377	-4.37174	-2.8184	0.644687	0.131835	0	0
	CMKOR1 || Chemokine orphan receptor 1 || 116170	IMAGE:246786	-4.371	-1.79233	0.410051	0.283851	0	0
	MAN1A2 || Mannosidase, alpha, class 1A, member 2 || 119283	IMAGE:812266	-4.36577	-1.66111	0.380486	0.330305	0	0
	CYP4V2 || Cytochrome P450, family 4, subfamily V, polypeptide 2 || 114351	IMAGE:788445	-4.36257	-1.882	0.431397	0.302454	0	0
	CG018 || Hypothetical gene CG018 || 223312	IMAGE:50569	-4.36212	-1.70419	0.390681	0.2996	0	0
	KLF11 || Kruppel-like factor 11 || 222326	IMAGE:190509	-4.36031	-2.14844	0.492726	0.212589	0	0
	PRLR || Prolactin receptor || 115343	IMAGE:321658	-4.35709	-2.129	0.488629	0.222449	0	0
	MAFB || V-maf musculoaponeurotic fibrosarcoma oncogene homolog B (avian) || 119443	IMAGE:77193	-4.35219	-2.38644	0.548332	0.218033	0	0
	CD36 || CD36 antigen (collagen type I receptor, thrombospondin receptor) || 117061	IMAGE:243816	-4.34926	-2.8819	0.662617	0.166767	0	0
	C10orf10 || Chromosome 10 open reading frame 10 || 120092	IMAGE:135811	-4.34125	-2.41566	0.556443	0.191579	0	0
	LOC200008 || Hypothetical protein LOC200008 || 222945	IMAGE:452537	-4.34009	-1.64878	0.379895	0.318821	0	0
	CART1 || **Cartilage paired-class homeoprotein 1 || 98640	IMAGE:767475	-4.33673	-1.91719	0.442081	0.270457	0	0
	KCNJ8 || Potassium inwardly-rectifying channel, subfamily J, member 8 || 111018	IMAGE:472095	-4.33413	-2.50167	0.577202	0.16237	0	0
	|| Transcribed locus || 107312	IMAGE:344010	-4.33155	-2.17483	0.502091	0.239427	0	0
	NMNAT3 || Nicotinamide nucleotide adenylyltransferase 3 || 314796	IMAGE:1502566	-4.32931	-2.00972	0.464212	0.281104	0	0
	|| || 315470	IMAGE:757359	-4.3288	-1.71657	0.396547	0.295676	0	0
	LDB2 || LIM domain binding 2 || 108971	IMAGE:214858	-4.32748	-3.09187	0.714475	0.177225	0	0
	|| Similar to Zinc-alpha-2-glycoprotein precursor (Zn-alpha-2-glycoprotein) (Zn-alpha-2-GP) || 221070	IMAGE:454317	-4.31564	-4.18811	0.970449	0.0927189	0	0
	MCOLN3 || Mucolipin 3 || 315026	IMAGE:1683016	-4.31479	-2.184	0.506166	0.210612	0	0
	SERP1 || Stress-associated endoplasmic reticulum protein 1 || 223458	IMAGE:302955	-4.31064	-1.84711	0.4285	0.270149	0	0
	MAP1A || Microtubule-associated protein 1A || 221528	IMAGE:1499940	-4.30985	-1.85078	0.42943	0.293123	0	0
	GOLGIN-67 || Golgin-67 || 118277	IMAGE:2238788	-4.30587	-2.1676	0.503407	0.219649	0	0
	HEYL || Hairy/enhancer-of-split related with YRPW motif-like || 108244	IMAGE:132307	-4.30363	-2.6333	0.611879	0.136143	0	0
	|| CDNA FLJ11723 fis, clone HEMBA1005314 || 108544	IMAGE:111264	-4.29649	-1.8725	0.435821	0.273541	0	0
	VCAM1 || Vascular cell adhesion molecule 1 || 108899	IMAGE:44477	-4.29368	-4.46465	1.03982	0.0714296	0	0
	PLCL2 || Phospholipase C-like 2 || 222856	IMAGE:455227	-4.27166	-1.67328	0.391716	0.29861	0	0
	BCHE || Butyrylcholinesterase || 107627	IMAGE:1461664	-4.27114	-1.96178	0.45931	0.239208	0	0
	|| Homo sapiens, clone IMAGE:5221276, mRNA, partial cds || 309109	IMAGE:1620396	-4.27032	-2.20465	0.516273	0.207733	0	0
	NRBP || **Nuclear receptor binding protein || 106535	IMAGE:346944	-4.26847	-2.20256	0.516006	0.206862	0	0
	LOC161247 || Similar to CG10671-like || 220345	IMAGE:611510	-4.26041	-1.84422	0.432875	0.269166	0	0
	GAS1 || Growth arrest-specific 1 || 115019	IMAGE:365826	-4.23045	-2.9644	0.700728	0.185097	0	0
	GGTL3 || Gamma-glutamyltransferase-like 3 || 107449	IMAGE:126522	-4.22822	-1.59678	0.377648	0.327648	0	0
	|| || 316464	IMAGE:878683	-4.22359	-1.92622	0.456062	0.27466	0	0
	DPT || Dermatopontin || 224080	IMAGE:745525	-4.22246	-2.94422	0.697276	0.121047	0	0
	LEPREL2 || Leprecan-like 2 || 310171	IMAGE:1734754	-4.2202	-2.11487	0.50113	0.267602	0	0
	MST1 || Macrophage stimulating 1 (hepatocyte growth factor-like) || 106851	IMAGE:71432	-4.22002	-2.49978	0.592362	0.152075	0	0
	REG1B || Regenerating islet-derived 1 beta (pancreatic stone protein, pancreatic thread protein) || 109598	IMAGE:1412300	-4.21669	-5.28044	1.25227	0.0125677	0	0
	ART3 || ADP-ribosyltransferase 3 || 114892	IMAGE:1468263	-4.21436	-2.57167	0.610215	0.154813	0	0
	|| || 222401	IMAGE:452660	-4.21433	-2.01729	0.478674	0.232925	0	0
	|| || 99622	IMAGE:136431	-4.21324	-2.09578	0.497426	0.224937	0	0
	KCNH2 || Potassium voltage-gated channel, subfamily H (eag-related), member 2 || 117992	IMAGE:770012	-4.19998	-2.37184	0.564727	0.235401	0	0
	CDO1 || Cysteine dioxygenase, type I || 110161	IMAGE:823562	-4.19412	-3.18633	0.759712	0.148156	0	0
	|| || 114871	IMAGE:898133	-4.19185	-2.49747	0.59579	0.169823	0	0
	COL6A1 || Collagen, type VI, alpha 1 || 119506	IMAGE:263716	-4.18567	-2.06533	0.49343	0.252114	0	0
	C10orf10 || Chromosome 10 open reading frame 10 || 105665	IMAGE:245774	-4.18506	-2.84978	0.680941	0.132392	0	0
	PEMT || Phosphatidylethanolamine N-methyltransferase || 99606	IMAGE:197727	-4.18384	-1.57667	0.376847	0.323881	0	0
	TMEM37 || Transmembrane protein 37 || 113924	IMAGE:304854	-4.17009	-2.22678	0.533988	0.22101	0	0
	GUCY1A3 || Guanylate cyclase 1, soluble, alpha 3 || 116154	IMAGE:160485	-4.1623	-2.45811	0.590565	0.244182	0	0
	ABAT || 4-aminobutyrate aminotransferase || 315658	IMAGE:1855054	-4.15675	-1.60422	0.385931	0.3242	0	0
	SERPINA3 || Serine (or cysteine) proteinase inhibitor, clade A (alpha-1 antiproteinase, antitrypsin), member 3 || 117877	IMAGE:109316	-4.15472	-3.29556	0.793207	0.0694413	0	0
	XBP1 || X-box binding protein 1 || 116899	IMAGE:417867	-4.14965	-2.19578	0.529147	0.230414	0	0
	KIAA0657 || KIAA0657 protein || 113849	IMAGE:770082	-4.12545	-1.6491	0.399738	0.308849	0	0
	RAI2 || Retinoic acid induced 2 || 117547	IMAGE:501868	-4.12436	-2.16301	0.524446	0.247859	0	0
	DERL3 || Der1-like domain family, member 3 || 225685	IMAGE:379403	-4.12285	-3.0473	0.739125	0.171809	0	0
	GSTA4 || Glutathione S-transferase A4 || 112412	IMAGE:504791	-4.11238	-2.24467	0.545831	0.210216	0	0
	DPT || Dermatopontin || 99237	IMAGE:153505	-4.09846	-2.13111	0.519979	0.238534	0	0
	VPS35 || Vacuolar protein sorting 35 (yeast) || 317506	IMAGE:1738208	-4.09642	-2.73511	0.667684	0.184415	0	0
	TIFA || TRAF-interacting protein with a forkhead-associated domain || 225370	IMAGE:1435577	-4.09528	-2.00978	0.490755	0.261313	0	0
	HTPAP || HTPAP protein || 102950	IMAGE:74223	-4.08732	-2.01367	0.492662	0.224654	0	0
	HTPAP || HTPAP protein || 120451	IMAGE:788655	-4.08073	-1.63367	0.400336	0.31607	0	0
	HERPUD1 || Homocysteine-inducible, endoplasmic reticulum stress-inducible, ubiquitin-like domain member 1 || 311105	IMAGE:1533695	-4.0766	-1.80633	0.443098	0.293633	0	0
	HSPC182 || HSPC182 protein || 220244	IMAGE:1580091	-4.07633	-1.86102	0.456543	0.26652	0	0
	ARHI || DIRAS family, GTP-binding RAS-like 3 || 101148	IMAGE:345680	-4.06855	-2.90311	0.71355	0.15815	0	0
	KCTD15 || Potassium channel tetramerisation domain containing 15 || 227116	IMAGE:266019	-4.06829	-1.69478	0.416582	0.331874	0	0
	KLF11 || Kruppel-like factor 11 || 221996	IMAGE:1416029	-4.06792	-1.72174	0.423249	0.307318	0	0
	DNAJC12 || DnaJ (Hsp40) homolog, subfamily C, member 12 || 107349	IMAGE:120138	-4.06178	-1.86315	0.458702	0.301838	0	0
	|| || 108340	IMAGE:41888	-4.06004	-2.42017	0.596095	0.214731	0	0
	TU3A || TU3A protein || 310358	IMAGE:1571913	-4.05077	-3.14034	0.775244	0.181048	0	0
	EDNRA || Endothelin receptor type A || 111691	IMAGE:788285	-4.04914	-1.95044	0.481694	0.276368	0	0
	ATP2A3 || ATPase, Ca++ transporting, ubiquitous || 310591	IMAGE:1435103	-4.04524	-2.032	0.502318	0.282159	0	0
	QTRT1 || Queuine tRNA-ribosyltransferase 1 (tRNA-guanine transglycosylase) || 221864	1292521	-4.04265	-1.79333	0.443603	0.274885	0	0
	|| **Homo sapiens, clone IMAGE:4830306, mRNA || 222688	IMAGE:173043	-4.04015	-2.91756	0.722141	0.102795	0	0
	|| Transcribed locus || 317891	IMAGE:1686177	-4.03898	-1.86511	0.461778	0.262827	0	0
	C1orf21 || Chromosome 1 open reading frame 21 || 114578	IMAGE:293569	-4.02919	-2.07965	0.516147	0.259687	0	0
	TIMP3 || Tissue inhibitor of metalloproteinase 3 (Sorsby fundus dystrophy, pseudoinflammatory) || 104656	IMAGE:774181	-4.02518	-2.437	0.605439	0.16417	0	0
	KLK3 || Kallikrein 3, (prostate specific antigen) || 121351	IMAGE:914588	-4.02329	-2.83944	0.705752	0.112079	0	0
	CDH22 || Cadherin-like 22 || 315768	IMAGE:2273326	-4.01885	-1.66189	0.413524	0.312494	0	0
	ATF7IP2 || Activating transcription factor 7 interacting protein 2 || 220590	IMAGE:824260	-4.00594	-2.26532	0.56549	0.224075	0	0
	SH3YL1 || SH3 domain containing, Ysc84-like 1 (S. cerevisiae) || 99796	IMAGE:108422	-3.99924	-1.82333	0.45592	0.282568	0	0
	HEYL || Hairy/enhancer-of-split related with YRPW motif-like || 225143	IMAGE:1579647	-3.9981	-1.80344	0.451076	0.269344	0	0
	C14orf132 || Chromosome 14 open reading frame 132 || 107611	IMAGE:51344	-3.9925	-3.21615	0.805549	0.205958	0	0
	PBX1 || Pre-B-cell leukemia transcription factor 1 || 101131	IMAGE:297604	-3.98425	-2.17356	0.545537	0.252936	0	0
	PFKFB2 || 6-phosphofructo-2-kinase/fructose-2,6-biphosphatase 2 || 119747	IMAGE:53158	-3.97437	-1.99306	0.501479	0.248405	0	0
	MGC52110 || Hypothetical protein MGC52110 || 116327	IMAGE:1074007	-3.97146	-1.69843	0.427657	0.307217	0	0
	SCG2 || Secretogranin II (chromogranin C) || 105163	IMAGE:174627	-3.9674	-2.60533	0.656685	0.167167	0	0
	STX7 || Syntaxin 7 || 110224	IMAGE:83666	-3.96596	-1.75411	0.442291	0.277204	0	0
	GCAT || Glycine C-acetyltransferase (2-amino-3-ketobutyrate coenzyme A ligase) || 225450	IMAGE:878850	-3.96087	-2.02822	0.512065	0.225868	0	0
	IGFBP5 || Insulin-like growth factor binding protein 5 || 101312	IMAGE:45542	-3.96032	-2.22356	0.561459	0.254668	0	0
	GPC4 || Glypican 4 || 117570	IMAGE:358217	-3.96	-1.87778	0.474186	0.289569	0	0
	SERPING1 || Serine (or cysteine) proteinase inhibitor, clade G (C1 inhibitor), member 1, (angioedema, hereditary) || 98506	IMAGE:381066	-3.95688	-2.58378	0.652984	0.152875	0	0
	|| Transcribed locus || 309785	IMAGE:1605562	-3.95463	-1.53224	0.387455	0.333049	0	0
	DMD || Dystrophin (muscular dystrophy, Duchenne and Becker types) || 112511	IMAGE:796197	-3.95284	-1.76767	0.447189	0.291412	0	0
	ITIH4 || Inter-alpha (globulin) inhibitor H4 (plasma Kallikrein-sensitive glycoprotein) || 110356	IMAGE:296123	-3.95103	-3.33156	0.843211	0.0677556	0	0
	|| || 226174	IMAGE:1558855	-3.94339	-1.5779	0.400139	0.332706	0	0
	TU3A || TU3A protein || 307379	IMAGE:1947911	-3.94305	-2.179	0.552618	0.221068	0	0
	FLJ12895 || Hypothetical protein FLJ12895 || 220181	IMAGE:23271	-3.93927	-1.77471	0.450519	0.27269	0	0
	MGC11242 || Hypothetical protein MGC11242 || 107267	IMAGE:429433	-3.93723	-1.89624	0.481618	0.287842	0	0
	|| || 111988	IMAGE:744417	-3.93336	-2.01533	0.51237	0.230143	0	0
	GUCY1A3 || Guanylate cyclase 1, soluble, alpha 3 || 106115	IMAGE:51749	-3.93327	-1.69083	0.429877	0.302896	0	0
	KLK5 || Kallikrein 5 || 116162	IMAGE:344588	-3.93264	-2.36156	0.600501	0.226896	0	0
	PRDX4 || Peroxiredoxin 4 || 114266	IMAGE:795543	-3.9318	-2.00656	0.51034	0.229627	0	0
	LGALS2 || Lectin, galactoside-binding, soluble, 2 (galectin 2) || 114352	IMAGE:1472743	-3.92531	-3.43656	0.875486	0.0633281	0	0
	WNT11 || Wingless-type MMTV integration site family, member 11 || 223376	IMAGE:235986	-3.9165	-2.11956	0.541186	0.264537	0	0
	ACY3 || Aspartoacylase (aminocyclase) 3 || 109068	IMAGE:129128	-3.90658	-2.0594	0.527162	0.221567	0	0
	DPP6 || Dipeptidylpeptidase 6 || 109906	IMAGE:361688	-3.90584	-1.74028	0.445557	0.285776	0	0
	APLP1 || Amyloid beta (A4) precursor-like protein 1 || 104238	IMAGE:289645	-3.90235	-2.41611	0.619142	0.193861	0	0
	MTAC2D1 || Membrane targeting (tandem) C2 domain containing 1 || 115007	IMAGE:339179	-3.90212	-2.23767	0.573449	0.197669	0	0
	LOC200008 || Hypothetical protein LOC200008 || 116245	IMAGE:121012	-3.90192	-1.63581	0.419231	0.329347	0	0
	DAB2 || Disabled homolog 2, mitogen-responsive phosphoprotein (Drosophila) || 99320	IMAGE:1588809	-3.89576	-1.69667	0.435516	0.329179	0	0
	RAB24 || RAB24, member RAS oncogene family || 104548	IMAGE:115111	-3.89274	-1.80567	0.463855	0.266417	0	0
	LPL || Lipoprotein lipase || 120065	IMAGE:868169	-3.89231	-2.30696	0.592696	0.192332	0	0
	CLU || **Clusterin (complement lysis inhibitor, SP-40,40, sulfated glycoprotein 2, testosterone-repressed prostate message 2, apolipoprotein J) || 115765	IMAGE:589362	-3.88841	-1.79011	0.460371	0.272425	0	0
	DKFZP434C171 || DKFZP434C171 protein || 99842	IMAGE:152293	-3.88591	-1.85457	0.477256	0.263617	0	0
	FLJ23033 || Hypothetical protein FLJ23033 || 226565	IMAGE:745090	-3.88234	-1.66714	0.429418	0.299476	0	0
	SMOC2 || SPARC related modular calcium binding 2 || 223266	IMAGE:1572196	-3.87078	-1.93833	0.500761	0.273082	0	0
	INSR || Insulin receptor || 118412	IMAGE:427812	-3.86514	-2.16822	0.560969	0.216204	0	0
	TEAD4 || TEA domain family member 4 || 108327	IMAGE:346696	-3.86105	-1.60167	0.414827	0.315678	0	0
	C20orf19 || Chromosome 20 open reading frame 19 || 309035	IMAGE:754417	-3.85759	-2.02878	0.525918	0.225268	0	0
	|| CDNA FLJ41270 fis, clone BRAMY2036387 || 104494	IMAGE:153617	-3.85585	-2.44078	0.633007	0.160262	0	0
	CYP39A1 || Cytochrome P450, family 39, subfamily A, polypeptide 1 || 114440	IMAGE:294259	-3.85499	-1.75776	0.455969	0.284172	0	0
	|| Hypothetical gene supported by AL713796 || 224344	IMAGE:768020	-3.851	-1.95803	0.508447	0.244731	0	0
	|| || 106311	IMAGE:322175	-3.84556	-2.15444	0.560242	0.209729	0	0
	|| || 225715	IMAGE:462412	-3.84522	-2.08922	0.543329	0.272753	0	0
	SNX26 || Sorting nexin 26 || 308122	IMAGE:2017661	-3.8313	-1.72967	0.451457	0.296106	0	0
	KIAA1036 || KIAA1036 || 111447	IMAGE:417084	-3.83011	-1.79928	0.469772	0.292774	0	0
	|| LOC440202 || 319629	IMAGE:1912951	-3.82508	-1.69044	0.441937	0.296152	0	0
	|| || 102622	IMAGE:1636463	-3.82406	-1.79589	0.469629	0.275885	0	0
	UNC5CL || Unc-5 homolog C (C. elegans)-like || 111576	IMAGE:1088039	-3.82177	-1.67578	0.438482	0.295626	0	0
	MTAC2D1 || Membrane targeting (tandem) C2 domain containing 1 || 102486	IMAGE:544959	-3.81655	-2.05433	0.53827	0.231284	0	0
	MAN1C1 || Mannosidase, alpha, class 1C, member 1 || 118014	IMAGE:770785	-3.79237	-2.59309	0.683765	0.258694	0	0
	|| || 222604	IMAGE:1533611	-3.79059	-2.19352	0.578676	0.192188	0	0
	FGF7 || Fibroblast growth factor 7 (keratinocyte growth factor) || 101547	IMAGE:365515	-3.78952	-1.66721	0.439952	0.304118	0	0
	SRPRB || Signal recognition particle receptor, B subunit || 315278	IMAGE:1706356	-3.78789	-1.595	0.42108	0.32205	0	0
	ABCA8 || ATP-binding cassette, sub-family A (ABC1), member 8 || 223616	IMAGE:743773	-3.77742	-2.24163	0.593428	0.218922	0	0
	JAM3 || Junctional adhesion molecule 3 || 220192	IMAGE:1554167	-3.77111	-2.93078	0.777165	0.218787	0	0
	HSPC047 || HSPC047 protein || 222793	IMAGE:1601845	-3.7698	-1.80156	0.477892	0.314111	0	0
	DNAJB9 || DnaJ (Hsp40) homolog, subfamily B, member 9 || 120729	IMAGE:773278	-3.7691	-1.769	0.469343	0.286387	0	0
	BDKRB2 || Bradykinin receptor B2 || 117192	IMAGE:665674	-3.76275	-1.60358	0.426171	0.321455	0	0
	PBX1 || Pre-B-cell leukemia transcription factor 1 || 307287	IMAGE:2018074	-3.76259	-1.74052	0.462586	0.297182	0	0
	SLC35E1 || Solute carrier family 35, member E1 || 103817	IMAGE:984044	-3.7594	-1.74211	0.463402	0.301935	0	0
	HLF || Hepatic leukemia factor || 313394	IMAGE:41684	-3.7479	-3.70022	0.987278	0.18043	0	0
	ZNF395 || Zinc finger protein 395 || 119537	IMAGE:272942	-3.74762	-2.00833	0.535895	0.263445	0	0
	DNALI1 || Dynein, axonemal, light intermediate polypeptide 1 || 115462	IMAGE:782688	-3.74646	-1.95276	0.521229	0.28681	0	0
	SYNGR1 || Synaptogyrin 1 || 104738	IMAGE:429466	-3.7383	-2.35493	0.629947	0.214888	0	0
	GLIS3 || GLIS family zinc finger 3 || 102960	IMAGE:212347	-3.73527	-2.19789	0.588414	0.217856	0	0
	ROBO4 || Roundabout homolog 4, magic roundabout (Drosophila) || 118644	IMAGE:590120	-3.73511	-1.57248	0.421	0.326462	0	0
	MEST || Mesoderm specific transcript homolog (mouse) || 101074	IMAGE:898219	-3.7208	-1.59256	0.428014	0.330359	0	0
	|| Transcribed locus, strongly similar to XP_522522.1 similar to Huntingtin interacting protein E; huntingtin interactor protein E [Pan troglodytes] || 308182	IMAGE:1682875	-3.71857	-1.64815	0.443222	0.307257	0	0
	MT1X || Metallothionein 1X || 111826	IMAGE:297392	-3.71467	-2.27056	0.611241	0.181127	0	0
	MMAB || Methylmalonic aciduria (cobalamin deficiency) type B || 226241	IMAGE:450050	-3.71428	-1.56056	0.42015	0.331814	0	0
	KIAA1409 || KIAA1409 || 104165	IMAGE:884338	-3.69982	-1.91364	0.517226	0.27278	0	0
	GALK1 || Galactokinase 1 || 311047	IMAGE:1636836	-3.69512	-1.85089	0.500902	0.254826	0	0
	BZRAP1 || Benzodiazapine receptor (peripheral) associated protein 1 || 307361	IMAGE:1930780	-3.69483	-2.13344	0.577414	0.254066	0	0
	PEG3 || Paternally expressed 3 || 102474	IMAGE:796398	-3.68848	-1.91422	0.518973	0.287088	0	0
	ASRGL1 || Asparaginase like 1 || 226414	IMAGE:1558655	-3.67961	-1.86946	0.508059	0.285189	0	0
	BACE1 || Beta-site APP-cleaving enzyme 1 || 224754	IMAGE:78680	-3.67937	-2.58756	0.703262	0.11786	0	0
	SH2D3C || SH2 domain containing 3C || 224000	IMAGE:746083	-3.67638	-2.38188	0.647888	0.232304	0	0
	NOTCH2NL || **Notch homolog 2 (Drosophila) N-terminal like || 227113	IMAGE:129883	-3.67569	-2.07933	0.565699	0.220684	0	0
	AMT || Aminomethyltransferase (glycine cleavage system protein T) || 118158	IMAGE:248631	-3.6734	-1.5858	0.431698	0.314557	0	0
	PTPRN2 || Protein tyrosine phosphatase, receptor type, N polypeptide 2 || 104107	IMAGE:812968	-3.66658	-2.11167	0.575922	0.27963	0	0
	PFAAP5 || Phosphonoformate immuno-associated protein 5 || 309472	IMAGE:1911526	-3.66597	-1.74	0.474636	0.271122	0	0
	HIST1H2AC || Histone 1, H2ac || 117234	IMAGE:241274	-3.66289	-1.76956	0.483104	0.272773	0	0
	ITGA7 || Integrin, alpha 7 || 108042	IMAGE:377671	-3.66192	-2.11434	0.577386	0.277988	0	0
	|| Homo sapiens, clone IMAGE:4654429, mRNA || 99965	IMAGE:51015	-3.66105	-3.59499	0.981958	0.179064	0	0
	COL3A1 || Collagen, type III, alpha 1 (Ehlers-Danlos syndrome type IV, autosomal dominant) || 108262	IMAGE:122159	-3.64603	-3.18811	0.874407	0.125162	0	0
	|| || 116985	IMAGE:34093	-3.64448	-1.72178	0.472434	0.282516	0	0
	|| || 117533	IMAGE:1700582	-3.64349	-1.69244	0.464512	0.298565	0	0
	SIDT2 || SID1 transmembrane family, member 2 || 109896	IMAGE:838285	-3.63211	-1.83711	0.505797	0.271342	0	0
	ONECUT1 || One cut domain, family member 1 || 116315	IMAGE:433307	-3.62476	-1.79329	0.494733	0.270555	0	0
	HLXB9 || Homeo box HB9 || 313655	IMAGE:2151705	-3.61915	-1.94433	0.537234	0.232915	0	0
	MKNK1 || MAP kinase interacting serine/threonine kinase 1 || 117629	IMAGE:773637	-3.61577	-1.77044	0.489645	0.287867	0	0
	GMNN || Geminin, DNA replication inhibitor || 117413	IMAGE:193883	-3.61536	-1.64267	0.454357	0.32489	0	0
	ELMO1 || Engulfment and cell motility 1 (ced-12 homolog, C. elegans) || 113815	IMAGE:51178	-3.61313	-1.9956	0.552318	0.310099	0	0
	SLC25A21 || Solute carrier family 25 (mitochondrial oxodicarboxylate carrier), member 21 || 116302	IMAGE:302004	-3.61236	-1.57178	0.435111	0.32257	0	0
	TIGA1 || TIGA1 || 113198	IMAGE:85194	-3.61014	-1.70422	0.472065	0.279612	0	0
	NID67 || Putative small membrane protein NID67 || 226698	IMAGE:324674	-3.6037	-2.04211	0.566671	0.279158	0	0.0209718
	TNA || C-type lectin domain family 3, member B || 118303	IMAGE:345553	-3.6033	-2.26206	0.627776	0.21648	0	0.0229284
	ATP8A1 || ATPase, aminophospholipid transporter (APLT), Class I, type 8A, member 1 || 241835	IMAGE:290275	-3.6032	-2.74711	0.762408	0.164514	0	0.0234032
	|| || 103261	IMAGE:359982	-3.60121	-1.95867	0.543892	0.235905	0	0.0332598
	GATA4 || GATA binding protein 4 || 101536	IMAGE:243410	-3.59867	-4.80989	1.33657	0.0877487	0	0.0457931
	|| Transcribed locus, weakly similar to XP_536818.1 similar to RIKEN cDNA 2700055K07 [Canis familiaris] || 109858	IMAGE:487327	-3.59667	-1.61333	0.448564	0.309832	0	0.055766
	DKFZp547K1113 || Hypothetical protein DKFZp547K1113 || 226746	IMAGE:248391	-3.59044	-1.96439	0.547117	0.279251	0	0.0868681
	CAMK1D || Calcium/calmodulin-dependent protein kinase ID || 114110	IMAGE:322857	-3.58365	-2.11181	0.589288	0.289118	0	0.121084
	|| LOC440669 || 313384	IMAGE:1914562	-3.58086	-1.611	0.449892	0.32587	0	0.13529
	|| Homo sapiens, clone IMAGE:5276804, mRNA || 114590	IMAGE:796170	-3.57933	-1.52911	0.427205	0.328284	0	0.143037
	FLJ31340 || Hypothetical protein FLJ31340 || 224845	IMAGE:845380	-3.5747	-1.90344	0.532477	0.249758	0	0.166759
	LOC126075 || Hypothetical protein LOC126075 || 307099	IMAGE:1536231	-3.57241	-1.73258	0.484988	0.292418	0	0.17848
	WNT11 || Wingless-type MMTV integration site family, member 11 || 109387	IMAGE:1742419	-3.57072	-2.25629	0.631886	0.265294	0	0.187208
	MAT2A || **Methionine adenosyltransferase II, alpha || 100948	IMAGE:79502	-3.56777	-1.54422	0.432826	0.324831	0	0.202481
	|| || 308236	IMAGE:126415	-3.5567	-1.99882	0.561987	0.24153	0	0.260266
	TncRNA || Trophoblast-derived noncoding RNA || 307567	IMAGE:241043	-3.55275	-2.11233	0.594563	0.211619	0	0.281105
	|| || 113293	IMAGE:783697	-3.55217	-1.99544	0.561754	0.228453	0	0.284166
	|| Transcribed locus, weakly similar to XP_347139.1 LOC363435 [Rattus norvegicus] || 312021	IMAGE:1893899	-3.53649	-1.97478	0.5584	0.221799	0	0.368057
	HBS1L || HBS1-like (S. cerevisiae) || 311748	IMAGE:1685029	-3.52653	-1.59078	0.451089	0.310165	0	0.422343
	CA12 || Carbonic anhydrase XII || 108855	IMAGE:594633	-3.52519	-2.23989	0.635396	0.179103	0	0.429703
	|| Full length insert cDNA clone ZD42A08 || 119786	IMAGE:357037	-3.52272	-2.0588	0.584435	0.29058	0	0.443242
	|| CDNA FLJ36181 fis, clone TESTI2026794 || 309478	IMAGE:1584449	-3.52232	-1.8946	0.537883	0.257657	0	0.445448
	SERPINA6 || Serine (or cysteine) proteinase inhibitor, clade A (alpha-1 antiproteinase, antitrypsin), member 6 || 107223	IMAGE:240518	-3.51654	-2.77928	0.790345	0.203337	0	0.477473
	C20orf19 || Chromosome 20 open reading frame 19 || 100132	IMAGE:241003	-3.50689	-1.7489	0.498705	0.317551	0	0.53145
	C1QA || Complement component 1, q subcomponent, alpha polypeptide || 114131	IMAGE:1637203	-3.50078	-2.074	0.592439	0.245385	0	0.565973
	DKFZp434C0328 || **Hypothetical protein DKFZp434C0328 || 105747	IMAGE:135106	-3.4951	-2.19289	0.627417	0.195965	0	0.598339
	PPP1R14A || Protein phosphatase 1, regulatory (inhibitor) subunit 14A || 110702	IMAGE:809611	-3.48023	-1.66885	0.479521	0.319229	0	0.684218
	INSIG1 || Insulin induced gene 1 || 100137	IMAGE:207288	-3.4758	-2.024	0.582311	0.228732	0	0.710137
	FABP4 || Fatty acid binding protein 4, adipocyte || 106685	IMAGE:307660	-3.47206	-2.10113	0.605154	0.196726	0	0.732127
	FLJ12604 || Ventricular zone expressed PH domain homolog 1 (zebrafish) || 319986	IMAGE:853908	-3.47184	-1.70774	0.491883	0.322616	0	0.733475
	HSPC157 || HSPC157 protein || 116760	IMAGE:264162	-3.46775	-2.77111	0.799108	0.141197	0	0.757615
	TENC1 || Tensin like C1 domain containing phosphatase || 110751	IMAGE:813603	-3.46635	-1.747	0.503989	0.324871	0	0.765964
	EPB41L4B || Erythrocyte membrane protein band 4.1 like 4B || 98905	IMAGE:210697	-3.46293	-2.08378	0.601739	0.196464	0	0.786333
	HUNK || Hormonally upregulated Neu-associated kinase || 120043	IMAGE:79240	-3.45761	-1.95244	0.56468	0.28563	0	0.818147
	RPS9 || **Ribosomal protein S9 || 117069	IMAGE:1862539	-3.45688	-1.57956	0.45693	0.327242	0	0.822511
	INSR || Insulin receptor || 106497	IMAGE:1521059	-3.45683	-2.00856	0.58104	0.262216	0	0.822852
	TAF4B || TAF4b RNA polymerase II, TATA box binding protein (TBP)-associated factor, 105kDa || 117795	IMAGE:838408	-3.45292	-1.74572	0.505579	0.307731	0	0.846437
	CDKN1C || Cyclin-dependent kinase inhibitor 1C (p57, Kip2) || 99956	IMAGE:147744	-3.43858	-3.3446	0.97267	0.18346	0	0.9339
	PHF17 || PHD finger protein 17 || 221890	IMAGE:825813	-3.43299	-1.66878	0.486101	0.328913	0	0.968428
	DKFZP586A0522 || DKFZP586A0522 protein || 103560	IMAGE:294397	-3.42358	-2.02469	0.591397	0.261434	0	1.02712
	|| Transcribed locus || 222235	IMAGE:745470	-3.42091	-1.66562	0.486895	0.291217	0	1.0439
	KLK13 || Kallikrein 13 || 116603	IMAGE:743113	-3.41766	-1.92165	0.562272	0.235274	0	1.06442
	C1orf24 || Chromosome 1 open reading frame 24 || 226503	IMAGE:1500241	-3.41016	-2.08293	0.610799	0.266566	0	1.11202
	|| Transcribed locus || 108524	IMAGE:418356	-3.40076	-1.67965	0.493903	0.321498	0	1.17236
	C1QR1 || Complement component 1, q subcomponent, receptor 1 || 99029	IMAGE:35503	-3.39881	-2.81633	0.828621	0.162598	0	1.18499
	PPY || Pancreatic polypeptide || 112196	IMAGE:1412398	-3.39866	-3.12354	0.919052	0.0697347	0	1.18598
	CD34 || CD34 antigen || 102058	IMAGE:770858	-3.39505	-2.41041	0.709977	0.173698	0	1.20942
	PDE3A || Phosphodiesterase 3A, cGMP-inhibited || 108922	IMAGE:133864	-3.39376	-1.95633	0.57645	0.288154	0	1.21779
	TGDS || TDP-glucose 4,6-dehydratase || 119199	IMAGE:1567660	-3.38904	-2.05133	0.605284	0.208188	0	1.24861
	KRTCAP2 || **Keratinocyte associated protein 2 || 112257	IMAGE:742904	-3.38564	-1.60044	0.472715	0.308199	0	1.27092
	ANGPTL2 || Angiopoietin-like 2 || 224656	IMAGE:453195	-3.37937	-2.12417	0.628571	0.33116	0	1.31237
	MAN1A1 || Mannosidase, alpha, class 1A, member 1 || 101342	IMAGE:823688	-3.37675	-2.03312	0.602095	0.275065	0	1.32978
	GABRB3 || Gamma-aminobutyric acid (GABA) A receptor, beta 3 || 117315	IMAGE:53022	-3.37588	-2.03386	0.602467	0.311903	0	1.33553
	CD34 || CD34 antigen || 105957	IMAGE:213635	-3.37388	-1.747	0.517801	0.302378	0	1.34886
	ZNF219 || Zinc finger protein 219 || 102187	IMAGE:132848	-3.372	-2.14374	0.635747	0.217546	0	1.36144
	PLEKHB1 || Pleckstrin homology domain containing, family B (evectins) member 1 || 119998	IMAGE:731469	-3.35938	-1.9981	0.594782	0.328596	0	1.44657
	ELL2 || Elongation factor, RNA polymerase II, 2 || 222191	IMAGE:767988	-3.35678	-1.77144	0.527722	0.276172	0	1.46426
	PPP2R4 || Protein phosphatase 2A, regulatory subunit B' (PR 53) || 161402	IMAGE:37553	-3.34814	-1.58122	0.472269	0.319429	0	1.52346
	NUCB2 || Nucleobindin 2 || 105391	IMAGE:357531	-3.34669	-1.77112	0.529215	0.299644	0	1.53342
	ITGAX || Integrin, alpha X (antigen CD11C (p150), alpha polypeptide) || 109296	IMAGE:290234	-3.34461	-2.07378	0.620036	0.279574	0	1.54784
	PPY2 || Pancreatic polypeptide 2 || 119788	IMAGE:210873	-3.33661	-3.18058	0.953237	0.0658144	0	1.60346
	|| || 224259	IMAGE:461420	-3.32659	-1.96408	0.590417	0.311251	0	1.67384
	ISL1 || ISL1 transcription factor, LIM/homeodomain, (islet-1) || 104863	IMAGE:362795	-3.32413	-2.4864	0.747985	0.194709	0	1.69125
	OSBPL6 || Oxysterol binding protein-like 6 || 117834	IMAGE:121459	-3.31014	-1.82837	0.552352	0.316628	0	1.79123
	|| Similar to metallothionein isoform 2 || 110993	IMAGE:129585	-3.30693	-1.66322	0.502951	0.312479	0	1.81447
	SSR4 || Signal sequence receptor, delta (translocon-associated protein delta) || 98447	IMAGE:840821	-3.30621	-1.6641	0.503325	0.294342	0	1.81966
	TP53INP1 || Tumor protein p53 inducible nuclear protein 1 || 223961	IMAGE:814528	-3.30298	-1.69056	0.511827	0.320259	0	1.84306
	SSFA2 || Sperm specific antigen 2 || 312348	IMAGE:1898730	-3.29643	-1.8337	0.55627	0.253734	0	1.89088
	OLFM4 || Olfactomedin 4 || 311756	IMAGE:2312470	-3.29639	-4.27678	1.29741	0.0451933	0	1.8912
	ADH1B || Alcohol dehydrogenase IB (class I), beta polypeptide || 100422	IMAGE:307231	-3.29385	-2.05	0.622373	0.19952	0	1.90983
	LOC149351 || Hypothetical protein LOC149351 || 222135	IMAGE:436456	-3.29307	-1.69927	0.516013	0.317463	0	1.91552
	HPD || 4-hydroxyphenylpyruvate dioxygenase || 117461	IMAGE:430314	-3.28837	-1.64488	0.500211	0.310155	0	1.95019
	|| || 100489	IMAGE:769857	-3.28802	-1.91099	0.581198	0.285201	0	1.95281
	TRPC3 || Transient receptor potential cation channel, subfamily C, member 3 || 314259	IMAGE:2239277	-3.28466	-1.5943	0.485377	0.313855	0	1.97768
	|| || 225076	IMAGE:1434940	-3.27811	-1.62933	0.497035	0.309735	0	2.02653
	RGC32 || Response gene to complement 32 || 223989	IMAGE:487287	-3.27731	-2.03567	0.62114	0.321011	0	2.03251
	|| Transcribed locus, weakly similar to XP_517454.1 similar to hypothetical protein MGC45438 [Pan troglodytes] || 101758	IMAGE:796531	-3.2768	-2.78511	0.849949	0.153137	0	2.03632
	C6orf204 || **Chromosome 6 open reading frame 204 || 103278	IMAGE:301400	-3.27572	-1.89022	0.577038	0.27563	0	2.04439
	INSR || Insulin receptor || 120639	IMAGE:70749	-3.27336	-1.73067	0.528713	0.289007	0	2.06216
	|| || 101339	IMAGE:151775	-3.26928	-1.56851	0.479774	0.317607	0	2.09294
	SYT11 || Synaptotagmin XI || 115709	IMAGE:780937	-3.25978	-2.22167	0.68154	0.271311	0	2.16516
	HTATSF1 || HIV TAT specific factor 1 || 120487	IMAGE:1434948	-3.25942	-1.77178	0.543587	0.258451	0	2.1679
	DDR2 || Discoidin domain receptor family, member 2 || 116248	IMAGE:668442	-3.2569	-2.05956	0.632367	0.311863	0	2.18719
	D4S234E || DNA segment on chromosome 4 (unique) 234 expressed sequence || 107172	IMAGE:1325605	-3.24943	-1.60544	0.49407	0.311919	0	2.24471
	MGC50844 || Hypothetical protein MGC50844 || 225703	IMAGE:281597	-3.24556	-1.70917	0.526618	0.288565	0	2.27473
	|| || 320079	IMAGE:1893920	-3.24546	-1.64246	0.506079	0.304513	0	2.27543
	ITM2A || Integral membrane protein 2A || 118803	IMAGE:245277	-3.23414	-1.69744	0.524852	0.296196	0	2.36398
	LOC255743 || Hypothetical protein LOC255743 || 111749	IMAGE:470105	-3.23347	-2.24222	0.693441	0.189458	0	2.36922
	GCAT || Glycine C-acetyltransferase (2-amino-3-ketobutyrate coenzyme A ligase) || 109212	IMAGE:307094	-3.23167	-1.81963	0.563063	0.250498	0	2.38341
	MAPK8IP1 || Mitogen-activated protein kinase 8 interacting protein 1 || 225314	IMAGE:167267	-3.23017	-1.70587	0.528106	0.315004	0	2.39527
	SPARC || Secreted protein, acidic, cysteine-rich (osteonectin) || 112917	IMAGE:293917	-3.22822	-1.93511	0.599436	0.261692	0	2.41069
	RGS5 || Regulator of G-protein signalling 5 || 118448	IMAGE:271038	-3.22471	-1.95522	0.606325	0.26664	0	2.43856
	|| MRNA; cDNA DKFZp761L1121 (from clone DKFZp761L1121) || 220283	IMAGE:969765	-3.2208	-1.53873	0.477747	0.313248	0	2.46969
	|| || 113570	IMAGE:868813	-3.21598	-1.67133	0.519697	0.324838	0	2.50834
	COL6A3 || Collagen, type VI, alpha 3 || 105228	IMAGE:138991	-3.20714	-2.15322	0.671383	0.238654	0	2.57963
	C10orf10 || Chromosome 10 open reading frame 10 || 226077	IMAGE:137554	-3.20016	-2.33809	0.730617	0.150158	0	2.6365
	|| Similar to hypothetical protein A230046P18; cDNA sequence BC055759 || 119362	IMAGE:782537	-3.19815	-1.82879	0.571828	0.286135	0	2.6529
	MEIS1 || Meis1, myeloid ecotropic viral integration site 1 homolog (mouse) || 310608	IMAGE:307506	-3.19276	-1.75589	0.549959	0.324738	0	2.69721
	RNP || RNA-binding region (RNP1, RRM) containing 3 || 100382	IMAGE:811612	-3.19222	-1.65913	0.519743	0.330068	0	2.70167
	|| Transcribed locus || 109412	IMAGE:138974	-3.19198	-1.76959	0.554388	0.26137	0	2.70369
	|| || 306868	IMAGE:1681719	-3.18623	-1.56928	0.492519	0.330924	0	2.75121
	|| CDNA FLJ41321 fis, clone BRAMY2045299 || 105584	IMAGE:262313	-3.17922	-1.88414	0.592642	0.321176	0	2.80965
	KCNA3 || Potassium voltage-gated channel, shaker-related subfamily, member 3 || 307548	IMAGE:1666549	-3.17742	-1.91898	0.603941	0.313078	0	2.82468
	PHYHIPL || Family with sequence similarity 13, member C1 || 220115	IMAGE:743902	-3.17504	-2.16141	0.68075	0.243839	0	2.84463
	GNG7 || Guanine nucleotide binding protein (G protein), gamma 7 || 224448	IMAGE:190059	-3.169	-2.39569	0.755978	0.27862	0	2.89559
	|| || 100095	IMAGE:428782	-3.16805	-1.92911	0.608927	0.306669	0	2.90362
	S100B || S100 calcium binding protein, beta (neural) || 108213	IMAGE:759948	-3.16437	-1.812	0.572627	0.291153	0	2.93486
	CLDN10 || Claudin 10 || 112736	IMAGE:810761	-3.16385	-1.97833	0.625294	0.294804	0	2.93927
	NGFR || Nerve growth factor receptor (TNFR superfamily, member 16) || 118434	IMAGE:154790	-3.15653	-2.8566	0.904981	0.244866	0	3.00175
	|| TGF-betaIIR beta || 315299	IMAGE:1560599	-3.15408	-1.93454	0.613345	0.32534	0	3.02276
	CCND2 || Cyclin D2 || 109843	IMAGE:249688	-3.15345	-2.40133	0.761493	0.273178	0	3.02816
	PLEKHB1 || Pleckstrin homology domain containing, family B (evectins) member 1 || 224055	IMAGE:447416	-3.15302	-3.33196	1.05675	0.189586	0	3.03194
	MI-ER1 || **Mesoderm induction early response 1 || 104529	IMAGE:23136	-3.15223	-1.614	0.512019	0.311338	0	3.03872
	13CDNA73 || Hypothetical protein CG003 || 103116	IMAGE:46284	-3.15161	-1.95	0.618731	0.243903	0	3.04403
	|| Transcribed locus || 99270	IMAGE:1593585	-3.14208	-1.77211	0.563994	0.322799	0	3.12662
	MEG3 || Maternally expressed 3 || 309868	IMAGE:768936	-3.13318	-2.81233	0.897596	0.1269	0	3.20441
	|| Transcribed locus || 316013	IMAGE:1917422	-3.13131	-1.90056	0.606953	0.251169	0	3.22093
	RGPR || Regucalcin gene promotor region related protein || 224377	IMAGE:453063	-3.12695	-2.01322	0.643829	0.21985	0	3.25937
	AR || Androgen receptor (dihydrotestosterone receptor; testicular feminization; spinal and bulbar muscular atrophy; Kennedy disease) || 228995	IMAGE:2250839	-3.12339	-2.2516	0.720881	0.32826	0	3.29091
	|| || 314852	IMAGE:1556092	-3.12244	-1.93444	0.61953	0.238414	0	3.29941
	CHAD || Chondroadherin || 224553	IMAGE:1507713	-3.12173	-2.52578	0.809094	0.132888	0	3.30567
	|| || 107812	IMAGE:913833	-3.11979	-1.77703	0.569598	0.272448	0	3.32296
	EPHX1 || Hypothetical gene supported by AK124699 || 306956	IMAGE:1601979	-3.11384	-1.71189	0.549767	0.290808	0	3.37617
	SEMA6D || **Sema domain, transmembrane domain (TM), and cytoplasmic domain, (semaphorin) 6D || 108457	IMAGE:564514	-3.11216	-1.84667	0.593371	0.236188	0	3.39128
	LRRN6D || RAR-related orphan receptor C || 103323	IMAGE:1568245	-3.11163	-1.63337	0.524924	0.286736	0	3.39609
	SLC33A1 || Solute carrier family 33 (acetyl-CoA transporter), member 1 || 317866	IMAGE:1917809	-3.10917	-1.61294	0.518767	0.28641	0	3.41819
	|| Hypothetical gene supported by AK024177 || 318133	IMAGE:1950130	-3.10312	-1.57256	0.506766	0.308546	0	3.47295
	|| || 108490	IMAGE:1869533	-3.10237	-1.48133	0.477485	0.32928	0	3.47975
	H19 || H19, imprinted maternally expressed untranslated mRNA || 110268	IMAGE:428721	-3.08809	-1.77122	0.573565	0.262832	0	3.61032
	LOC253039 || Hypothetical protein LOC253039 || 225606	IMAGE:1033388	-3.08304	-1.47889	0.479686	0.323496	0	3.65706
	SLC3A1 || Solute carrier family 3 (cystine, dibasic and neutral amino acid transporters, activator of cystine, dibasic and neutral amino acid transport), member 1 || 106265	IMAGE:53092	-3.08289	-1.65298	0.53618	0.286965	0	3.65843
	THBS4 || Thrombospondin 4 || 119951	IMAGE:758266	-3.07614	-2.16848	0.704936	0.201977	0	3.72114
	ANXA13 || Annexin A13 || 119463	IMAGE:1468461	-3.05953	-2.31978	0.758213	0.149466	0	3.87745
	|| || 308967	IMAGE:1627504	-3.05899	-1.82856	0.597764	0.248181	0	3.88257
	LMO3 || LIM domain only 3 (rhombotin-like 2) || 227094	IMAGE:897262	-3.05654	-2.91336	0.953155	0.147218	0	3.9059
	|| || 224263	IMAGE:395794	-3.05193	-1.74811	0.572789	0.248687	0	3.94991
	BCL6 || B-cell CLL/lymphoma 6 (zinc finger protein 51) || 312398	IMAGE:826182	-3.04884	-1.543	0.506094	0.308526	0	3.97946
	|| || 120843	IMAGE:80729	-3.04766	-1.61344	0.529405	0.329447	0	3.99084
	|| || 118120	IMAGE:78294	-3.04278	-1.62144	0.532882	0.304347	0	4.03776
	CRYAB || Crystallin, alpha B || 118867	IMAGE:839736	-3.0397	-2.17983	0.717119	0.255953	0	4.06757
	GEFT || RAC/CDC42 exchange factor || 226890	IMAGE:1468443	-3.03607	-1.6277	0.536122	0.323509	0	4.10277
	FCER1G || Fc fragment of IgE, high affinity I, receptor for; gamma polypeptide || 115297	IMAGE:145932	-3.03311	-2.04332	0.673673	0.241159	0	4.1316
	LOC388886 || Similar to hypothetical protein LOC192734 || 115775	IMAGE:34007	-3.03092	-1.75685	0.579642	0.320026	0	4.153
	RUNX3 || Runt-related transcription factor 3 || 105839	IMAGE:291478	-3.01506	-1.84614	0.612305	0.301506	0	4.30909
	PRLR || Prolactin receptor || 220969	IMAGE:506128	-3.01307	-1.57556	0.522908	0.299513	0	4.32893
	FGA || **Fibrinogen, A alpha polypeptide || 99046	IMAGE:366541	-3.00927	-1.88439	0.626194	0.230993	0	4.3667
	RYR2 || Ryanodine receptor 2 (cardiac) || 100469	IMAGE:53099	-2.99835	-2.04759	0.682906	0.294518	0	4.47631
	|| CDNA clone IMAGE:4711494, partial cds || 102185	IMAGE:840708	-2.98607	-2.53256	0.848123	0.132449	0	4.60094
	LOC283666 || Hypothetical protein LOC283666 || 104816	IMAGE:45512	-2.98147	-1.66451	0.558285	0.280627	0	4.64807
	STK33 || Serine/threonine kinase 33 || 226590	IMAGE:1416035	-2.97706	-1.62621	0.546247	0.28514	0	4.6934
	MEG3 || **Maternally expressed 3 || 115276	IMAGE:206907	-2.95716	-3.59311	1.21505	0.206994	0	4.90033
	|| || 315485	IMAGE:1566937	-2.95713	-1.77	0.598553	0.277617	0	4.90066
	NPY1R || Neuropeptide Y receptor Y1 || 309117	IMAGE:143332	-2.94217	-2.03622	0.692082	0.332995	0	5.05892
	TUBB2 || Tubulin, beta, 2 || 106615	IMAGE:1492104	-2.91166	-1.81244	0.622478	0.247575	0	5.38867
	|| MRNA; cDNA DKFZp666I029 (from clone DKFZp666I029) || 101443	IMAGE:589512	-2.91155	-1.65434	0.568201	0.318109	0	5.38991
	LIMS3 || LIM and senescent cell antigen-like domains 3 || 110521	IMAGE:1031698	-2.90908	-1.71306	0.588867	0.284986	0	5.41694
	ISLR || Immunoglobulin superfamily containing leucine-rich repeat || 120448	IMAGE:236333	-2.88975	-1.89557	0.655963	0.254437	0	5.63131
	VTN || Vitronectin (serum spreading factor, somatomedin B, complement S-protein) || 105132	IMAGE:247546	-2.87967	-1.74114	0.604633	0.31318	0	5.7447
	|| || 100911	IMAGE:1017696	-2.87154	-2.42133	0.843218	0.275867	0	5.83687
	ERN1 || Endoplasmic reticulum to nucleus signalling 1 || 312169	IMAGE:1897716	-2.86978	-1.54862	0.53963	0.311536	0	5.85683
	AQP4 || Aquaporin 4 || 120371	IMAGE:46376	-2.8594	-1.76267	0.616447	0.305968	0	5.97577
	SERP1 || Stress-associated endoplasmic reticulum protein 1 || 106724	IMAGE:595070	-2.8519	-1.55633	0.545717	0.305018	0	6.06228
	|| CDNA clone IMAGE:4711494, partial cds || 309173	IMAGE:346860	-2.84323	-2.48419	0.87372	0.150746	0	6.16313
	|| || 223624	IMAGE:1473914	-2.8409	-1.536	0.540675	0.318806	0	6.1904
	AQP3 || Aquaporin 3 || 120491	IMAGE:196005	-2.84022	-1.71122	0.602497	0.286181	0	6.19833
	PDGFRB || Platelet-derived growth factor receptor, beta polypeptide || 102351	IMAGE:1593317	-2.8362	-2.158	0.760876	0.322137	0	6.24539
	CDKN1C || Cyclin-dependent kinase inhibitor 1C (p57, Kip2) || 312629	IMAGE:2314305	-2.82722	-1.82101	0.644098	0.326328	0	6.3513
	PDE5A || Phosphodiesterase 5A, cGMP-specific || 310289	IMAGE:1928922	-2.81547	-1.61937	0.575167	0.289052	0	6.49115
	SLC35F1 || Solute carrier family 35, member F1 || 99456	IMAGE:742826	-2.8115	-1.59322	0.566681	0.327105	0	6.53878
	SLA || Src-like-adaptor || 106664	IMAGE:815774	-2.78865	-1.84839	0.662826	0.242798	0	6.81576
	APOB || Apolipoprotein B (including Ag(x) antigen) || 111729	IMAGE:206632	-2.78696	-2.44067	0.875745	0.277913	0	6.83646
	QPRT || Quinolinate phosphoribosyltransferase (nicotinate-nucleotide pyrophosphorylase (carboxylating)) || 119176	IMAGE:263894	-2.78089	-1.81144	0.65139	0.331682	0	6.91104
	ENPP1 || Ectonucleotide pyrophosphatase/phosphodiesterase 1 || 115804	IMAGE:82991	-2.77249	-1.64311	0.592649	0.314011	0	7.01501
	|| Transcribed locus || 105097	IMAGE:1556322	-2.76435	-1.54256	0.558017	0.312207	0	7.11634
	DMWD || Dystrophia myotonica-containing WD repeat motif || 101203	IMAGE:123916	-2.7619	-2.844	1.02973	0.0854174	0	7.14704
	CD163 || CD163 antigen || 108401	IMAGE:727292	-2.75712	-2.11935	0.768681	0.166994	0	7.207
	SERPING1 || Serine (or cysteine) proteinase inhibitor, clade G (C1 inhibitor), member 1, (angioedema, hereditary) || 116990	IMAGE:756556	-2.75443	-2.137	0.775842	0.188571	0	7.2409
	LOC9884 || Hypothetical LOC9884 || 117857	IMAGE:900514	-2.7328	-1.82422	0.667529	0.328183	0	7.51598
	KIAA0692 || KIAA0692 protein || 225709	IMAGE:882402	-2.73076	-1.72611	0.632099	0.250926	0	7.54215
	|| || 308808	IMAGE:1556897	-2.71412	-2.50985	0.924739	0.300413	0	7.75753
	SSTR1 || Somatostatin receptor 1 || 318284	IMAGE:1663354	-2.69812	-1.54149	0.571319	0.311152	0	7.9673
	|| || 220871	IMAGE:450049	-2.69419	-1.51844	0.563599	0.309927	0	8.01928
	PCLO || Piccolo (presynaptic cytomatrix protein) || 104106	IMAGE:35812	-2.68703	-1.48867	0.55402	0.322845	0	8.11446
	WIPI49 || **WD40 repeat protein Interacting with phosphoInositides of 49kDa || 225716	IMAGE:179212	-2.67367	-1.51889	0.568091	0.317524	0	8.29332
	TM7SF2 || Transmembrane 7 superfamily member 2 || 307302	IMAGE:2020772	-2.67111	-1.92678	0.721339	0.219201	0	8.3278
	LTF || Lactotransferrin || 117363	IMAGE:460487	-2.65912	-2.165	0.814178	0.244329	0.0278463	8.49027
	|| || 319919	IMAGE:1590626	-2.64982	-1.76846	0.66739	0.241664	0.0278463	8.61742
	FMO5 || Flavin containing monooxygenase 5 || 119997	IMAGE:197525	-2.64723	-1.99189	0.752442	0.251202	0.0278463	8.65297
	EPB41L4B || Erythrocyte membrane protein band 4.1 like 4B || 118765	IMAGE:210698	-2.63731	-1.52644	0.578789	0.331767	0.0278463	8.78993
	TYROBP || TYRO protein tyrosine kinase binding protein || 102363	IMAGE:148469	-2.62785	-2.8243	1.07475	0.263941	0.0278463	8.92139
	FY || Duffy blood group || 117297	IMAGE:22411	-2.60931	-1.71396	0.656863	0.295326	0.0278463	9.18198
	FLJ21019 || Hypothetical protein FLJ21019 || 117031	IMAGE:809899	-2.5998	-1.42126	0.546679	0.32536	0.0278463	9.31708
	ALDOB || Aldolase B, fructose-bisphosphate || 102464	IMAGE:213607	-2.58958	-1.98233	0.765503	0.214686	0.0278463	9.46334
	CCL3 || Chemokine (C-C motif) ligand 3 || 98521	IMAGE:460398	-2.57421	-2.15053	0.835414	0.282355	0.0278463	9.68545
	ACADL || Acyl-Coenzyme A dehydrogenase, long chain || 110207	IMAGE:140131	-2.56177	-1.63605	0.638639	0.28813	0.0278463	9.86711
	TRPV6 || Transient receptor potential cation channel, subfamily V, member 6 || 110724	IMAGE:417424	-2.56117	-1.91944	0.749441	0.307423	0.0278463	9.87597
	|| || 109207	IMAGE:280977	-2.54091	-1.84875	0.727597	0.288544	0.0278463	10.1756
	BGN || Biglycan || 111282	IMAGE:144786	-2.52592	-1.93922	0.767729	0.252551	0.0278463	10.4001
	GFPT2 || Glutamine-fructose-6-phosphate transaminase 2 || 316117	IMAGE:2110301	-2.52176	-1.79467	0.711673	0.315398	0.0278463	10.4629
	GOLGIN-67 || Golgin-67 || 223939	IMAGE:378032	-2.50363	-1.47989	0.591098	0.312718	0.0278463	10.7387
	LYPDC1 || LY6/PLAUR domain containing 1 || 222975	IMAGE:877789	-2.50113	-1.60089	0.640067	0.276059	0.0278463	10.7769
	|| CDNA clone IMAGE:4711494, partial cds || 98697	IMAGE:78148	-2.49337	-2.10889	0.845798	0.165129	0.0278463	10.8962
	EPB41L3 || **Erythrocyte membrane protein band 4.1-like 3 || 112111	IMAGE:768417	-2.49225	-2.42406	0.972638	0.306462	0.0278463	10.9135
	DKFZP586A0522 || DKFZP586A0522 protein || 104358	IMAGE:136070	-2.46637	-1.90644	0.772977	0.30324	0.0278463	11.3166
	FN3K || Fructosamine 3 kinase || 316787	IMAGE:1895613	-2.46113	-1.85847	0.755127	0.32056	0.0278463	11.3991
	FRZB || Frizzled-related protein || 115963	IMAGE:223661	-2.45544	-2.00011	0.814565	0.253243	0.0278463	11.4891
	CRLF1 || Cytokine receptor-like factor 1 || 222273	IMAGE:379768	-2.45379	-3.01522	1.2288	0.311268	0.0278463	11.5153
	PANX1 || Pannexin 1 || 108509	IMAGE:745672	-2.44714	-1.95322	0.798165	0.308388	0.0278463	11.6209
	TNFSF7 || Tumor necrosis factor (ligand) superfamily, member 7 || 310604	IMAGE:1916687	-2.4379	-2.41922	0.99234	0.318959	0.0278463	11.7686
	FLJ20366 || Hypothetical protein FLJ20366 || 118700	IMAGE:77911	-2.41487	-1.44067	0.59658	0.313951	0.0542879	12.1408
	FLJ14351 || Hypothetical protein FLJ14351 || 227021	IMAGE:744943	-2.39611	-1.46993	0.613466	0.325947	0.0542879	12.4483
	MGC23908 || Similar to transcription factor BTF3 || 319811	IMAGE:1932740	-2.39404	-1.68267	0.702857	0.24354	0.0542879	12.4826
	CTF1 || Cardiotrophin 1 || 112770	IMAGE:1461737	-2.38395	-1.73402	0.727373	0.226647	0.0542879	12.6498
	MGC16037 || Hypothetical protein MGC16037 || 119742	IMAGE:346545	-2.37405	-1.38733	0.584374	0.330747	0.0542879	12.8151
	CBLN2 || Cerebellin 2 precursor || 110377	IMAGE:44253	-2.37142	-1.4495	0.611238	0.326669	0.0542879	12.8592
	CHI3L1 || Chitinase 3-like 1 (cartilage glycoprotein-39) || 107178	IMAGE:770212	-2.31128	-1.9086	0.825775	0.265669	0.0542879	13.8875
	GNG2 || Guanine nucleotide binding protein (G protein), gamma 2 || 112310	IMAGE:109309	-2.28584	-1.70897	0.747633	0.289756	0.0542879	14.3344
	LIPC || **Lipase, hepatic || 118556	IMAGE:292637	-2.28224	-1.776	0.778182	0.276815	0.0542879	14.398
	XIST || X (inactive)-specific transcript || 245365	IMAGE:301740	-2.28173	-2.48733	1.09011	0.193583	0.0542879	14.4072
	COL3A1 || Collagen, type III, alpha 1 (Ehlers-Danlos syndrome type IV, autosomal dominant) || 111790	IMAGE:2256743	-2.28064	-1.82499	0.800209	0.300431	0.0542879	14.4265
	MAN1A1 || Mannosidase, alpha, class 1A, member 1 || 110662	IMAGE:112629	-2.27523	-1.45007	0.637327	0.319917	0.0542879	14.5226
	DCHS1 || Dachsous 1 (Drosophila) || 114396	IMAGE:813735	-2.26654	-2.75648	1.21616	0.318385	0.0542879	14.6777
	DCT || **Dopachrome tautomerase (dopachrome delta-isomerase, tyrosine-related protein 2) || 102299	IMAGE:753104	-2.25892	-1.51286	0.669729	0.290456	0.0542879	14.8144
