# Supplementary material for: Gene Expression Patterns in Pancreatic Tumors, Cells and Tissues
Source: PLoS One. 2007 Mar 28;2(3):e323. doi: 10.1371/journal.pone.0000323 (PMC1824711; doi:10.1371/journal.pone.0000323)
Supplement: Data S5 — List of genes within the islet cell tumor cluster. Annotated list of genes identified by SAM that are differentially expressed in islet tumors compared to all other pancreatic tissues in the dataset. (0.43 MB XLS) [file pone.0000323.s005.xls]

## Sheet: Table of Contents
Supplement 5 - Islet Cell Tumors
1. Annotated list of 311 genes within the "Islet" cluster
2. Significance Analysis of Microarrays (SAM) of genes differentially expressed in islet cell tumors. Chromosome location is also indicated.
3. Annotated list of genes identified by SAM with enhanced expression in islet cell tumors

## Sheet: 1. Islet Cluster
Islet cell tumor cluster - 311 genes with correlation 0.751
CloneID	Symbol	Name	UGCluster	SumFunc	SPLocal
IMAGE:530185	CD83	CD83 antigen (activated B lymphocytes, immunoglobulin superfamily)	Hs.484703		type i membrane protein.
IMAGE:307471	TM4SF2	Tetraspanin 7	Hs.441664	The protein encoded by this gene is a member of the transmembrane 4 superfamily, also known as the tetraspanin family. Most of these members are cell-surface proteins that are characterized by the presence of four hydrophobic domains. The proteins mediate signal transduction events that play a role in the regulation of cell development, activation, growth and motility. This encoded protein is a c…	integral membrane protein.
IMAGE:28643	HDHD2	Haloacid dehalogenase-like hydrolase domain containing 2	Hs.465041
IMAGE:307510		Similar to CDC42-binding protein kinase alpha isoform A; ser-thr protein kinase related to the myotonic dystrophy protein kinase; ser-thr protein kinase PK428; myotonic dystrophy kinase-related CDC42-binding protein kinase alpha; CDC42 binidng prot...	Hs.510701
IMAGE:1573520	RNF167	Ring finger protein 167	Hs.7158
IMAGE:52635	MED9	Mediator of RNA polymerase II transcription, subunit 9 homolog (yeast)	Hs.244595	The multiprotein Mediator complex is a coactivator required for activation of RNA polymerase II transcription by DNA bound transcription factors. The protein encoded by this gene is thought to be a subunit of the Mediator complex. This gene is located within the Smith-Magenis syndrome region on chromosome 17.
IMAGE:1657296	POT1	POT1 protection of telomeres 1 homolog (S. pombe)	Hs.31968	The POT1 gene encodes a protein conserved across widely diverged eukaryotes that binds the G-rich strand of its own telomeric repeat sequence, consistent with a direct role in protecting chromosome ends.[supplied by OMIM]
IMAGE:40063		CDNA FLJ13558 fis, clone PLACE1007743	Hs.86043
IMAGE:767402	MRPL48	Mitochondrial ribosomal protein L48	Hs.503239	Mammalian mitochondrial ribosomal proteins are encoded by nuclear genes and help in protein synthesis within the mitochondrion. Mitochondrial ribosomes (mitoribosomes) consist of a small 28S subunit and a large 39S subunit. They have an estimated 75% protein to rRNA composition compared to prokaryotic ribosomes, where this ratio is reversed. Another difference between mammalian mitoribosomes and …
IMAGE:1574649	REV3L	REV3-like, catalytic subunit of DNA polymerase zeta (yeast)	Hs.232021		nuclear (potential).
IMAGE:713288	METAP2	Methionyl aminopeptidase 2	Hs.444986
IMAGE:824936	Cep290	Hypothetical protein DKFZp434N2030	Hs.150444
IMAGE:34898	LOC153364	Similar to metallo-beta-lactamase superfamily protein	Hs.64004
IMAGE:287634	WDR35	WD repeat domain 35	Hs.205427	This gene encodes a member of the WD repeat protein family. WD repeats are minimally conserved regions of approximately 40 amino acids typically bracketed by gly-his and trp-asp (GH-WD), which may facilitate formation of heterotrimeric or multiprotein complexes. Members of this family are involved in a variety of cellular processes, including cell cycle progression, signal transduction, apoptosis…
IMAGE:25049	ZNF302	Zinc finger protein 302	Hs.436350
IMAGE:137236			Data not found
IMAGE:1685029	HBS1L	HBS1-like (S. cerevisiae)	Hs.378532
IMAGE:247614	SPAG9	Sperm associated antigen 9	Hs.463439	Extracellular signals are transduced into cells through mitogen-activated protein kinases. The structural organization of these kinases into specific signaling domains is facilitated by scaffolding proteins involved in closely tethering different kinases so that successive phosphorylation events can occur. The protein encoded by this gene is a scaffolding protein that brings together mitogen-acti…
IMAGE:726464			Data not found
IMAGE:726488	IER3IP1	Immediate early response 3 interacting protein 1	Hs.130917
IMAGE:49839	AHI1	Abelson helper integration site	Hs.386684
IMAGE:785342	ARMCX3	Armadillo repeat containing, X-linked 3	Hs.172788	This gene encodes a member of the ALEX family of proteins which may play a role in tumor suppression. The encoded protein contains a potential N-terminal transmembrane domain and a single Armadillo (arm) repeat. Other proteins containing the arm repeat are involved in development, maintenance of tissue integrity, and tumorigenesis. This gene is closely localized with other family members on the X…
IMAGE:283233			Data not found
IMAGE:251452	ARMCX3	Armadillo repeat containing, X-linked 3	Hs.172788	This gene encodes a member of the ALEX family of proteins which may play a role in tumor suppression. The encoded protein contains a potential N-terminal transmembrane domain and a single Armadillo (arm) repeat. Other proteins containing the arm repeat are involved in development, maintenance of tissue integrity, and tumorigenesis. This gene is closely localized with other family members on the X…
IMAGE:813287			Data not found
IMAGE:1572710	CAS1	O-acetyltransferase	Hs.260041
IMAGE:263883	DHX40	DEAH (Asp-Glu-Ala-His) box polypeptide 40	Hs.29403	DDX40 is a member of the DExH/D box family of ATP-dependent RNA helicases. RNA helicases catalyze the unwinding of double-stranded RNA and play a role in RNA metabolism, including pre-mRNA splicing, ribosome biogenesis, and organellar gene expression.[supplied by OMIM]
IMAGE:203846	DHX40	DEAH (Asp-Glu-Ala-His) box polypeptide 40	Hs.29403	DDX40 is a member of the DExH/D box family of ATP-dependent RNA helicases. RNA helicases catalyze the unwinding of double-stranded RNA and play a role in RNA metabolism, including pre-mRNA splicing, ribosome biogenesis, and organellar gene expression.[supplied by OMIM]
IMAGE:767116		Hypothetical LOC133993	Hs.69504
IMAGE:48142	IPO9	Importin 9	Hs.497384
IMAGE:1874136			Data not found
IMAGE:153830	AACS	Acetoacetyl-CoA synthetase	Hs.169054
IMAGE:111006	KIF3B	Kinesin family member 3B	Hs.369670	The protein encoded by this gene acts as a heterodimer with kinesin family member 3A to aid in chromosome movement during mitosis and meiosis. The encoded protein is a plus end-directed microtubule motor and can interact with the SMC3 subunit of the cohesin complex. In addition, the encoded protein may be involved in the intracellular movement of membranous organelles. This protein and kinesin fa…
IMAGE:626544	MYO10	Myosin X	Hs.481720
IMAGE:460646	MYO10	Myosin X	Hs.481720
IMAGE:111150	LNX	Ligand of numb-protein X	Hs.407755
IMAGE:770848	ZNF507	Zinc finger protein 507	Hs.205392
IMAGE:502778	LRP6	Low density lipoprotein receptor-related protein 6	Hs.210343
IMAGE:701711			Data not found
IMAGE:1668636		CDNA clone IMAGE:4815736, partial cds	Hs.21816
IMAGE:399336	PDE8B	Phosphodiesterase 8B	Hs.78106
IMAGE:282688	PDE8B	Phosphodiesterase 8B	Hs.78106
IMAGE:795901		Transcribed locus	Hs.9012
IMAGE:796334		Transcribed locus	Hs.22542
IMAGE:197300	ZNF397	Zinc finger protein 397	Hs.464896
IMAGE:754148	HYPC	Huntingtin interacting protein C	Hs.33104
IMAGE:767991		MRNA (clone ICRFp507I1077)	Hs.43744
IMAGE:711918	QPCT	Glutaminyl-peptide cyclotransferase (glutaminyl cyclase)	Hs.79033	This gene encodes human pituitary glutaminyl cyclase, which is responsible for the presence of pyroglutamyl residues in many neuroendocrine peptides. The amino acid sequence of this enzyme is 86% identical to that of bovine glutaminyl cyclase.
IMAGE:48226			In multiple clusters
IMAGE:1872367	LOC90313	Hypothetical protein BC004507	Hs.514050
IMAGE:181541			In multiple clusters
IMAGE:1697707			Data not found
IMAGE:283142	KIAA1244	KIAA1244	Hs.194408
IMAGE:41826	LOC202451	Hypothetical protein LOC202451	Hs.529976
IMAGE:33930	SLC35F3	Solute carrier family 35, member F3	Hs.158748
IMAGE:46477	CPLX2	Complexin 2	Hs.193235	Proteins encoded by the complexin/synaphin gene family are cytosolic proteins that function in synaptic vesicle exocytosis. These proteins bind syntaxin, part of the SNAP receptor. The protein product of this gene binds to the SNAP receptor complex and disrupts it, allowing transmitter release. Two transcript variants encoding the same protein have been found for this gene.
IMAGE:252830			Data not found
IMAGE:1602597			Data not found
IMAGE:1601845	HSPC047	HSPC047 protein	Hs.530089
IMAGE:970484	GABRA1	Gamma-aminobutyric acid (GABA) A receptor, alpha 1	Hs.175934	GABA is the major inhibitory neurotransmitter in the mammalian brain where it acts at GABA-A receptors, which are ligand-gated chloride channels. Chloride conductance of these channels can be modulated by agents such as benzodiazepines that bind to the GABA-A receptor. At least 16 distinct subunits of GABA-A receptors have been identified.	integral membrane protein.
IMAGE:2028515	SMARCA1	SWI/SNF related, matrix associated, actin dependent regulator of chromatin, subfamily a, member 1	Hs.152292	The protein encoded by this gene is a member of the SWI/SNF family of proteins. Members of this family have helicase and ATPase activities and are thought to regulate transcription of certain genes by altering the chromatin structure around those genes. Two transcript variants encoding different isoforms have been found for this gene.	nuclear.
IMAGE:897667	SMARCA1	SWI/SNF related, matrix associated, actin dependent regulator of chromatin, subfamily a, member 1	Hs.152292	The protein encoded by this gene is a member of the SWI/SNF family of proteins. Members of this family have helicase and ATPase activities and are thought to regulate transcription of certain genes by altering the chromatin structure around those genes. Two transcript variants encoding different isoforms have been found for this gene.	nuclear.
IMAGE:296492		Transcribed locus	Hs.224170
IMAGE:131791	SFRS11	Splicing factor, arginine/serine-rich 11	Hs.479693	This gene encodes 54-kD nuclear protein that contains an arginine/serine-rich region similar to segments found in pre-mRNA splicing factors. Although the function of this protein is not yet known, structure and immunolocalization data suggest that it may play a role in pre-mRNA processing.	nuclear. colocalizes with spliceosome components.
IMAGE:1030953	LOC80298	Transcription termination factor-like protein	Hs.5009
IMAGE:290149	POMT2	Protein-O-mannosyltransferase 2	Hs.132989	POMT2 encodes an integral membrane protein of the endoplasmic reticulum (ER) that shares significant sequence similarity with a family of protein O-mannosyltransferases of S. cerevisiae. For additional background information, see POMT1 (MIM 607423).[supplied by OMIM]
IMAGE:121558	KIAA0232	KIAA0232 gene product	Hs.79276
IMAGE:855624	ALDH1A1	Aldehyde dehydrogenase 1 family, member A1	Hs.76392	This protein belongs to the aldehyde dehydrogenases family of proteins. Aldehyde dehydrogenase is the second enzyme of the major oxidative pathway of alcohol metabolism. Two major liver isoforms of this enzyme, cytosolic and mitochondrial, can be distinguished by their electrophoretic mobilities, kinetic properties, and subcellular localizations. Most Caucasians have two major isozymes, while app…	cytoplasmic.
IMAGE:24181	KIAA0895	KIAA0895 protein	Hs.6224
IMAGE:50484	CCRK	Cell cycle related kinase	Hs.522274	The protein encoded by this gene contains a kinase domain most closely related to the cyclin-dependent protein kinases. Alternatively spliced transcript variants encoding distinct isoforms have been reported.
IMAGE:462625		CDNA clone IMAGE:4641243, partial cds	Hs.281111
IMAGE:142647	FLJ20345	Hypothetical protein FLJ20345	Hs.408843
IMAGE:462431	USP20	Ubiquitin specific protease 20	Hs.5452
IMAGE:159166	EXOC7	Exocyst complex component 7	Hs.533985
IMAGE:897979	FLJ10769	Hypothetical protein FLJ10769	Hs.408324
IMAGE:784000	FLJ10769	Hypothetical protein FLJ10769	Hs.408324
IMAGE:878587	MGC32124	Hypothetical protein MGC32124	Hs.513871
IMAGE:53022	GABRB3	Gamma-aminobutyric acid (GABA) A receptor, beta 3	Hs.302352	The gamma-aminobutyric acid (GABA) A receptor is a multisubunit chloride channel that mediates the fastest inhibitory synaptic transmission in the central nervous system. This gene is mapped to chromosome 15q11.2-q12 in a cluster that includes the alpha 5, and gamma 3 subunit genes of the GABA receptor. Alternative splicing generates 2 transcript variants. Deletion mutation of this gene may be in…	integral membrane protein.
IMAGE:51851			In multiple clusters
IMAGE:2017947	HMX1	Homeo box (H6 family) 1	Hs.104134
IMAGE:310519	F10	Coagulation factor X	Hs.361463	This gene encodes the vitamin K-dependent coagulation factor X precursor of the blood coagulation cascade. This factor precursor is converted to a mature two-chain form by the excision of the tripeptide RKR. Two chains of the factor are held together by 1 or more disulfide bonds; the light chain contains 2 EGF-like domains, while the heavy chain contains the catalytic domain which is structurally…
IMAGE:195340	GC	Group-specific component (vitamin D binding protein)	Hs.418497	The protein encoded by this gene belongs to the albumin gene family. It is a multifunctional protein found in plasma, ascitic fluid, cerebrospinal fluid and on the surface of many cell types. It binds to vitamin D and its plasma metabolites and transports them to target tissues.	secreted.
IMAGE:122140	GC	Group-specific component (vitamin D binding protein)	Hs.418497	The protein encoded by this gene belongs to the albumin gene family. It is a multifunctional protein found in plasma, ascitic fluid, cerebrospinal fluid and on the surface of many cell types. It binds to vitamin D and its plasma metabolites and transports them to target tissues.	secreted.
IMAGE:240518	SERPINA6	Serine (or cysteine) proteinase inhibitor, clade A (alpha-1 antiproteinase, antitrypsin), member 6	Hs.532635	Corticosteroid-binding globulin, otherwise known as transcortin, is an alpha-globulin. CBG localizes to a region containing two closely related serine protease inhibitors which may have evolved by duplication events.	secreted.
IMAGE:247546	VTN	Vitronectin (serum spreading factor, somatomedin B, complement S-protein)	Hs.2257	The protein encoded by this gene is a member of the pexin family. It is found in serum and tissues and promotes cell adhesion and spreading, inhibits the membrane-damaging effect of the terminal cytolytic complement pathway, and binds to several serpin serine protease inhibitors. It is a secreted protein and exists in either a single chain form or a clipped, two chain form held together by a disu…	extracellular.
IMAGE:293240	SLC38A4	Solute carrier family 38, member 4	Hs.446077	SLC38A4 is found predominantly in liver and transports both cationic and neutral amino acids. The transport of cationic amino acids by SLC38A4 is Na(+) and pH independent, while the transport of neutral amino acids is Na(+) and pH dependent (Hatanaka et al., 2001).[supplied by OMIM]
IMAGE:128426	WBSCR14	Williams Beuren syndrome chromosome region 14	Hs.520446	This gene encodes a basic helix-loop-helix leucine zipper transcription factor of the Myc/Max/Mad superfamily. It may play a role in cell proliferation and/or differentiation. It is deleted in Williams-Beuren syndrome, a multisystem developmental disorder caused by the deletion of contiguous genes at chromosome 7q11.23. This gene contains 17 exons; its alternative splicing generates 5 transcript …
IMAGE:361688	DPP6	Dipeptidylpeptidase 6	Hs.490684	The protein encoded by this gene is the human ortholog of bovine and rat dipeptidylpeptidase VI. They are transmembrane proteins and likely members of the dipeptidyl aminopeptidase family. Two transcript variants encoding different isoforms have been identified in all 3 species. In bovine and rat, the longer form has been shown to be expressed almost exclusively in brain, whereas the shorter form…	type ii membrane protein (probable).
IMAGE:884338	KIAA1409	KIAA1409	Hs.126561
IMAGE:25302	KIAA1409	KIAA1409	Hs.126561
IMAGE:723986	TMOD1	Tropomodulin 1	Hs.404289
IMAGE:293859	TUSC3	Tumor suppressor candidate 3	Hs.426324	This gene is a candidate tumor suppressor gene. It is located within a homozygously deleted region of a metastatic prostate cancer. The gene is expressed in most nonlymphoid human tissues including prostate, lung, liver, and colon. Expression was also detected in many epithelial tumor cell lines. Two transcript variants encoding distinct isoforms have been identified for this gene.
IMAGE:1699281	TUSC3	Tumor suppressor candidate 3	Hs.426324	This gene is a candidate tumor suppressor gene. It is located within a homozygously deleted region of a metastatic prostate cancer. The gene is expressed in most nonlymphoid human tissues including prostate, lung, liver, and colon. Expression was also detected in many epithelial tumor cell lines. Two transcript variants encoding distinct isoforms have been identified for this gene.
IMAGE:1155481	TUSC3	Tumor suppressor candidate 3	Hs.426324	This gene is a candidate tumor suppressor gene. It is located within a homozygously deleted region of a metastatic prostate cancer. The gene is expressed in most nonlymphoid human tissues including prostate, lung, liver, and colon. Expression was also detected in many epithelial tumor cell lines. Two transcript variants encoding distinct isoforms have been identified for this gene.
IMAGE:845521	SCGN	Secretagogin, EF-hand calcium binding protein	Hs.116428	The encoded protein is a secreted calcium-binding protein which is found in the cytoplasm. It is related to calbindin D-28K and calretinin. This protein is thought to be involved in KCL-stimulated calcium flux and cell proliferation.	cytoplasmic.
IMAGE:129447			Data not found
IMAGE:1868590	GALK2	Galactokinase 2	Hs.117532	This gene encodes a highly efficient N-acetylgalactosamine (GalNAc) kinase, which has galactokinase activity when galactose is present at high concentrations. Two alternatively spliced transcript variants encoding different isoforms have been found for this gene.
IMAGE:1868551	TTR	Transthyretin (prealbumin, amyloidosis type I)	Hs.427202		secreted.
IMAGE:129589	TTR	Transthyretin (prealbumin, amyloidosis type I)	Hs.427202		secreted.
IMAGE:129613	PAX5	Paired box gene 5 (B-cell lineage specific activator)	Hs.126365	The PAX5 gene is a member of the paired box (PAX) family of transcription factors. The central feature of this gene family is a novel, highly conserved DNA-binding motif, known as the paired box. The PAX proteins are important regulators in early development, and alterations in the expression of their genes are thought to contribute to neoplastic transformation. The PAX5 gene encodes the B-cell l…	nuclear.
IMAGE:1868265	DNAJB5	DnaJ (Hsp40) homolog, subfamily B, member 5	Hs.237506
IMAGE:128948	P15RS	Hypothetical protein FLJ10656	Hs.464912
IMAGE:51097			In multiple clusters
IMAGE:289645	APLP1	Amyloid beta (A4) precursor-like protein 1	Hs.74565		type i membrane protein. c-terminally processed in the golgi complex.
IMAGE:284160	CACNA2D2	Calcium channel, voltage-dependent, alpha 2/delta subunit 2	Hs.476273	This gene encodes a member of the alpha-2/delta subunit family, a protein in the voltage-dependent calcium channel complex. Calcium channels mediate the influx of calcium ions into the cell upon membrane polarization and consist of a complex of alpha-1, alpha-2/delta, beta, and gamma subunits in a 1:1:1:1 ratio. Various versions of each of these subunits exist, either expressed from similar genes…
IMAGE:26249	SH3GL2	SH3-domain GRB2-like 2	Hs.75149		cytoplasmic, and peripheral membrane protein. concentrated in presynaptic nerve terminals in neurons.
IMAGE:24254	PCSK2	Proprotein convertase subtilisin/kexin type 2	Hs.315186	The protein encoded by this gene belongs to the subtilisin-like proprotein convertase family. The members of this family are proprotein convertases that process latent precursor proteins into their biologically active products. This encoded protein is a proinsulin-processing enzyme that plays a key role in regulating insulin biosynthesis. It is also known to cleave proopiomelanocortin, proenkepha…	localized in the secretion granules.
IMAGE:2060385	CACNA1A	Calcium channel, voltage-dependent, P/Q type, alpha 1A subunit	Hs.408449	Voltage-dependent calcium channels mediate the entry of calcium ions into excitable cells, and are also involved in a variety of calcium-dependent processes, including muscle contraction, hormone or neurotransmitter release, and gene expression. Calcium channels are multisubunit complexes composed of alpha-1, beta, alpha-2/delta, and gamma subunits. The channel activity is directed by the pore-fo…	integral membrane protein.
IMAGE:382654	PCSK2	Proprotein convertase subtilisin/kexin type 2	Hs.315186	The protein encoded by this gene belongs to the subtilisin-like proprotein convertase family. The members of this family are proprotein convertases that process latent precursor proteins into their biologically active products. This encoded protein is a proinsulin-processing enzyme that plays a key role in regulating insulin biosynthesis. It is also known to cleave proopiomelanocortin, proenkepha…	localized in the secretion granules.
IMAGE:767475			In multiple clusters
IMAGE:1585535	CHGA	Chromogranin A (parathyroid secretory protein 1)	Hs.150793	The protein encoded by this gene is a member of the chromogranin/secretogranin family of neuroendocrine secretory proteins. It is found in secretory vesicles of neurons and endocrine cells. This gene product is a precursor to three biologically active peptides; vasostatin, pancreastatin, and parastatin. These peptides act as autocrine or paracrine negative modulators of the neuroendocrine system.…	neuroendocrine and endocrine secretory granules.
IMAGE:1600221	MARCKSL1	MARCKS-like 1	Hs.75061
IMAGE:1558108	ABCC8	ATP-binding cassette, sub-family C (CFTR/MRP), member 8	Hs.54470	The protein encoded by this gene is a member of the superfamily of ATP-binding cassette (ABC) transporters. ABC proteins transport various molecules across extra- and intra-cellular membranes. ABC genes are divided into seven distinct subfamilies (ABC1, MDR/TAP, MRP, ALD, OABP, GCN20, White). This protein is a member of the MRP subfamily which is involved in multi-drug resistance. This protein fu…	integral membrane protein.
IMAGE:1556976	B3GALT2	UDP-Gal:betaGlcNAc beta 1,3-galactosyltransferase, polypeptide 2	Hs.518834	This gene is a member of the beta-1,3-galactosyltransferase (beta3GalT) gene family. This family encodes type II membrane-bound glycoproteins with diverse enzymatic functions using different donor substrates (UDP-galactose and UDP-N-acetylglucosamine) and different acceptor sugars (N-acetylglucosamine, galactose, N-acetylgalactosamine). The beta3GalT genes are distantly related to the Drosophila …
IMAGE:858401	SCG3	Secretogranin III	Hs.232618	The protein encoded by this gene is a member of the chromogranin/secretogranin family of neuroendocrine secretory proteins. Granins may serve as precursors for biologically active peptides. Some granins have been shown to function as helper proteins in sorting and proteolytic processing of prohormones; however, the function of this protein is unknown.
IMAGE:878836			Data not found
IMAGE:33941	PTPRN	Protein tyrosine phosphatase, receptor type, N	Hs.89655	The protein encoded by this gene is a member of the protein tyrosine phosphatase (PTP) family. PTPs are known to be signaling molecules that regulate a variety of cellular processes including cell growth, differentiation, mitotic cycle, and oncogenic transformation. This PTP possesses an extracellular region, a single transmembrane region, and a single catalytic domain, and thus represents a rece…	type i membrane protein. neuroendocrine secretory granules.
IMAGE:2021039	MGC26694	Hypothetical protein MGC26694	Hs.303669
IMAGE:2019217	SYP	Synaptophysin	Hs.75667	Synaptophysin (p38) is an integral membrane protein of small synaptic vesicles in brain and endocrine cells.[supplied by OMIM]	integral membrane protein. synaptic vesicles.
IMAGE:1456155	SLC22A17	Solute carrier family 22 (organic cation transporter), member 17	Hs.373498
IMAGE:395794			Data not found
IMAGE:322148	CHGB	Chromogranin B (secretogranin 1)	Hs.516874	Chromogranin B is a tyrosine-sulfated secretory protein found in a wide variety of peptidergic endocrine cells. Chromogranin functions as a neuroendocrine secretory granule protein which may be the precursor for other biologically active peptides.	neuroendocrine and endocrine secretory granules.
IMAGE:39843	TNRC4	Trinucleotide repeat containing 4	Hs.26047
IMAGE:298104	DZIP1	DAZ interacting protein 1	Hs.157002
IMAGE:782581	DZIP1	DAZ interacting protein 1	Hs.157002
IMAGE:49509	EPOR	Erythropoietin receptor	Hs.127826	The erythropoietin receptor is a member of the cytokine receptor family. Upon erythropoietin binding, the erythropoietin receptor activates Jak2 tyrosine kinase which activates different intracellular pathways including: Ras/MAP kinase, phosphatidylinositol 3-kinase and STAT transcription factors. The stimulated erythropoietin receptor appears to have a role in erythroid cell survival. Defects in…	type i membrane protein. isoform epor-s is secreted and located to the cell surface.
IMAGE:66478	EPOR	Erythropoietin receptor	Hs.127826	The erythropoietin receptor is a member of the cytokine receptor family. Upon erythropoietin binding, the erythropoietin receptor activates Jak2 tyrosine kinase which activates different intracellular pathways including: Ras/MAP kinase, phosphatidylinositol 3-kinase and STAT transcription factors. The stimulated erythropoietin receptor appears to have a role in erythroid cell survival. Defects in…	type i membrane protein. isoform epor-s is secreted and located to the cell surface.
IMAGE:714472	RUTBC1	RUN and TBC1 domain containing 1	Hs.513861
IMAGE:1009922	ACTR6	ARP6 actin-related protein 6 homolog (yeast)	Hs.115088
IMAGE:767486			In multiple clusters
IMAGE:767477	ZNF297B	Zinc finger protein 297B	Hs.355581		nuclear (probable).
IMAGE:758304	SLC25A14	Solute carrier family 25 (mitochondrial carrier, brain), member 14	Hs.194686	Mitochondrial uncoupling proteins (UCP) are members of the larger family of mitochondrial anion carrier proteins (MACP). UCPs separate oxidative phosphorylation from ATP synthesis with energy dissipated as heat, also referred to as the mitochondrial proton leak. UCPs facilitate the transfer of anions from the inner to the outer mitochondrial membrane and the return transfer of protons from the ou…	integral membrane protein. mitochondrial inner membrane (by similarity).
IMAGE:1898813	SFRS12	Splicing factor, arginine/serine-rich 12	Hs.519347	SFRS12 belongs to the superfamily of serine/arginine-rich (SR) splicing factors. It modulates splice site selection by regulating the activities of other SR proteins (Barnard et al., 2002).[supplied by OMIM]
IMAGE:450938	DKFZP586A0522	DKFZP586A0522 protein	Hs.288771
IMAGE:70152	DKFZP586A0522	DKFZP586A0522 protein	Hs.288771
IMAGE:725877			In multiple clusters
IMAGE:589362			In multiple clusters
IMAGE:812968	PTPRN2	Protein tyrosine phosphatase, receptor type, N polypeptide 2	Hs.490789	The protein encoded by this gene is a member of the protein tyrosine phosphatase (PTP) family. PTPs are known to be signaling molecules that regulate a variety of cellular processes including cell growth, differentiation, mitotic cycle, and oncogenic transformation. This PTP possesses an extracellular region, a single transmembrane region, and a single intracellular catalytic domain, and thus rep…	type i membrane protein (probable).
IMAGE:1605562		Transcribed locus	Hs.489491
IMAGE:146526	FIP1L1	FIP1 like 1 (S. cerevisiae)	Hs.518760
IMAGE:285443	C21orf34	Chromosome 21 open reading frame 34	Hs.473394
IMAGE:772891	MAP2K1IP1	Mitogen-activated protein kinase kinase 1 interacting protein 1	Hs.433332	The protein encoded by this gene was identified as an interacting protein that binds specifically to MAP kinase kinase MAP2K1/MEK1 and to MAP kinase MAPK2/ERK1. This protein enhances the activation of MAPK2, and thus is thought to function as an adaptor to enhance the efficiency of the MAP kinase cascade.
IMAGE:813165	PGRMC2	Progesterone receptor membrane component 2	Hs.507910
IMAGE:813424			Data not found
IMAGE:1908914	FLJ35220	Hypothetical protein FLJ35220	Hs.389678
IMAGE:795863	DGKE	Diacylglycerol kinase, epsilon 64kDa	Hs.239514	Diacylglycerol kinases are thought to be involved mainly in the regeneration of phosphatidylinositol (PI) from diacylglycerol in the PI-cycle during cell signal transduction. When expressed in mammalian cells, DGK-epsilon shows specificity for arachidonyl-containing diacylglycerol. DGK-epsilon is expressed predominantly in testis.
IMAGE:257637	RRBP1	Ribosome binding protein 1 homolog 180kDa (dog)	Hs.472213	Analysis of cDNA clones indicates that ribosome binding protein 1 may exist in different forms due to removal of tandem repeats, or partial intraexonic splicing of RRBP1. The form presented here is lacking the canine p180 ribosome-binding domain, NQGKKAEGAQ, which is tandemly repeated close to the N-terminus in other forms that haven't been fully characterized. RRBP1 has been excluded as a candid…	type iii membrane protein. endoplasmic reticulum (by similarity).
IMAGE:452880		Transcribed locus, strongly similar to NP_060011.1 crystallin, gamma S; crystallin, gamma 8 [Homo sapiens]	Hs.497253
IMAGE:35812	PCLO	Piccolo (presynaptic cytomatrix protein)	Hs.12376	Synaptic vesicles dock and fuse in the active zone of the plasma membrane at chemical synapses. The presynaptic cytoskeletal matrix (PCM), which is associated with the active zone and is situated between synaptic vesicles, is thought to be involved in maintaining the neurotransmitter release site in register with the postsynaptic reception apparatus. The cycling of synaptic vesicles is a multiste…	concentrated at the presynaptic side of synaptic junctions (by similarity).
IMAGE:40364	FLJ10052	Sushi domain containing 4	Hs.497841
IMAGE:564382	ELAVL4	ELAV (embryonic lethal, abnormal vision, Drosophila)-like 4 (Hu antigen D)	Hs.213050
IMAGE:782537		Similar to hypothetical protein A230046P18; cDNA sequence BC055759	Hs.131740
IMAGE:1505294		Similar to hypothetical protein A230046P18; cDNA sequence BC055759	Hs.447654
IMAGE:814482	LOC81558	C/EBP-induced protein	Hs.514308
IMAGE:346484	ATPAF1	ATP synthase mitochondrial F1 complex assembly factor 1	Hs.10964
IMAGE:1055817	GKAP1	G kinase anchoring protein 1	Hs.522255
IMAGE:506128	PRLR	Prolactin receptor	Hs.368587		type i membrane protein.
IMAGE:321658	PRLR	Prolactin receptor	Hs.368587		type i membrane protein.
IMAGE:788363	SERF1A	Small EDRK-rich factor 1A (telomeric)	Hs.32567	This gene is part of a 500 kb inverted duplication on chromosome 5q13. This duplicated region contains at least four genes and repetitive elements which make it prone to rearrangements and deletions. The repetitiveness and complexity of the sequence have also caused difficulty in determining the organization of this genomic region. The duplication region includes both a telomeric and a centromeri…
IMAGE:1416998	MTHFD2L	Hypothetical LOC541467	Hs.479954
IMAGE:285344	ALS2CR15	Amyotrophic lateral sclerosis 2 (juvenile) chromosome region, candidate 14	Hs.516629
IMAGE:795208	NME5	Non-metastatic cells 5, protein expressed in (nucleoside-diphosphate kinase)	Hs.519602
IMAGE:79935			Data not found
IMAGE:290275	ATP8A1	ATPase, aminophospholipid transporter (APLT), Class I, type 8A, member 1	Hs.435052	The P-type adenosinetriphosphatases (P-type ATPases) are a family of proteins which use the free energy of ATP hydrolysis to drive uphill transport of ions across membranes. Several subfamilies of P-type ATPases have been identified. One subfamily catalyzes transport of heavy metal ions. Another subfamily transports non-heavy metal ions (NMHI). The protein encoded by this gene is a member of the …	integral membrane protein. chromaffin granules (by similarity).
IMAGE:362795	ISL1	ISL1 transcription factor, LIM/homeodomain, (islet-1)	Hs.505	ISL1 encodes islet 1, a transcription factor containing two amino-terminal LIM domains and one carboxy-terminal homeodomain. ISL1 plays an important role in the embryogenesis of pancreatic islets of Langerhans. In addition, mouse embryos made deficient in ISL1 fail to undergo neural tube motor neuron differentiation.
IMAGE:647437	SPOCK3	Sparc/osteonectin, cwcv and kazal-like domains proteoglycan (testican) 3	Hs.481133	Proteoglycans, which consist of a core protein and covalently linked glycosaminoglycans, are components of the extracellular matrix. SPOCK3 encodes a member of a novel Ca(2+)-binding proteoglycan family.[supplied by OMIM]
IMAGE:430007	TMEM5	Transmembrane protein 5	Hs.216386
IMAGE:731073	NAT5	N-acetyltransferase 5 (ARD1 homolog, S. cerevisiae)	Hs.368783
IMAGE:1472638	RABL5	RAB, member RAS oncogene family-like 5	Hs.389104
IMAGE:130610	TMEM4	Transmembrane protein 4	Hs.8752
IMAGE:197727	PEMT	Phosphatidylethanolamine N-methyltransferase	Hs.287717	This gene encodes an enzyme which converts phosphatidylethanolamine to phosphatidylcholine by sequential methylation in the liver. The protein localizes to the endoplasmic reticulum and mitochondria-associated membranes. The gene is within the Smith-Magenis syndrome region on chromosome 17. Alternate splicing of this gene results in three transcript variants encoding two different isoforms.
1049033	CLGN	Calmegin	Hs.86368	Calmegin is a testis-specific endoplasmic reticulum chaperone protein. CLGN may play a role in spermatogeneisis and infertility.	type i membrane protein. endoplasmic reticulum.
IMAGE:81518	OCRL	Oculocerebrorenal syndrome of Lowe	Hs.126357	This gene encodes a phosphatase enzyme that is involved in actin polymerization and is found in the trans-Golgi network. Mutations in this gene cause oculocerebrorenal syndrome of Lowe and also Dent disease.
IMAGE:783849	GCH1	GTP cyclohydrolase 1 (dopa-responsive dystonia)	Hs.86724	This gene encodes a member of the GTP cyclohydrolase I family. The encoded protein is the first and rate-limiting enzyme in tetrahydrobiopterin (BH4) biosynthesis, catalyzing the conversion of GTP into 7,8-dihydroneopterin triphosphate. BH4 is an essential cofactor required by aromatic amino acid hydroxylases as well as nitric oxide synthases. Mutations in this gene are associated with malignant …
IMAGE:85690	SERPIND1	Serine (or cysteine) proteinase inhibitor, clade D (heparin cofactor), member 1	Hs.474270	The product encoded by this gene is a serine proteinase inhibitor which rapidly inhibits thrombin in the presence of dermatan sulfate or heparin. The gene contains five exons and four introns. This protein shares homology with antithrombin III and other members of the alpha 1-antitrypsin superfamily. Mutations in this gene are associated with heparin cofactor II deficiency.
IMAGE:212188	APOH	Apolipoprotein H (beta-2-glycoprotein I)	Hs.445358	Apolipoprotein H has been implicated in a variety of physiologic pathways including lipoprotein metabolism, coagulation, and the production of antiphospholipid autoantibodies. APOH may be a required cofactor for anionic phospholipid binding by the antiphospholipid autoantibodies found in sera of many patients with lupus and primary antiphospholipid syndrome, but it does not seem to be required fo…	secreted.
IMAGE:1469138			Data not found
IMAGE:241788	FGB	Fibrinogen, B beta polypeptide	Hs.300774	The protein encoded by this gene is the beta component of fibrinogen, a blood-borne glycoprotein comprised of three pairs of nonidentical polypeptide chains. Following vascular injury, fibrinogen is cleaved by thrombin to form fibrin which is the most abundant component of blood clots. In addition, various cleavage products of fibrinogen and fibrin regulate cell adhesion and spreading, display va…
IMAGE:84713	FGB	Fibrinogen, B beta polypeptide	Hs.300774	The protein encoded by this gene is the beta component of fibrinogen, a blood-borne glycoprotein comprised of three pairs of nonidentical polypeptide chains. Following vascular injury, fibrinogen is cleaved by thrombin to form fibrin which is the most abundant component of blood clots. In addition, various cleavage products of fibrinogen and fibrin regulate cell adhesion and spreading, display va…
IMAGE:2018758	PEX7	Peroxisomal biogenesis factor 7	Hs.280932		peroxisomal and cytoplasmic.
IMAGE:2019116	SOX3	SRY (sex determining region Y)-box 3	Hs.157429	This gene encodes a member of the SOX (SRY-related HMG-box) family of transcription factors involved in the regulation of embryonic development and in the determination of the cell fate. The encoded protein may act as a transcriptional regulator after forming a protein complex with other proteins. Mutations in this gene have been associated with X-linked mental retardation with growth hormone def…	nuclear.
IMAGE:1573778	C11orf13	Chromosome 11 open reading frame 13	Hs.72925
IMAGE:210789	AGT	Angiotensinogen (serine (or cysteine) proteinase inhibitor, clade A (alpha-1 antiproteinase, antitrypsin), member 8)	Hs.19383	The protein encoded by this gene, pre-angiotensinogen or angiotensinogen precursor, is expressed in the liver and is cleaved by the enzyme renin in response to lowered blood pressure. The resulting product, angiotensin I is then cleaved by angiotensin converting enzyme (ACE) to generate the physiologically active enzyme angiotensin II. The protein is involved in maintaining blood pressure and in …	secreted.
IMAGE:2019101	AGT	Angiotensinogen (serine (or cysteine) proteinase inhibitor, clade A (alpha-1 antiproteinase, antitrypsin), member 8)	Hs.19383	The protein encoded by this gene, pre-angiotensinogen or angiotensinogen precursor, is expressed in the liver and is cleaved by the enzyme renin in response to lowered blood pressure. The resulting product, angiotensin I is then cleaved by angiotensin converting enzyme (ACE) to generate the physiologically active enzyme angiotensin II. The protein is involved in maintaining blood pressure and in …	secreted.
IMAGE:2028725			Data not found
IMAGE:2028135	BICD1	Bicaudal D homolog 1 (Drosophila)	Hs.505202	This gene is one of two human homologs of Drosophila bicaudal-D. It has been implicated in COPI-independent membrane transport from the Golgi apparatus to the endoplasmic reticulum. Two alternative splice variants have been described. Other alternative splice variants that encode different protein isoforms have been described but their full-length nature has not been determined.
IMAGE:813256	ABCB1	ATP-binding cassette, sub-family B (MDR/TAP), member 1	Hs.489033	The membrane-associated protein encoded by this gene is a member of the superfamily of ATP-binding cassette (ABC) transporters. ABC proteins transport various molecules across extra- and intra-cellular membranes. ABC genes are divided into seven distinct subfamilies (ABC1, MDR/TAP, MRP, ALD, OABP, GCN20, White). This protein is a member of the MDR/TAP subfamily. Members of the MDR/TAP subfamily a…	integral membrane protein.
IMAGE:2043418	C1QL1	Complement component 1, q subcomponent-like 1	Hs.134012
IMAGE:79817	WDR7	WD repeat domain 7	Hs.465213	This gene encodes a member of the WD repeat protein family. WD repeats are minimally conserved regions of approximately 40 amino acids typically bracketed by gly-his and trp-asp (GH-WD), which may facilitate formation of heterotrimeric or multiprotein complexes. Members of this family are involved in a variety of cellular processes, including cell cycle progression, signal transduction, apoptosis…
IMAGE:565249	LRP11	Low density lipoprotein receptor-related protein 11	Hs.408355
IMAGE:322123	TTC8	Tetratricopeptide repeat domain 8	Hs.303055	This gene encodes a protein that has been directly linked to Bardet-Biedl syndrome. The primary features of this syndrome include retinal dystrophy, obesity, polydactyly, renal abnormalities and learning disabilities. Experimentation in non-human eukaryotes suggests that this gene is expressed in ciliated cells and that it is involved in the formation of cilia. Alternate transcriptional splice va…
IMAGE:810970	RCBTB1	Regulator of chromosome condensation (RCC1) and BTB (POZ) domain containing protein 1	Hs.508021	This gene encodes a protein with an N-terminal RCC1 domain and a C-terminal BTB (broad complex, tramtrack and bric-a-brac) domain. In rat, over-expression of this gene in vascular smooth muscle cells induced cellular hypertrophy. In rat, the C-terminus of RCBTB1 interacts with the angiotensin II receptor-1A. In humans, this gene maps to a region of chromosome 13q that is frequently deleted in B-c…
IMAGE:300482	FUBP3	Far upstream element (FUSE) binding protein 3	Hs.98751
IMAGE:810008	DZIP3	Zinc finger DAZ interacting protein 3	Hs.409210
IMAGE:230560	LOC253012	Hypothetical protein LOC253012	Hs.443169
IMAGE:840384	GRSF1	G-rich RNA sequence binding factor 1	Hs.309763	The protein encoded by this gene is a cellular protein that binds RNAs containing the G-rich element. Using indirect immunofluorescence microscopy this protein was found to be localized in the cytoplasm. Several alternatively spliced transcript variants of this gene have been described, but the full-length nature of some of these variants has not been determined.	cytoplasmic.
IMAGE:23776	QDPR	Quinoid dihydropteridine reductase	Hs.75438	This gene encodes the enzyme dihydropteridine reductase, which catalyzes the NADH-mediated reduction of quinonoid dihydrobiopterin. This enzyme is an essential component of the pterin-dependent aromatic amino acid hydroxylating systems. Mutations in this gene resulting in QDPR deficiency include aberrant splicing, amino acid substitutions, insertions, or premature terminations. Dihydropteridine r…
IMAGE:38781	ATP9B	ATPase, Class II, type 9B	Hs.465475		integral membrane protein.
IMAGE:49937	SEZ6L	Seizure related 6 homolog (mouse)-like	Hs.194766
IMAGE:359933	GNAS	GNAS complex locus	Hs.125898	This gene has a highly complex imprinted expression pattern. It encodes maternally, paternally, and biallelically expressed proteins which are derived from alternatively spliced transcripts with alternate 5' exons. Each of the upstream exons is within a differentially methylated region, commonly found in imprinted genes. However, the close proximity (14 kb) of two oppositely expressed promoter re…
IMAGE:758329	WRB	Tryptophan rich basic protein	Hs.198308	This gene encodes a basic nuclear protein of unknown function. The gene is widely expressed in adult and fetal tissues. Since the region proposed to contain the gene(s) for congenital heart disease (CHD) in Down syndrome (DS) patients has been restricted to 21q22.2-22.3, this gene, which maps to 21q22.3, has a potential role in the pathogenesis of Down syndrom congenital heart disease.	nuclear.
IMAGE:843211	C6orf153	Chromosome 6 open reading frame 153	Hs.309231
IMAGE:324620	MGC13159	Hypothetical protein MGC13159	Hs.12845
IMAGE:1684594	DHX35	DEAH (Asp-Glu-Ala-His) box polypeptide 35	Hs.444520	DEAD box proteins characterized by the conserved motif Asp-Glu-Ala-Asp (DEAD), are putative RNA helicases. They are implicated in a number of cellular processes involving alteration of RNA secondary structure such as translation initiation, nuclear and mitochondrial splicing, and ribosome and spliceosome assembly. Based on their distribution patterns, some members of the DEAD box protein family a…
IMAGE:462419	FLJ20859	FLJ20859 gene	Hs.512693
IMAGE:669471	LOC157567	Hypothetical protein LOC157567	Hs.530199
IMAGE:1939113	SPIN3	Spindlin family, member 3	Hs.522672
IMAGE:1584752			Data not found
IMAGE:813275	DNAJC6	DnaJ (Hsp40) homolog, subfamily C, member 6	Hs.536063	DNAJC6 belongs to the evolutionarily conserved DNAJ/HSP40 family of proteins, which regulate molecular chaperone activity by stimulating ATPase activity. DNAJ proteins may have up to 3 distinct domains: a conserved 70-amino acid J domain, usually at the N terminus, a glycine/phenylalanine (G/F)-rich region, and a cysteine-rich domain containing 4 motifs resembling a zinc-finger domain (Ohtsuka an…
IMAGE:376789	LOC201164	Similar to CG12314 gene product	Hs.31652
IMAGE:52960	WBSCR16	Williams-Beuren syndrome chromosome region 16	Hs.520955	This gene encodes an RCC1-like G-exchanging factor. It is deleted in Williams syndrome, a multisystem developmental disorder caused by the deletion of contiguous genes at 7q11.23. Alternative splicing of this gene generates 2 transcript variants encoding different isoforms.
IMAGE:840974	TBC1D13	TBC1 domain family, member 13	Hs.3376
IMAGE:280776	MGC5139	Hypothetical protein MGC5139	Hs.127610
IMAGE:788273			In multiple clusters
IMAGE:826974	NCOA5	Nuclear receptor coactivator 5	Hs.25669	This gene encodes a coregulator for the alpha and beta estrogen receptors and the orphan nuclear receptor NR1D2. The protein localizes to the nucleus, and is thought to have both coactivator and corepressor functions. Its interaction with nuclear receptors is independent of the AF2 domain on the receptors, which is known to regulate interaction with other coreceptors. Two alternatively spliced tr…
IMAGE:234999	ZCCHC3	Zinc finger, CCHC domain containing 3	Hs.28608
IMAGE:781151	KIAA0999	KIAA0999 protein	Hs.167451
IMAGE:561851	DKFZP564O0823	DKFZP564O0823 protein	Hs.105460
IMAGE:951327	TMED8	Transmembrane emp24 domain containing 8	Hs.547416
IMAGE:455025	CGRRF1	Cell growth regulator with ring finger domain 1	Hs.59106
IMAGE:1750916	CGRRF1	Cell growth regulator with ring finger domain 1	Hs.59106
IMAGE:122160	CGRRF1	Cell growth regulator with ring finger domain 1	Hs.59106
IMAGE:132857	STAT5B	Signal transducer and activator of transcription 5B	Hs.132864	The protein encoded by this gene is a member of the STAT family of transcription factors. In response to cytokines and growth factors, STAT family members are phosphorylated by the receptor associated kinases, and then form homo- or heterodimers that translocate to the cell nucleus where they act as transcription activators. This protein mediates the signal transduction triggered by various cell …	cytoplasmic; translocated into the nucleus in response to phosphorylation (by similarity).
IMAGE:840766	TBL1X	Transducin (beta)-like 1X-linked	Hs.495656	The protein encoded by this gene has sequence similarity with members of the WD40 repeat-containing protein family. The WD40 group is a large family of proteins, which appear to have a regulatory function. It is believed that the WD40 repeats mediate protein-protein interactions and members of the family are involved in signal transduction, RNA processing, gene regulation, vesicular trafficking, …	nuclear (probable).
IMAGE:504279	TBL1X	Transducin (beta)-like 1X-linked	Hs.495656	The protein encoded by this gene has sequence similarity with members of the WD40 repeat-containing protein family. The WD40 group is a large family of proteins, which appear to have a regulatory function. It is believed that the WD40 repeats mediate protein-protein interactions and members of the family are involved in signal transduction, RNA processing, gene regulation, vesicular trafficking, …	nuclear (probable).
IMAGE:877664			In multiple clusters
IMAGE:824552	CD99L2	CD99 antigen-like 2	Hs.522805
IMAGE:184022	APBB1	Amyloid beta (A4) precursor protein-binding, family B, member 1 (Fe65)	Hs.372840	The protein encoded by this gene is a member of the Fe65 protein family. It is an adaptor protein localized in the nucleus. It interacts with the Alzheimer's disease amyloid precursor protein (APP), transcription factor CP2/LSF/LBP1 and the low-density lipoprotein receptor-related protein. APP functions as a cytosolic anchoring site that can prevent the gene product's nuclear translocation. This …
IMAGE:47255	EVC	Ellis van Creveld syndrome	Hs.552571	This gene encodes a protein containing a leucine zipper and a transmembrane domain. This gene has been implicated in both Ellis-van Creveld syndrome (EvC) and Weyers acrodental dysostosis. Two transcript variants encoding the same protein have been identified for this gene.
IMAGE:1942651	TEX12	Testis expressed sequence 12	Hs.524039	This gene is similar to a mouse gene that is expressed in the testis.
IMAGE:1946107	LPPR2	Lipid phosphate phosphatase-related protein type 2	Hs.6846
IMAGE:399440	LOC56920	Semaphorin sem2	Hs.59729
IMAGE:414992	KLP1	K562 cell-derived leucine-zipper-like protein 1	Hs.31854
IMAGE:29703	NPHP4	Nephronophthisis 4	Hs.462348	This gene encodes a protein which contains a proline-rich region. The encoded protein may function in renal tubular development and function. This protein interacts with nephrocystin. Mutations in this gene are associated with nephronophthisis type 4. Multiple alternative transcript variants have been described but their full-length nature has not been determined.
IMAGE:302632	B7	B7 gene	Hs.155586
IMAGE:2067500	LDB3	LIM domain binding 3	Hs.49998
IMAGE:324342	ASAHL	N-acylsphingosine amidohydrolase (acid ceramidase)-like	Hs.437365		lysosomal (probable).
IMAGE:50492	GNAL	Guanine nucleotide binding protein (G protein), alpha activating activity polypeptide, olfactory type	Hs.136295
IMAGE:563444	GNAS	GNAS complex locus	Hs.125898	This gene has a highly complex imprinted expression pattern. It encodes maternally, paternally, and biallelically expressed proteins which are derived from alternatively spliced transcripts with alternate 5' exons. Each of the upstream exons is within a differentially methylated region, commonly found in imprinted genes. However, the close proximity (14 kb) of two oppositely expressed promoter re…
IMAGE:897590	GNAS	GNAS complex locus	Hs.125898	This gene has a highly complex imprinted expression pattern. It encodes maternally, paternally, and biallelically expressed proteins which are derived from alternatively spliced transcripts with alternate 5' exons. Each of the upstream exons is within a differentially methylated region, commonly found in imprinted genes. However, the close proximity (14 kb) of two oppositely expressed promoter re…
IMAGE:1570502	LOC149832	Hypothetical protein LOC149832	Hs.126857
IMAGE:34869	CPNE4	Copine IV	Hs.199877	Calcium-dependent membrane-binding proteins may regulate molecular events at the interface of the cell membrane and cytoplasm. This gene is one of several genes that encode a calcium-dependent protein containing two N-terminal type II C2 domains and an integrin A domain-like sequence in the C-terminus.
IMAGE:878231	BAT5	HLA-B associated transcript 5	Hs.388188	A cluster of genes, BAT1-BAT5, has been localized in the vicinity of the genes for TNF alpha and TNF beta. These genes are all within the human major histocompatibility complex class III region. The protein encoded by this gene is thought to be involved in some aspects of immunity.
IMAGE:2020862			Data not found
IMAGE:22895	INSM1	Insulinoma-associated 1	Hs.89584	Insulinoma-associated 1 (INSM1) gene is intronless and encodes a protein containing both a zinc finger DNA-binding domain and a putative prohormone domain. This gene is a sensitive marker for neuroendocrine differentiation of human lung tumors.	nuclear (potential).
IMAGE:77193	MAFB	V-maf musculoaponeurotic fibrosarcoma oncogene homolog B (avian)	Hs.169487	The protein encoded by this gene is a basic leucine zipper (bZIP) transcription factor that plays an important role in the regulation of lineage-specific hematopoiesis. The encoded nuclear protein represses ETS1-mediated transcription of erythroid-specific genes in myeloid cells. This gene contains no introns.	nuclear (by similarity).
IMAGE:321266	MAFB	V-maf musculoaponeurotic fibrosarcoma oncogene homolog B (avian)	Hs.169487	The protein encoded by this gene is a basic leucine zipper (bZIP) transcription factor that plays an important role in the regulation of lineage-specific hematopoiesis. The encoded nuclear protein represses ETS1-mediated transcription of erythroid-specific genes in myeloid cells. This gene contains no introns.	nuclear (by similarity).
IMAGE:41684	HLF	Hepatic leukemia factor	Hs.196952		nuclear (probable).
IMAGE:2018332	PRKAR1A	Protein kinase, cAMP-dependent, regulatory, type I, alpha (tissue specific extinguisher 1)	Hs.280342	cAMP is a signaling molecule important for a variety of cellular functions. cAMP exerts its effects by activating the cAMP-dependent protein kinase (AMPK), which transduces the signal through phosphorylation of different target proteins. The inactive holoenzyme of AMPK is a tetramer composed of two regulatory and two catalytic subunits. cAMP causes the dissociation of the inactive holoenzyme into…
IMAGE:812289	PRKAR1A	Protein kinase, cAMP-dependent, regulatory, type I, alpha (tissue specific extinguisher 1)	Hs.280342	cAMP is a signaling molecule important for a variety of cellular functions. cAMP exerts its effects by activating the cAMP-dependent protein kinase (AMPK), which transduces the signal through phosphorylation of different target proteins. The inactive holoenzyme of AMPK is a tetramer composed of two regulatory and two catalytic subunits. cAMP causes the dissociation of the inactive holoenzyme into…
IMAGE:547945	LIG4	Ligase IV, DNA, ATP-dependent	Hs.166091	The protein encoded by this gene is a DNA ligase that joins single-strand breaks in a double-stranded polydeoxynucleotide in an ATP-dependent reaction. This protein is essential for V(D)J recombination and DNA double-strand break (DSB) repair through nonhomologous end joining (NHEJ). This protein forms a complex with the X-ray repair cross complementing protein 4 (XRCC4), and further interacts wi…	nuclear.
IMAGE:841689			Data not found
IMAGE:1687505			Data not found
IMAGE:841220		Transcribed locus, moderately similar to NP_005496.3 scavenger receptor class B, member 1; CD36 antigen-like 1; CD36 antigen (collagen type I receptor, thrombospondin receptor)-like 1; scavenger receptor class B type 1; scavenger receptor class B type III [Homo sapiens]	Hs.525015
IMAGE:210919		Transcribed locus, strongly similar to NP_060011.1 crystallin, gamma S; crystallin, gamma 8 [Homo sapiens]	Hs.497253
IMAGE:108801	C14orf101	Chromosome 14 open reading frame 101	Hs.549170
IMAGE:196012	GLS	Glutaminase	Hs.116448	Sahai (1983) demonstrated phosphate-activated glutaminase (EC 3.5.1.2) in human platelets. It is the major enzyme yielding glutamate from glutamine. Significance of the enzyme derives from its possible implication in behavior disturbances in which glutamate acts as a neurotransmitter (Prusiner, 1981). High heritability of platelet glutaminase was indicated by studies of Sahai and Vogel (1983) who…
IMAGE:346027	GLS	Glutaminase	Hs.116448	Sahai (1983) demonstrated phosphate-activated glutaminase (EC 3.5.1.2) in human platelets. It is the major enzyme yielding glutamate from glutamine. Significance of the enzyme derives from its possible implication in behavior disturbances in which glutamate acts as a neurotransmitter (Prusiner, 1981). High heritability of platelet glutaminase was indicated by studies of Sahai and Vogel (1983) who…
IMAGE:417495			Data not found
IMAGE:417473	GNAS	GNAS complex locus	Hs.125898	This gene has a highly complex imprinted expression pattern. It encodes maternally, paternally, and biallelically expressed proteins which are derived from alternatively spliced transcripts with alternate 5' exons. Each of the upstream exons is within a differentially methylated region, commonly found in imprinted genes. However, the close proximity (14 kb) of two oppositely expressed promoter re…
IMAGE:1911721	GNAS	GNAS complex locus	Hs.125898	This gene has a highly complex imprinted expression pattern. It encodes maternally, paternally, and biallelically expressed proteins which are derived from alternatively spliced transcripts with alternate 5' exons. Each of the upstream exons is within a differentially methylated region, commonly found in imprinted genes. However, the close proximity (14 kb) of two oppositely expressed promoter re…
IMAGE:213871	GNAS	GNAS complex locus	Hs.125898	This gene has a highly complex imprinted expression pattern. It encodes maternally, paternally, and biallelically expressed proteins which are derived from alternatively spliced transcripts with alternate 5' exons. Each of the upstream exons is within a differentially methylated region, commonly found in imprinted genes. However, the close proximity (14 kb) of two oppositely expressed promoter re…
IMAGE:197676	RIPX	Rap2 interacting protein x	Hs.7972
IMAGE:143310	RIPX	Rap2 interacting protein x	Hs.7972
IMAGE:1683293		Hypothetical LOC388397	Hs.528473
IMAGE:282956	TRIM21	Tripartite motif-containing 21	Hs.532357	The protein encoded by this gene is a member of the tripartite motif (TRIM) family. The TRIM motif includes three zinc-binding domains, a RING, a B-box type 1 and a B-box type 2, and a coiled-coil region. This protein is part of the RoSSA ribonucleoprotein which includes a single polypeptide and one of four small RNA molecules. The RoSSA particle localizes to both the cytoplasm and the nucleus. R…
IMAGE:174627	SCG2	Secretogranin II (chromogranin C)	Hs.516726	The protein encoded by this gene is a member of the chromogranin/secretogranin family of neuroendocrine secretory proteins. Studies in rodents suggest that the full length protein, secretogranin II, is involved in the packaging or sorting of peptide hormones and neuropeptides into secretory vesicles. The full length protein is cleaved to produce the active peptide secretoneurin, which exerts chem…	neuroendocrine and endocrine secretory granules.
IMAGE:362973		Homo sapiens, clone IMAGE:5296173, mRNA	Hs.221513
IMAGE:40695	NAPB	N-ethylmaleimide-sensitive factor attachment protein, beta	Hs.269471		cytoplasmic peripheral membrane protein (by similarity).
IMAGE:753361		Similar to RUN and FYVE domain-containing 2; Run- and FYVE-domain containing protein	Hs.518801
IMAGE:840658	PTOV1	Prostate tumor overexpressed gene 1	Hs.515540
IMAGE:841663	NARF	Nuclear prelamin A recognition factor	Hs.256526	Several proteins have been found to be prenylated and methylated at their carboxyl-terminal ends. Prenylation was initially believed to be important only for membrane attachment. However, another role for prenylation appears to be its importance in protein-protein interactions. The only nuclear proteins known to be prenylated in mammalian cells are prelamin A- and B-type lamins. Prelamin A is far…
IMAGE:137506			Data not found
IMAGE:756452	TYK2	Tyrosine kinase 2	Hs.75516
IMAGE:813585	C20orf18	Chromosome 20 open reading frame 18	Hs.247280	The protein encoded by this gene is similar to mouse UIP28/UbcM4 interacting protein at the amino acid level. The function of this protein is unknown. This gene contains at least 12 exons. Several alternatively spliced transcript variants have been described, but the full length nature of some of them has not been determined.
IMAGE:530958	SMO	Smoothened homolog (Drosophila)	Hs.437846		integral membrane protein.
IMAGE:811138			In multiple clusters
IMAGE:773381	NAPA	N-ethylmaleimide-sensitive factor attachment protein, alpha	Hs.126938	The 'SNARE hypothesis' is a model explaining the process of docking and fusion of vesicles to their target membranes. According to this model, membrane proteins from the vesicle (v-SNAREs) and proteins from the target membrane (t-SNAREs) govern the specificity of vesicle targeting and docking through mutual recognition. Once the 2 classes of SNAREs bind to each other, they form a complex that rec…	cytoplasmic peripheral membrane protein.
IMAGE:1492356	SCAMP4	Hypothetical protein BC011824	Hs.144980
IMAGE:140354	SCAMP4	Hypothetical protein BC011824	Hs.144980
IMAGE:730439	SLC25A29	Solute carrier family 25, member 29	Hs.497598
IMAGE:49318	AXL	AXL receptor tyrosine kinase	Hs.466791	The protein encoded by this gene is a member of the receptor tyrosine kinase subfamily. Although it is similar to other receptor tyrosine kinases, the Axl protein represents a unique structure of the extracellular region that juxtaposes IgL and FNIII repeats. It transduce signals from the extracellular matrix into the cytoplasm by binding growth factors like vitamin K-dependent protein growth-arr…	type i membrane protein.
IMAGE:767268	DPP7	Dipeptidylpeptidase 7	Hs.37916	The protein encoded by this gene is a post-proline cleaving aminopeptidase expressed in quiescent lymphocytes. The resting lymphocytes are maintained through suppression of apoptosis, a state which is disrupted by inhibition of this novel serine protease. The enzyme has strong sequence homology with prolylcarboxypeptidase and is active at both acidic and neutral pH.
IMAGE:1868572	DPP7	Dipeptidylpeptidase 7	Hs.37916	The protein encoded by this gene is a post-proline cleaving aminopeptidase expressed in quiescent lymphocytes. The resting lymphocytes are maintained through suppression of apoptosis, a state which is disrupted by inhibition of this novel serine protease. The enzyme has strong sequence homology with prolylcarboxypeptidase and is active at both acidic and neutral pH.
IMAGE:784260	MAN1B1	Mannosidase, alpha, class 1B, member 1	Hs.279881
IMAGE:247089	SSBP4	Single stranded DNA binding protein 4	Hs.515259
IMAGE:133930			In multiple clusters
IMAGE:491237		Transcribed locus, weakly similar to XP_496299.1 PREDICTED: hypothetical protein LOC148206 [Homo sapiens]	Hs.145500
IMAGE:297919			Data not found
IMAGE:144801	CALM1	Calmodulin 1 (phosphorylase kinase, delta)	Hs.282410	Calmodulin is the archetype of the family of calcium-modulated proteins of which nearly 20 members have been found. They are identified by their occurrence in the cytosol or on membranes facing the cytosol and by a high affinity for calcium. Calmodulin contains 149 amino acids and has 4 calcium-binding domains. Its functions include roles in growth and the cell cycle as well as in signal transduc…
IMAGE:291363	GRLF1	Glucocorticoid receptor DNA binding factor 1	Hs.509447	The human glucocorticoid receptor DNA binding factor, which associates with the promoter region of the glucocorticoid receptor gene (hGR gene), is a repressor of glucocorticoid receptor transcription. The amino acid sequence deduced from the cDNA sequences show the presence of three sequence motifs characteristic of a zinc finger and one motif suggestive of a leucine zipper in which 1 cysteine is…
IMAGE:42793	OGDHL	Oxoglutarate dehydrogenase-like	Hs.17860
IMAGE:770377	ATP6V0A1	ATPase, H+ transporting, lysosomal V0 subunit a isoform 1	Hs.463074	This gene encodes a component of vacuolar ATPase (V-ATPase), a multisubunit enzyme that mediates acidification of eukaryotic intracellular organelles. V-ATPase dependent organelle acidification is necessary for such intracellular processes as protein sorting, zymogen activation, receptor-mediated endocytosis, and synaptic vesicle proton gradient generation. V-ATPase is composed of a cytosolic V1 …	integral membrane protein. coated vesicle.
IMAGE:50250		CDNA FLJ45905 fis, clone OCBBF3026576	Hs.438858
IMAGE:448027	STXBP1	Syntaxin binding protein 1	Hs.288229
IMAGE:52430	SALL2	Sal-like 2 (Drosophila)	Hs.416358		nuclear (probable).
IMAGE:128668			In multiple clusters
IMAGE:767462			In multiple clusters
IMAGE:796468	CEAL1	Carcinoembryonic antigen-like 1	Hs.416925
IMAGE:811836	TSPYL4	TSPY-like 4	Hs.284141
IMAGE:757173	NDFIP1	Nedd4 family interacting protein 1	Hs.9788	The protein encoded by this gene belongs to a small group of evolutionarily conserved proteins with three transmembrane domains. It is a potential target for ubiquitination by the Nedd4 family of proteins. This protein is thought to be part of a family of integral Golgi membrane proteins.
IMAGE:1636714	MKKS	McKusick-Kaufman syndrome	Hs.472119	This gene encodes a protein with sequence similarity to the chaperonin family. The encoded protein may have a role in protein processing in limb, cardiac and reproductive system development. Mutations in this gene have been observed in patients with Bardet-Biedl syndrome type 6 and McKusick-Kaufman syndrome. Two transcript variants encoding the same protein have been identified for this gene.
IMAGE:782677	CROP	Cisplatin resistance-associated overexpressed protein	Hs.534387	This gene encodes a cisplatin resistance-associated overexpressed protein (CROP). The N-terminal half of the CROP contains cysteine/histidine motifs and leucine zipper-like repeats, and the C-terminal half is rich in arginine and glutamate residues (RE domain) and arginine and serine residues (RS domain). This protein localizes with a speckled pattern in the nucleus, and could be involved in the …
IMAGE:365955	ZNF594	Zinc finger protein 594	Hs.458408
IMAGE:1569418	FLJ40142	FLJ40142 protein	Hs.44817
IMAGE:743195	KIAA1799	KIAA1799 protein	Hs.269768
IMAGE:277707	LOC137392	Similar to CG6405 gene product	Hs.125038
IMAGE:22716	MIS12	MIS12 homolog (yeast)	Hs.267194
IMAGE:755777	MIS12	MIS12 homolog (yeast)	Hs.267194
IMAGE:279171			In multiple clusters
IMAGE:504859		Transcribed locus	Hs.547852

## Sheet: 2. SAM_Islet Tumor
Significant Genes List
Sam list of genes that are significantly positive or negative in the 6 islet tumor samples (4 patients) compared to normal pancreatic tissue and other non-islet cell tumors.
Input Parameters
	Imputation Engine			10-Nearest Neighbor Imputer
	Data Type			Two Class, unpaired data
	Data in log scale?			TRUE
	Number of Permutations			100
	Blocked Permutation?			FALSE
	RNG Seed			1234567
	(Delta, Fold Change)			(0.17713, 3.00000)
	(Upper Cutoff, Lower Cutoff)			(0.38757, -0.30917)
Computed Quantities
	Computed Exchangeability Factor S0			1.93705
	S0 percentile			1
	False Significant Number (Median, 90 percentile)			(6.99733, 24.12679)
	False Discovery Rate (Median, 90 percentile)			(3.49866, 12.06339)
	Pi0Hat			0.55979
106 Positive Significant Genes
	Row	Gene Name	Gene ID	Score(d)	Numerator(r)	Denominator(s+s0)	Fold Change	q-value (%)	Chromosome	Cytoband
	1046	C11orf13 || Chromosome 11 open reading frame 13 || Hs.72925 || AA970526 || 224359	IMAGE:1573778	2.7151	6.44384	2.37333	87.38943	0.47845	11	11p15.5
	1056	SCG2 || Secretogranin II (chromogranin C) || Hs.516726 || H27864 || 105163	IMAGE:174627	1.97809	4.85029	2.45201	27.43719	0.47845	2	2q35-q36
	1043	PCSK2 || Proprotein convertase subtilisin/kexin type 2 || Hs.315186 || R37959 || 111246	IMAGE:24254	1.96451	4.4347	2.2574	20.43742	0.47845	20	20p11.2
	1044	FGB || Fibrinogen, B beta polypeptide || Hs.300774 || T73858 || 120929	IMAGE:84713	1.86316	4.19257	2.25024	20.68502	0.47845	4	4q28
	1045	PEX7 || Peroxisomal biogenesis factor 7 || Hs.280932 || AI360264 || 309105	IMAGE:2018758	1.86145	4.34383	2.33357	34.63794	0.47845	6	6q21-q22.2
	1111	SERPINA1 || **Serine (or cysteine) proteinase inhibitor, clade A (alpha-1 antiproteinase, antitrypsin), member 1 || Hs.525557 || N71049 || 113436	IMAGE:294578	1.64035	4.16297	2.53785	12.44570	0.47845	14	14q32.1
	1066	QPCT || Glutaminyl-peptide cyclotransferase (glutaminyl cyclase) || Hs.79033 || AA282134 || 114397	IMAGE:711918	1.50693	3.58484	2.37891	13.61102	0.47845	2	2p22.2
	1087	|| || || AA670429 || 110839	IMAGE:878836	1.47689	3.74908	2.5385	10.50937	0.47845
	1112	|| || || R00822 || 106155	IMAGE:123561	1.43561	3.54508	2.46939	9.91105	0.47845
	1032	MAFB || V-maf musculoaponeurotic fibrosarcoma oncogene homolog B (avian) || Hs.169487 || T50121 || 119443	IMAGE:77193	1.42384	3.23117	2.26934	9.49304	0.47845		20q11.2-q13.1
	1058	DKFZP564O0823 || DKFZP564O0823 protein || Hs.105460 || AA086292 || 106632	IMAGE:561851	1.38041	3.23366	2.34253	8.94732	0.47845	4	4q13.3-q21.3
	1395	BEX1 || Brain expressed, X-linked 1 || Hs.334370 || W60581 || 106283	IMAGE:341706	1.36939	3.37062	2.46141	8.76016	0.47845	X	Xq21-q23
	1038	GNAS || GNAS complex locus || Hs.125898 || AA112659 || 112864	IMAGE:563444	1.31398	2.88229	2.19356	7.61156	0.47845	20	20q13.3
	1036	INSM1 || Insulinoma-associated 1 || Hs.89584 || R38640 || 115211	IMAGE:22895	1.28881	2.90941	2.25743	6.65359	0.47845	20	20p11.2
	1070	PTPRN2 || Protein tyrosine phosphatase, receptor type, N polypeptide 2 || Hs.490789 || AA464590 || 104107	IMAGE:812968	1.23958	2.923	2.35807	6.81293	0.47845	7	7q36
	1052	GNAS || GNAS complex locus || Hs.125898 || H72533 || 105940	IMAGE:213871	1.2156	2.66089	2.18895	6.49054	0.47845	20	20q13.3
	1057	SSA1 || Sjogren syndrome antigen A1 (52kDa, ribonucleoprotein autoantigen SS-A/Ro) || Hs.532357 || N45131 || 118676	IMAGE:282956	1.2149	2.78751	2.29443	6.92286	0.47845	11	11p15.5
	1073	HMX1 || Homeo box (H6 family) 1 || Hs.104134 || AI364148 || 307624	IMAGE:2017947	1.19079	2.74454	2.30481	7.38526	0.47845	4	4p16.1
	1090	ALDH1A1 || Aldehyde dehydrogenase 1 family, member A1 || Hs.76392 || AA664101 || 118798	IMAGE:855624	1.17752	2.86405	2.43228	6.41911	0.47845	9	9q21.13
	1083	TUSC3 || Tumor suppressor candidate 3 || Hs.426324 || AI049502 || 102808	IMAGE:1699281	1.16742	2.77939	2.3808	6.19048	0.47845
	303	ACSL1 || Acyl-CoA synthetase long-chain family member 1 || Hs.406678 || AI361530 || 307845	IMAGE:2014138	1.16533	2.66261	2.28485	6.14912	0.47845	4	4q34-q35
	1049	TTC8 || Tetratricopeptide repeat domain 8 || Hs.303055 || W37688 || 225597	IMAGE:322123	1.11955	2.43555	2.17548	5.70900	0.47845	14	14q31.3
	302	ACSL1 || Acyl-CoA synthetase long-chain family member 1 || Hs.406678 || T73556 || 116294	IMAGE:82734	1.11762	2.51588	2.2511	5.65101	0.47845	4	4q34-q35
	1102	AQP3 || Aquaporin 3 || Hs.234642 || R91904 || 120491	IMAGE:196005	1.11728	2.60275	2.32954	6.02469	0.47845	9	9p13
	1065	GNAI1 || Guanine nucleotide binding protein (G protein), alpha inhibiting activity polypeptide 1 || Hs.134587 || W46769 || 221953	IMAGE:324386	1.11647	2.43928	2.18481	5.39623	0.47845	7	7q21
	1062	PAM || Peptidylglycine alpha-amidating monooxygenase || Hs.369430 || R66309 || 114808	IMAGE:140806	1.1108	2.50708	2.257	6.45284	0.47845	5	5q14-q21
	1053	GNAS || GNAS complex locus || Hs.125898 || W88587 || 111610	IMAGE:417473	1.09193	2.47695	2.26842	5.84130	0.47845	20	20q13.3
	1041	QDPR || Quinoid dihydropteridine reductase || Hs.75438 || R38198 || 107403	IMAGE:23776	1.08161	2.32091	2.1458	5.59713	0.47845	4	4p15.31
	1088	TTR || Transthyretin (prealbumin, amyloidosis type I) || Hs.427202 || AI261783 || 319021	IMAGE:1868551	1.05705	2.72562	2.57852	5.07319	0.47845	18	18q12.1
	1069	TM4SF2 || Transmembrane 4 superfamily member 2 || Hs.441664 || N93505 || 114192	IMAGE:307471	1.05647	2.51149	2.37725	5.18253	0.47845	X	Xp11.4
	1109	ASS || Argininosuccinate synthetase || Hs.160786 || AA676466 || 110941	IMAGE:882522	1.04474	2.52033	2.4124	7.92816	0.47845	9	9q34.1
	1074	FKBP11 || FK506 binding protein 11, 19 kDa || Hs.438695 || N72137 || 108749	IMAGE:291097	1.04396	2.50074	2.39543	4.95419	0.47845	12	12q13
	1050	GLS || Glutaminase || Hs.116448 || W72090 || 225989	IMAGE:346027	1.03396	2.27853	2.20368	4.82212	0.47845	2	2q32-q34
	1094	|| || || T61475 || 106674	IMAGE:79935	1.02009	2.38424	2.33728	5.10812	0.47845	4	4p14-p12
	1034	NAT5 || N-acetyltransferase 5 (ARD1 homolog, S. cerevisiae) || Hs.368783 || AA421291 || 220119	IMAGE:731073	1.00939	2.21741	2.19678	4.64049	0.47845	20	20p11.23
	1060	KIAA1102 || **KIAA1102 protein || Hs.335163 || R23270 || 117937	IMAGE:131452	1.00848	2.24661	2.22771	4.39082	0.47845	4	4p13
	1110	ASS || Argininosuccinate synthetase || Hs.160786 || AA676405 || 308435	IMAGE:882461	1.00567	2.49076	2.47671	7.38875	0.47845	9	9q34.1
	1047	OCRL || Oculocerebrorenal syndrome of Lowe || Hs.126357 || T63362 || 100224	IMAGE:81518	1.00318	2.12358	2.11684	4.75478	0.47845	X	Xq25-q26.1
	1048	SEZ6L || Seizure related 6 homolog (mouse)-like || Hs.194766 || H29013 || 120744	IMAGE:49937	1.00164	2.13865	2.13514	4.78761	0.47845	22	22q12.1
	1086	|| || || AA757852 || 224263	IMAGE:395794	0.993097	2.42495	2.4418	4.44090	0.47845
	1025	TXNL5 || Thioredoxin-like 5 || Hs.408236 || AA284245 || 101982	IMAGE:325606	0.982166	2.21548	2.25571	4.57369	0.47845	17	17p13.2
	1035	SMARCA1 || SWI/SNF related, matrix associated, actin dependent regulator of chromatin, subfamily a, member 1 || Hs.152292 || AA496809 || 101117	IMAGE:897667	0.979712	2.16937	2.21429	6.27010	0.47845	X	Xq25
	1039	GNAS || GNAS complex locus || Hs.125898 || AA035620 || 109020	IMAGE:359933	0.956599	2.17942	2.2783	5.42887	0.47845	20	20q13.3
	1055	|| Transcribed locus || Hs.497253 || H69785 || 106427	IMAGE:210919	0.953328	2.07551	2.17712	4.23804	0.47845	14	14q23.1
	1015	TM4SF4 || Transmembrane 4 superfamily member 4 || Hs.133527 || H78244 || 109138	IMAGE:234559	0.953135	2.50061	2.62356	4.73995	0.47845	3	3q25
	1042	WDR7 || WD repeat domain 7 || Hs.465213 || AI820523 || 102483	IMAGE:79817	0.948779	2.02479	2.1341	4.18724	0.47845	18	18q21.1-q22
	296	|| || || R95691 || 106310	IMAGE:199367	0.945309	2.25461	2.38505	4.05867	0.47845
	1051	GLS || Glutaminase || Hs.116448 || R89349 || 225594	IMAGE:196012	0.931281	2.0212	2.17034	4.24533	0.47845	2	2q32-q34
	670	|| || || R88878 || 112361	IMAGE:166805	0.926215	2.24507	2.42392	4.35829	0.47845
	1271	|| || || || 248886	IMAGE:33267	0.919056	2.39908	2.61037	4.04873	0.47845
	1040	CD99L2 || CD99 antigen-like 2 || Hs.522805 || AA490911 || 101610	IMAGE:824552	0.916103	1.99874	2.18179	4.90998	0.47845	X	Xq28
	1163	|| *mitoch. cont. EST || || || 433309	*mitoch. cont. IMAGE:1161030	0.874557	2.22863	2.5483	4.75505	0.47845
	1082	TUSC3 || Tumor suppressor candidate 3 || Hs.426324 || AA678536 || 115456	IMAGE:1155481	0.870516	2.08452	2.39458	5.08314	0.47845
	1095	AXL || AXL receptor tyrosine kinase || Hs.466791 || H15336 || 109386	IMAGE:49318	0.870217	1.94308	2.23287	3.97223	0.47845	19	19q13.1
	1077	CLU || **Clusterin (complement lysis inhibitor, SP-40,40, sulfated glycoprotein 2, testosterone-repressed prostate message 2, apolipoprotein J) || Hs.436657 || AA292226 || 104956	IMAGE:725877	0.860433	2.20359	2.56103	3.68780	0.47845
	1063	LRP11 || Low density lipoprotein receptor-related protein 11 || Hs.408355 || AA136103 || 102498	IMAGE:565249	0.856969	1.90573	2.2238	3.86063	0.47845
	761	FBLN1 || Fibulin 1 || Hs.24601 || AA614680 || 115536	IMAGE:1129559	0.852459	2.05969	2.41618	3.95550	0.47845	22	22q13.31
	298	ATP6AP2 || **ATPase, H+ transporting, lysosomal accessory protein 2 || Hs.495960 || AA489232 || 224164	IMAGE:825076	0.848854	2.02034	2.38008	3.97083	0.47845
	1084	TUSC3 || Tumor suppressor candidate 3 || Hs.426324 || N95121 || 107031	IMAGE:293859	0.836816	1.96197	2.34456	3.87355	0.47845
	1068	GPX3 || Glutathione peroxidase 3 (plasma) || Hs.386793 || AA664180 || 108603	IMAGE:855523	0.835309	1.99022	2.38262	3.64011	0.47845	5	5q23
	1061	CALM1 || Calmodulin 1 (phosphorylase kinase, delta) || Hs.282410 || R76277 || 101104	IMAGE:144801	0.832997	1.80791	2.17036	3.42198	0.47845	14	14q24-q31
	1029	SAP18 || Sin3-associated polypeptide, 18kDa || Hs.524899 || H65595 || 108905	IMAGE:209756	0.828842	1.81428	2.18893	3.44231	0.47845	13	13q12.11
	1289	GARNL4 || GTPase activating Rap/RanGAP domain-like 4 || Hs.499659 || AI369713 || 319575	IMAGE:2017513	0.828159	1.98217	2.39347	3.45168	0.47845	17	17p13.3
	295	SERPINE2 || Serine (or cysteine) proteinase inhibitor, clade E (nexin, plasminogen activator inhibitor type 1), member 2 || Hs.38449 || N59721 || 115463	IMAGE:246722	0.816727	1.87441	2.29502	3.43085	0.47845	2	2q33-q35
	1150	PCP4 || Purkinje cell protein 4 || Hs.80296 || AA452826 || 117474	IMAGE:788566	0.815111	1.95087	2.39338	4.93397	0.47845	21	21q22.2
	1148	|| *mitoch. cont. ESTs, Moderately similar to ALUC_HUMAN !!!! ALU CLASS C WARNING ENTRY !!! [H.sapiens] || || || 433373	*mitoch. cont. IMAGE:916749	0.812308	1.85726	2.2864	3.59786	0.47845
	1059	FLJ10769 || Hypothetical protein FLJ10769 || Hs.408324 || AA443285 || 118561	IMAGE:784000	0.807955	1.75678	2.17435	3.40507	0.47845	13	13q34
	1064	GNAI1 || Guanine nucleotide binding protein (G protein), alpha inhibiting activity polypeptide 1 || Hs.134587 || AA406364 || 120135	IMAGE:753215	0.807392	1.78038	2.2051	3.68233	0.47845	7	7q21
	1144	|| *mitoch. cont. || || || 433322	*mitoch. cont. IMAGE:1590916	0.807277	1.87659	2.32459	3.60403	0.47845
	1096	SLC25A29 || Solute carrier family 25, member 29 || Hs.497598 || AA469975 || 99753	IMAGE:730439	0.807139	1.79983	2.22989	3.94918	0.47845	14	14q32.2
	1146	|| *mitoch. cont. ESTs || || || 433345	*mitoch. cont. IMAGE:502634	0.801102	1.87384	2.33908	3.44135	0.47845
	1142	|| *mitoch. cont. hypothetical protein DKFZp434G0920 || || || 433360	*mitoch. cont. IMAGE:770969	0.800785	1.87591	2.34259	3.75161	0.47845
	1291	|| CDNA clone IMAGE:5925561, partial cds || Hs.519138 || N89738 || 119020	IMAGE:301995	0.79713	2.06818	2.59454	3.08640	0.47845	4	4q35.1
	1033	LOC283578 || Hypothetical protein LOC283578 || Hs.200413 || AA620598 || 103366	IMAGE:951327	0.797033	1.73607	2.17816	3.49145	0.47845	14	14q24.3
	1284	PDK4 || Pyruvate dehydrogenase kinase, isoenzyme 4 || Hs.8364 || T61792 || 109284	IMAGE:78946	0.793322	2.13443	2.6905	3.54569	0.47845	7	7q21.3
	1031	RDH11 || DKFZP564M1462 protein || Hs.226007 || AA918370 || 223502	IMAGE:1535596	0.792547	1.75125	2.20964	3.44753	0.47845	14	14q24.1
	1103	RASD1 || RAS, dexamethasone-induced 1 || Hs.25829 || AI014398 || 307161	IMAGE:1635359	0.792319	1.84586	2.32969	3.78351	0.47845	17	17p11.2
	1145	|| *mitoch. cont. || || || 433319	*mitoch. cont. IMAGE:1574720	0.790532	1.8635	2.35727	3.43189	0.47845
	1099	FGA || Fibrinogen, A alpha polypeptide || Hs.351593 || AA011414 || 116021	IMAGE:429555	0.778149	1.71113	2.19898	3.32285	0.47845	4	4q28
	1100	DPP7 || Dipeptidylpeptidase 7 || Hs.37916 || AA418395 || 108216	IMAGE:767268	0.7722	1.72891	2.23894	3.51257	0.47845	9	9q34.3
	1141	|| *mitoch. cont. ESTs || || || 433356	*mitoch. cont. IMAGE:725914	0.770377	1.78211	2.31329	3.36338	0.47845
	1133	|| *mitoch. cont. || || || 433324	*mitoch. cont. IMAGE:1610469	0.768029	1.75637	2.28685	3.15016	0.47845
	1158	HMGB3 || High-mobility group box 3 || Hs.19114 || AA670197 || 221572	IMAGE:878640	0.760775	1.68921	2.22038	3.11438	0.47845	X	Xq28
	1292	|| || || H02525 || 119607	IMAGE:151240	0.760152	1.90222	2.50243	3.05138	0.47845	4	4q35.1
	533	CALD1 || Caldesmon 1 || Hs.490203 || H51958 || 110348	IMAGE:197450	0.759153	1.87963	2.47596	3.49648	0.47845	7	7q33
	1143	|| *mitoch. cont. || || || 433315	*mitoch. cont. IMAGE:1425266	0.749977	1.72467	2.29963	3.37661	0.47845
	1104	GLS || Glutaminase || Hs.116448 || AA919131 || 309483	IMAGE:1535070	0.747356	1.61914	2.1665	3.33209	0.47845	2	2q32-q34
	204	RNASE4 || Angiogenin, ribonuclease, RNase A family, 5 || Hs.283749 || AA682399 || 113576	IMAGE:461761	0.733146	1.72225	2.34912	4.78107	0.47845	14	14q11.1
	1080	NDFIP1 || Nedd4 family interacting protein 1 || Hs.9788 || AA496122 || 103502	IMAGE:757173	0.730181	1.58232	2.16702	3.11658	0.47845
	703	NNMT || Nicotinamide N-methyltransferase || Hs.503911 || T72089 || 115707	IMAGE:85840	0.729664	1.79539	2.46058	4.00521	0.47845	11	11q23.1
	54	UGT2B4 || UDP glycosyltransferase 2 family, polypeptide B4 || Hs.285887 || N73214 || 112087	IMAGE:246430	0.708803	1.73747	2.45128	6.59954	0.47845	4	4q13
	1067	|| || || AI147534 || 310380	IMAGE:1555659	0.687069	1.65228	2.40482	3.51871	0.47845	5	5q23
	1152	SEZ6L2 || Seizure related 6 homolog (mouse)-like 2 || Hs.6314 || AA482470 || 102710	IMAGE:752802	0.670301	1.51521	2.26049	3.07319	0.47845	16	16p11.2
	1054	C14orf101 || Chromosome 14 open reading frame 101 || Hs.134051 || T77893 || 106426	IMAGE:108801	0.668897	1.43895	2.15123	3.03684	0.47845	14	14q23.1
	56	CCL15 || Chemokine (C-C motif) ligand 14 || Hs.272493 || R96626 || 120495	IMAGE:199663	0.657187	1.4918	2.26998	3.34646	0.47845	17	17q11.2
	205	RNASE4 || Angiogenin, ribonuclease, RNase A family, 5 || Hs.283749 || AA888213 || 306966	IMAGE:1492276	0.629837	1.4407	2.28741	3.07259	0.47845	14	14q11.1
	1147	|| *mitoch. cont. hypothetical protein FLJ13511 || || || 433359	*mitoch. cont. IMAGE:770935	0.62482	1.47413	2.35929	3.22655	0.47845
	206	RNASE4 || Angiogenin, ribonuclease, RNase A family, 5 || Hs.283749 || T60163 || 111603	IMAGE:81417	0.619877	1.44896	2.3375	3.03050	0.47845	14	14q11.1
	1037	GNAS || GNAS complex locus || Hs.125898 || AA496835 || 307906	IMAGE:897590	0.60282	1.32307	2.1948	3.18852	0.823215	20	20q13.3
	62	SCAND1 || SCAN domain containing 1 || Hs.517008 || AA490594 || 318018	IMAGE:824108	0.594039	1.37376	2.31258	3.77742	0.823215	20	20q11.1-q11.23
	57	ADH1B || Alcohol dehydrogenase IB (class I), beta polypeptide || Hs.4 || N93428 || 100422	IMAGE:307231	0.583255	1.44953	2.48523	5.33708	0.823215	4	4q21-q23
	1108	HPS3 || Hermansky-Pudlak syndrome 3 || Hs.477898 || AA918982 || 220752	IMAGE:1536240	0.504766	1.25547	2.48723	4.05858	2.10672	3	3q23-q25
	65	|| Transcribed locus || Hs.530936 || W46341 || 106098	IMAGE:323806	0.489171	1.11187	2.27296	3.40030	2.35699	16	16q12.2
	63	ASGR1 || Asialoglycoprotein receptor 1 || Hs.12056 || H58255 || 112536	IMAGE:204541	0.47928	1.09638	2.28756	4.49553	2.35699	17	17p13.2
	704	CFH || Complement factor H || Hs.363396 || AA953249 || 307158	IMAGE:1592021	0.413736	0.997053	2.40988	3.16476	3.25128	1	1q32
	64	PLG || Plasminogen || Hs.143436 || T73090 || 102475	IMAGE:85979	0.387573	0.891595	2.30046	5.99297	3.49866	6	6q26
94 Negative Significant Genes
	Row	Gene Name	Gene ID	Score(d)	Numerator(r)	Denominator(s+s0)	Fold Change	q-value (%)	Chromosome	Cytoband
	1197	MMP7 || Matrix metalloproteinase 7 (matrilysin, uterine) || Hs.2256 || AA031513 || 113992	IMAGE:470393	-1.18973	-3.40988	2.86609	0.15749	0.47845	11	11q21-q22
	186	MUC1 || Mucin 1, transmembrane || Hs.89603 || AA486365 || 110473	IMAGE:840687	-1.0939	-2.87914	2.63199	0.14422	0.47845	1	1q21
	138	KRT7 || Keratin 7 || Hs.411501 || AA485959 || 99448	IMAGE:843321	-1.0008	-2.59045	2.58837	0.14469	0.47845	12	12q12-q13
	132	LGALS4 || Lectin, galactoside-binding, soluble, 4 (galectin 4) || Hs.5302 || AA130541 || 117859	IMAGE:586685	-0.975448	-2.68276	2.75029	0.22689	0.47845	19	19q13.2
	659	NQO1 || NAD(P)H dehydrogenase, quinone 1 || Hs.406515 || AA455538 || 104517	IMAGE:813387	-0.957856	-2.47664	2.58561	0.12532	0.47845	16	16q22.1
	1411	RNASE1 || Ribonuclease, RNase A family, 1 (pancreatic) || Hs.78224 || AA485893 || 119331	IMAGE:840493	-0.930264	-2.44049	2.62344	0.22257	0.47845	14	14q11.2
	695	HK2 || Hexokinase 2 || Hs.406266 || AI005515 || 220846	IMAGE:1637282	-0.885529	-2.16813	2.4484	0.20049	0.47845	2	2p13
	645	LGALS3 || Lectin, galactoside-binding, soluble, 3 (galectin 3) || Hs.531081 || AA630328 || 112326	IMAGE:855910	-0.861993	-2.10761	2.44504	0.20853	0.47845	14	14q21-q22
	1265	EVI1 || Ecotropic viral integration site 1 || Hs.165830 || AA043944 || 118195	IMAGE:486279	-0.85432	-2.00884	2.35139	0.22898	0.47845	3	3q24-q28
	663	RAI3 || Retinoic acid induced 3 || Hs.194691 || AA172400 || 110876	IMAGE:595037	-0.850561	-2.33524	2.74553	0.20264	0.47845		12p13-p12.3
	1373	DEFB1 || Defensin, beta 1 || Hs.32949 || AA946653 || 98742	IMAGE:1589138	-0.804129	-2.08014	2.58683	0.19032	0.47845	8	8p23.2-p23.1
	511	|| CDNA clone MGC:32677 IMAGE:4285958, complete cds || Hs.289044 || AA452145 || 116402	IMAGE:787851	-0.800436	-1.88014	2.3489	0.31142	0.47845
	1201	ENC1 || Ectodermal-neural cortex (with BTB-like domain) || Hs.104925 || H72122 || 101323	IMAGE:213651	-0.798797	-1.86646	2.33659	0.28758	0.47845	5	5q12-q13.3
	1374	CLDN10 || Claudin 10 || Hs.534377 || AA457739 || 112736	IMAGE:810761	-0.797155	-2.12805	2.66956	0.32575	0.47845	13	13q31-q34
	134	LGALS4 || Lectin, galactoside-binding, soluble, 4 (galectin 4) || Hs.5302 || AA100290 || 113631	IMAGE:511045	-0.793671	-2.13325	2.68783	0.22741	0.47845	19	19q13.2
	1251	CD24 || **CD24 antigen (small cell lung carcinoma cluster 4 antigen) || Hs.375108 || H59915 || 118216	IMAGE:204335	-0.792431	-2.01607	2.54416	0.32223	0.47845	Y	6q21
	1171	|| || || AA775616 || 111640	IMAGE:378461	-0.787025	-2.07219	2.63294	0.26719	0.47845	4	4q21-q25
	1408	P8 || P8 protein (candidate of metastasis 1) || Hs.513463 || T64469 || 106252	IMAGE:80484	-0.783841	-1.95266	2.49114	0.20463	0.47845	16	16p11.2
	824	SPOCK || Sparc/osteonectin, cwcv and kazal-like domains proteoglycan (testican) || Hs.124611 || AA436142 || 116081	IMAGE:754358	-0.771623	-1.89837	2.46023	0.25860	0.47845	5	5q31
	822	SOX4 || SRY (sex determining region Y)-box 4 || Hs.357901 || N23605 || 225012	IMAGE:250869	-0.754884	-1.72196	2.28109	0.30379	0.823215	6	6p22.3
	1481	CA12 || Carbonic anhydrase XII || Hs.210995 || AA171613 || 108855	IMAGE:594633	-0.749929	-1.87948	2.50621	0.22824	0.823215	15	15q22
	665	KRT19 || Keratin 19 || Hs.514167 || AA464250 || 102332	IMAGE:810131	-0.749137	-2.10132	2.80498	0.20944	0.823215	17	17q12-q21
	661	CTSE || Cathepsin E || Hs.1355 || H94487 || 119852	IMAGE:243202	-0.740884	-2.00017	2.69971	0.16238	0.823215	1	1q31
	600	SULF1 || Sulfatase 1 || Hs.409602 || AI653116 || 312399	IMAGE:2308409	-0.736275	-2.05295	2.78829	0.20505	0.823215	8	8q13.2-q13.3
	885	STK17B || Serine/threonine kinase 17b (apoptosis-inducing) || Hs.88297 || AA419485 || 113075	IMAGE:746148	-0.728004	-1.64558	2.2604	0.30142	0.823215
	1169	TEAD2 || TEA domain family member 2 || Hs.515534 || AA669124 || 223412	IMAGE:854570	-0.72639	-1.59784	2.1997	0.32388	0.823215	19	19q13.3
	176	CGN || Cingulin || Hs.18376 || N70196 || 118451	IMAGE:296444	-0.72309	-1.74604	2.41469	0.31356	0.823215	1	1q21
	699	INHBA || Inhibin, beta A (activin A, activin AB alpha polypeptide) || Hs.28792 || N27159 || 102234	IMAGE:269815	-0.722031	-1.77851	2.46321	0.20694	0.823215	7	7p15-p13
	1487	C1orf24 || Chromosome 1 open reading frame 24 || Hs.518662 || AA886758 || 226503	IMAGE:1500241	-0.720721	-1.72339	2.39121	0.25369	0.823215	1	1q25
	1241	TCIRG1 || T-cell, immune regulator 1, ATPase, H+ transporting, lysosomal V0 protein a isoform 3 || Hs.495985 || AI359884 || 308536	IMAGE:2015083	-0.716808	-1.74599	2.43578	0.22916	0.823215	11	11q13.2
	657	|| || || AA054073 || 117789	IMAGE:509823	-0.716666	-2.13709	2.98199	0.23059	0.823215	19	19q13.2
	803	|| || || AA076645 || 99209	IMAGE:526184	-0.715337	-1.75772	2.4572	0.29516	0.823215
	89	HMGA1 || High mobility group AT-hook 1 || Hs.518805 || AA448261 || 109301	IMAGE:782811	-0.704856	-1.66697	2.36498	0.25448	0.823215	6	6p21
	566	CDH11 || Cadherin 11, type 2, OB-cadherin (osteoblast) || Hs.116471 || AI278518 || 313617	IMAGE:1893136	-0.699288	-1.80159	2.57632	0.24401	0.823215	16
	1226	TRAF5 || TNF receptor-associated factor 5 || Hs.523930 || AA101279 || 101664	IMAGE:563621	-0.698633	-1.59874	2.28838	0.30722	0.823215	1	1q32
	548	|| || || R48843 || 223310	IMAGE:153646	-0.692246	-2.01155	2.90584	0.14830	0.920701	17	17q21.33
	759	NBL1 || Neuroblastoma, suppression of tumorigenicity 1 || Hs.439671 || AA598830 || 103873	IMAGE:898305	-0.679799	-1.69707	2.49642	0.26136	0.920701		1p36.13-p36.11
	139	CLDN4 || Claudin 4 || Hs.520942 || AA427468 || 100288	IMAGE:770388	-0.672395	-1.69896	2.52673	0.26310	0.920701	7	7q11.23
	1322	GMNN || Geminin, DNA replication inhibitor || Hs.234896 || AA447662 || 115042	IMAGE:813586	-0.664045	-1.70987	2.57493	0.23098	0.920701	6	6p22.2
	357	|| || || AI299356 || 311196	IMAGE:1895357	-0.664007	-1.48934	2.24296	0.33323	0.920701	X	Xq21.3-q22
	546	CTHRC1 || Collagen triple helix repeat containing 1 || Hs.405614 || AA406425 || 220604	IMAGE:753428	-0.66131	-1.83096	2.76869	0.21655	0.920701	8	8q22.3
	113	HSD11B2 || Hydroxysteroid (11-beta) dehydrogenase 2 || Hs.1376 || W95082 || 99098	IMAGE:415145	-0.660211	-1.5855	2.4015	0.30337	0.920701	16	16q22
	785	COPEB || Core promoter element binding protein || Hs.285313 || AA013481 || 108645	IMAGE:360436	-0.65958	-1.55157	2.35235	0.33048	0.920701	10	10p15
	135	LOC57228 || Hypothetical protein from clone 643 || Hs.206501 || T53403 || 119667	IMAGE:68794	-0.651086	-1.55432	2.38727	0.29416	0.920701		12q13.13
	97	CLDN23 || Claudin 23 || Hs.183617 || N92699 || 114926	IMAGE:306420	-0.649244	-1.55353	2.39282	0.29274	0.920701	8	8p23.1
	173	SCNN1A || Sodium channel, nonvoltage-gated 1 alpha || Hs.130989 || AA458982 || 114678	IMAGE:810873	-0.648245	-1.61383	2.48953	0.32949	0.920701	12	12p13
	738	HTRA3 || Serine protease HTRA3 || Hs.479119 || AA428183 || 222278	IMAGE:773558	-0.647994	-1.66591	2.57086	0.27656	0.920701	4	4p16.1
	567	COL6A3 || Collagen, type VI, alpha 3 || Hs.233240 || R62603 || 105228	IMAGE:138991	-0.644814	-1.69653	2.63103	0.25153	0.920701	2	2q37
	864	KIAA1363 || KIAA1363 protein || Hs.444099 || AI085559 || 315816	IMAGE:1670954	-0.640355	-1.48711	2.32231	0.30428	0.920701	3	3q26.31
	654	SLC2A1 || Solute carrier family 2 (facilitated glucose transporter), member 1 || Hs.473721 || H58872 || 102645	IMAGE:207358	-0.639773	-1.6953	2.64985	0.19550	0.920701	1	1p35-p31.3
	623	GJB2 || Gap junction protein, beta 2, 26kDa (connexin 26) || Hs.524894 || AA490466 || 100605	IMAGE:823859	-0.638415	-1.63014	2.55342	0.26522	0.920701	13	13q11-q12
	700	LOXL2 || Lysyl oxidase-like 2 || Hs.116479 || AA676458 || 114413	IMAGE:882506	-0.615855	-1.50467	2.44322	0.27780	1.01779		8p21.3-p21.2
	640	S100A11 || S100 calcium binding protein A11 (calgizzarin) || Hs.417004 || AA464731 || 119990	IMAGE:810612	-0.612529	-1.52173	2.48435	0.27917	1.01779	1	1q21
	636	PLAUR || Plasminogen activator, urokinase receptor || Hs.466871 || AA454879 || 107648	IMAGE:810017	-0.612186	-1.5877	2.59349	0.22227	1.01779	19	19q13
	1434	BTG2 || BTG family, member 2 || Hs.519162 || H69582 || 118118	IMAGE:213136	-0.61003	-1.56242	2.56122	0.22532	1.01779	1	1q32
	576	OLFML2B || Olfactomedin-like 2B || Hs.507515 || N25353 || 119752	IMAGE:265694	-0.601283	-1.59138	2.64664	0.28207	1.01779	1	1q23.3
	140	CLDN4 || Claudin 4 || Hs.520942 || AA863314 || 220433	IMAGE:1456776	-0.598201	-1.58478	2.64924	0.26808	1.01779	7	7q11.23
	1431	SGK || Serum/glucocorticoid regulated kinase || Hs.296323 || AA486082 || 112991	IMAGE:840776	-0.596984	-1.4392	2.41078	0.32269	1.01779	6	6q23
	13	IQGAP1 || IQ motif containing GTPase activating protein 1 || Hs.430551 || AA478633 || 309388	IMAGE:754149	-0.591981	-1.41857	2.3963	0.32959	1.01779	15	15q26.1
	593	COL5A1 || Collagen, type V, alpha 1 || Hs.210283 || R75635 || 118366	IMAGE:143523	-0.589571	-1.43172	2.42841	0.30312	1.01779
	643	S100A10 || S100 calcium binding protein A10 (annexin II ligand, calpactin I, light polypeptide (p11)) || Hs.143873 || AA444051 || 119597	IMAGE:756595	-0.588874	-1.43445	2.43591	0.31057	1.01779	1	1q21
	424	BASP1 || Brain abundant, membrane attached signal protein 1 || Hs.201641 || AA488676 || 114548	IMAGE:843098	-0.588302	-1.46397	2.48847	0.27915	1.01779	5	5p15.1-p14
	77	CA2 || Carbonic anhydrase II || Hs.155097 || H23187 || 102388	IMAGE:51865	-0.585097	-1.49329	2.55221	0.24989	1.01779	8	8q22
	568	COL12A1 || Collagen, type XII, alpha 1 || Hs.101302 || AA478481 || 107265	IMAGE:786609	-0.584017	-1.54484	2.6452	0.26565	1.01779	6	6q12-q13
	1206	VCAM1 || Vascular cell adhesion molecule 1 || Hs.109225 || H16591 || 104652	IMAGE:49164	-0.569919	-1.52205	2.67065	0.27604	1.28686	1	1p32-p31
	1334	PRSS3 || Protease, serine, 3 (mesotrypsin) || Hs.435699 || AI308916 || 307826	IMAGE:1913366	-0.563578	-1.93145	3.42712	0.32241	1.28686	9	9p11.2
	647	IFI27 || Interferon, alpha-inducible protein 27 || Hs.532634 || AA157813 || 102169	IMAGE:588915	-0.562143	-1.475	2.62389	0.22864	1.28686	14	14q32
	709	PLAT || Plasminogen activator, tissue || Hs.491582 || AA453728 || 114914	IMAGE:813841	-0.56187	-1.46395	2.60549	0.32937	1.28686	8	8p12
	560	|| Transcribed locus || Hs.501948 || AI822135 || 102652	IMAGE:299272	-0.561333	-1.43237	2.55173	0.30923	1.28686	11
	658	MMP14 || Matrix metalloproteinase 14 (membrane-inserted) || Hs.2399 || N33214 || 101816	IMAGE:270505	-0.560756	-1.48653	2.65093	0.23447	1.28686	14	14q11-q12
	634	TMSB10 || Thymosin, beta 10 || Hs.446574 || AA486085 || 106666	IMAGE:840788	-0.551588	-1.32664	2.40514	0.33242	1.28686	2	2p11.2
	604	PLAU || Plasminogen activator, urokinase || Hs.77274 || AA284668 || 110389	IMAGE:714106	-0.551185	-1.36118	2.46956	0.31393	1.28686	10	10q24
	628	PLEC1 || Plectin 1, intermediate filament binding protein 500kDa || Hs.434248 || AA448400 || 107211	IMAGE:781362	-0.550778	-1.31514	2.38779	0.32641	1.28686	8	8q24
	1205	CHI3L1 || Chitinase 3-like 1 (cartilage glycoprotein-39) || Hs.382202 || AA434048 || 107178	IMAGE:770212	-0.544423	-1.38014	2.53506	0.28159	1.42319	1	1q32.1
	98	TM4SF3 || Transmembrane 4 superfamily member 3 || Hs.170563 || AA045698 || 104425	IMAGE:509731	-0.544015	-1.44001	2.64701	0.32011	1.42319	12	12q14.1-q21.1
	507	SLC16A3 || Solute carrier family 16 (monocarboxylic acid transporters), member 3 || Hs.500761 || AA129777 || 100686	IMAGE:502151	-0.536126	-1.41538	2.64001	0.26036	1.42319	17	17q25
	550	COL5A2 || Collagen, type V, alpha 2 || Hs.445827 || AA857098 || 309448	IMAGE:1434897	-0.533428	-1.45758	2.73248	0.23784	1.54637
	667	KRT6B || Keratin 6B || Hs.524438 || AA936779 || 223111	IMAGE:1486118	-0.53332	-1.37891	2.58552	0.23902	1.54637	12	12q12-q13
	553	COL1A2 || Collagen, type I, alpha 2 || Hs.489142 || AA490172 || 105119	IMAGE:839991	-0.528364	-1.53721	2.90938	0.23182	1.54637	7	7q22.1
	563	CSPG2 || Chondroitin sulfate proteoglycan 2 (versican) || Hs.443681 || T99175 || 226840	IMAGE:122321	-0.52014	-1.43107	2.75131	0.31184	1.54637	5	5q14.3
	1315	MTAC2D1 || Membrane targeting (tandem) C2 domain containing 1 || Hs.510262 || W60473 || 115007	IMAGE:339179	-0.516574	-1.27433	2.46689	0.33226	2.10672	14	14q32.12
	1332	|| || || H97792 || 163427	IMAGE:251047	-0.50991	-1.52204	2.98492	0.33175	2.10672	12	12q24.3
	551	|| || || AA461456 || 119133	IMAGE:796613	-0.494846	-1.32683	2.6813	0.27479	2.10672
	648	|| || || R27011 || 245567	IMAGE:132711	-0.490384	-1.23197	2.51226	0.33075	2.10672	13	13q22.1
	669	LY6E || Lymphocyte antigen 6 complex, locus E || Hs.521903 || AA865464 || 105624	IMAGE:1470048	-0.484539	-1.22586	2.52994	0.31047	2.35699	8	8q24.3
	330	MMP9 || Matrix metalloproteinase 9 (gelatinase B, 92kDa gelatinase, 92kDa type IV collagenase) || Hs.297413 || T64837 || 98988	IMAGE:22040	-0.478274	-1.19033	2.4888	0.25568	2.35699	20	20q11.2-q13.1
	677	ECM1 || Extracellular matrix protein 1 || Hs.81071 || N79484 || 116682	IMAGE:301122	-0.455303	-1.13312	2.48871	0.32271	2.8855	1	1q21
	1486	VDAC2 || Voltage-dependent anion channel 2 || Hs.355927 || AA857093 || 118357	IMAGE:1434908	-0.447004	-1.11184	2.48732	0.26444	2.8855	10	10q22
	558	SPARC || Secreted protein, acidic, cysteine-rich (osteonectin) || Hs.111779 || H95959 || 115502	IMAGE:250654	-0.445741	-1.20792	2.70992	0.31921	2.8855	5	5q31.3-q32
	629	CRABP2 || Cellular retinoic acid binding protein 2 || Hs.405662 || AA598508 || 102191	IMAGE:897770	-0.440284	-1.11061	2.52247	0.33018	2.8855	1	1q21.3
	1299	DKFZp547K1113 || Hypothetical protein DKFZp547K1113 || Hs.459311 || AI624998 || 311486	IMAGE:2236882	-0.391157	-0.985887	2.52043	0.30826	3.15777	15	15q26.1
	542	FN1 || Fibronectin 1 || Hs.203717 || AI262682 || 109983	IMAGE:1870935	-0.357551	-1.03284	2.88865	0.22725	3.25128
	556	COL3A1 || Collagen, type III, alpha 1 (Ehlers-Danlos syndrome type IV, autosomal dominant) || Hs.443625 || T98611 || 108262	IMAGE:122159	-0.342526	-0.989763	2.8896	0.29918	3.25128	2	2q31
	728	CEACAM5 || Carcinoembryonic antigen-related cell adhesion molecule 5 || Hs.220529 || AA130547 || 102729	IMAGE:586706	-0.309169	-0.839	2.71373	0.28198	3.49866	19	19q13.1-q13.2

## Sheet: 3. Annot. SAM_Islet Tumor
Annotation for genes with enhanced expression in islet cell tumors compared to other pancreatic tissues as determined by significance analysis of microarrays
CloneID	Symbol	Name	UGCluster	Summary Function	Subcellular Location
IMAGE:1573778	C11orf13	Chromosome 11 open reading frame 13	Hs.72925
IMAGE:174627	SCG2	Secretogranin II (chromogranin C)	Hs.516726	The protein encoded by this gene is a member of the chromogranin/secretogranin family of neuroendocrine secretory proteins. Studies in rodents suggest that the full length protein, secretogranin II, is involved in the packaging or sorting of peptide hormones and neuropeptides into secretory vesicles. The full length protein is cleaved to produce the active peptide secretoneurin, which exerts chem…	neuroendocrine and endocrine secretory granules.
IMAGE:24254	PCSK2	Proprotein convertase subtilisin/kexin type 2	Hs.315186	The protein encoded by this gene belongs to the subtilisin-like proprotein convertase family. The members of this family are proprotein convertases that process latent precursor proteins into their biologically active products. This encoded protein is a proinsulin-processing enzyme that plays a key role in regulating insulin biosynthesis. It is also known to cleave proopiomelanocortin, proenkepha…	localized in the secretion granules.
IMAGE:84713	FGB	Fibrinogen, B beta polypeptide	Hs.300774	The protein encoded by this gene is the beta component of fibrinogen, a blood-borne glycoprotein comprised of three pairs of nonidentical polypeptide chains. Following vascular injury, fibrinogen is cleaved by thrombin to form fibrin which is the most abundant component of blood clots. In addition, various cleavage products of fibrinogen and fibrin regulate cell adhesion and spreading, display va…
IMAGE:2018758	PEX7	Peroxisomal biogenesis factor 7	Hs.280932		peroxisomal and cytoplasmic.
IMAGE:294578			In multiple clusters
IMAGE:711918	QPCT	Glutaminyl-peptide cyclotransferase (glutaminyl cyclase)	Hs.79033	This gene encodes human pituitary glutaminyl cyclase, which is responsible for the presence of pyroglutamyl residues in many neuroendocrine peptides. The amino acid sequence of this enzyme is 86% identical to that of bovine glutaminyl cyclase.
IMAGE:878836			Data not found
IMAGE:123561			Data not found
IMAGE:77193	MAFB	V-maf musculoaponeurotic fibrosarcoma oncogene homolog B (avian)	Hs.169487	The protein encoded by this gene is a basic leucine zipper (bZIP) transcription factor that plays an important role in the regulation of lineage-specific hematopoiesis. The encoded nuclear protein represses ETS1-mediated transcription of erythroid-specific genes in myeloid cells. This gene contains no introns.	nuclear (by similarity).
IMAGE:561851	DKFZP564O0823	DKFZP564O0823 protein	Hs.105460
IMAGE:341706	BEX1	Brain expressed, X-linked 1	Hs.334370
IMAGE:563444	GNAS	GNAS complex locus	Hs.125898	This gene has a highly complex imprinted expression pattern. It encodes maternally, paternally, and biallelically expressed proteins which are derived from alternatively spliced transcripts with alternate 5' exons. Each of the upstream exons is within a differentially methylated region, commonly found in imprinted genes. However, the close proximity (14 kb) of two oppositely expressed promoter re…
IMAGE:22895	INSM1	Insulinoma-associated 1	Hs.89584	Insulinoma-associated 1 (INSM1) gene is intronless and encodes a protein containing both a zinc finger DNA-binding domain and a putative prohormone domain. This gene is a sensitive marker for neuroendocrine differentiation of human lung tumors.	nuclear (potential).
IMAGE:812968	PTPRN2	Protein tyrosine phosphatase, receptor type, N polypeptide 2	Hs.490789	The protein encoded by this gene is a member of the protein tyrosine phosphatase (PTP) family. PTPs are known to be signaling molecules that regulate a variety of cellular processes including cell growth, differentiation, mitotic cycle, and oncogenic transformation. This PTP possesses an extracellular region, a single transmembrane region, and a single intracellular catalytic domain, and thus rep…	type i membrane protein (probable).
IMAGE:213871	GNAS	GNAS complex locus	Hs.125898	This gene has a highly complex imprinted expression pattern. It encodes maternally, paternally, and biallelically expressed proteins which are derived from alternatively spliced transcripts with alternate 5' exons. Each of the upstream exons is within a differentially methylated region, commonly found in imprinted genes. However, the close proximity (14 kb) of two oppositely expressed promoter re…
IMAGE:282956	TRIM21	Tripartite motif-containing 21	Hs.532357	The protein encoded by this gene is a member of the tripartite motif (TRIM) family. The TRIM motif includes three zinc-binding domains, a RING, a B-box type 1 and a B-box type 2, and a coiled-coil region. This protein is part of the RoSSA ribonucleoprotein which includes a single polypeptide and one of four small RNA molecules. The RoSSA particle localizes to both the cytoplasm and the nucleus. R…
IMAGE:2017947	HMX1	Homeo box (H6 family) 1	Hs.104134
IMAGE:855624	ALDH1A1	Aldehyde dehydrogenase 1 family, member A1	Hs.76392	This protein belongs to the aldehyde dehydrogenases family of proteins. Aldehyde dehydrogenase is the second enzyme of the major oxidative pathway of alcohol metabolism. Two major liver isoforms of this enzyme, cytosolic and mitochondrial, can be distinguished by their electrophoretic mobilities, kinetic properties, and subcellular localizations. Most Caucasians have two major isozymes, while app…	cytoplasmic.
IMAGE:1699281	TUSC3	Tumor suppressor candidate 3	Hs.426324	This gene is a candidate tumor suppressor gene. It is located within a homozygously deleted region of a metastatic prostate cancer. The gene is expressed in most nonlymphoid human tissues including prostate, lung, liver, and colon. Expression was also detected in many epithelial tumor cell lines. Two transcript variants encoding distinct isoforms have been identified for this gene.
IMAGE:2014138	ACSL1	Acyl-CoA synthetase long-chain family member 1	Hs.406678	The protein encoded by this gene is an isozyme of the long-chain fatty-acid-coenzyme A ligase family. Although differing in substrate specificity, subcellular localization, and tissue distribution, all isozymes of this family convert free long-chain fatty acids into fatty acyl-CoA esters, and thereby play a key role in lipid biosynthesis and fatty acid degradation.
IMAGE:322123	TTC8	Tetratricopeptide repeat domain 8	Hs.303055	This gene encodes a protein that has been directly linked to Bardet-Biedl syndrome. The primary features of this syndrome include retinal dystrophy, obesity, polydactyly, renal abnormalities and learning disabilities. Experimentation in non-human eukaryotes suggests that this gene is expressed in ciliated cells and that it is involved in the formation of cilia. Alternate transcriptional splice va…
IMAGE:82734	ACSL1	Acyl-CoA synthetase long-chain family member 1	Hs.406678	The protein encoded by this gene is an isozyme of the long-chain fatty-acid-coenzyme A ligase family. Although differing in substrate specificity, subcellular localization, and tissue distribution, all isozymes of this family convert free long-chain fatty acids into fatty acyl-CoA esters, and thereby play a key role in lipid biosynthesis and fatty acid degradation.
IMAGE:196005	AQP3	Aquaporin 3	Hs.234642	Aquaporin 3 is a water channel protein. Aquaporins are a family of small integral membrane proteins related to the major intrinsic protein (MIP or AQP0). Aquaporin 3 is localized at the basal lateral membranes of collecting duct cells in the kidney. In addition to its water channel function, aquaporin 3 has been found to facilitate the transport of nonionic small solutes such as urea and glycerol…	integral membrane protein. basolateral membrane in collecting ducts of kidney.
IMAGE:324386	GNAI1	Guanine nucleotide binding protein (G protein), alpha inhibiting activity polypeptide 1	Hs.134587
IMAGE:140806	PAM	Peptidylglycine alpha-amidating monooxygenase	Hs.369430	This gene encodes a multifunctional protein. It has two enzymatically active domains with catalytic activities - peptidylglycine alpha-hydroxylating monooxygenase (PHM) and peptidyl-alpha-hydroxyglycine alpha-amidating lyase (PAL). These catalytic domains work sequentially to catalyze neuroendocrine peptides to active alpha-amidated products. Multiple alternatively spliced transcript variants enc…	type i membrane protein (isoform 1 and isoform 2). secreted from secretory granules (isoform 3 and isoform 4).
IMAGE:417473	GNAS	GNAS complex locus	Hs.125898	This gene has a highly complex imprinted expression pattern. It encodes maternally, paternally, and biallelically expressed proteins which are derived from alternatively spliced transcripts with alternate 5' exons. Each of the upstream exons is within a differentially methylated region, commonly found in imprinted genes. However, the close proximity (14 kb) of two oppositely expressed promoter re…
IMAGE:23776	QDPR	Quinoid dihydropteridine reductase	Hs.75438	This gene encodes the enzyme dihydropteridine reductase, which catalyzes the NADH-mediated reduction of quinonoid dihydrobiopterin. This enzyme is an essential component of the pterin-dependent aromatic amino acid hydroxylating systems. Mutations in this gene resulting in QDPR deficiency include aberrant splicing, amino acid substitutions, insertions, or premature terminations. Dihydropteridine r…
IMAGE:1868551	TTR	Transthyretin (prealbumin, amyloidosis type I)	Hs.427202		secreted.
IMAGE:307471	TM4SF2	Tetraspanin 7	Hs.441664	The protein encoded by this gene is a member of the transmembrane 4 superfamily, also known as the tetraspanin family. Most of these members are cell-surface proteins that are characterized by the presence of four hydrophobic domains. The proteins mediate signal transduction events that play a role in the regulation of cell development, activation, growth and motility. This encoded protein is a c…	integral membrane protein.
IMAGE:882522	ASS	Argininosuccinate synthetase	Hs.160786	The protein encoded by this gene catalyzes the penultimate step of the arginine biosynthetic pathway. There are approximately 10 to 14 copies of this gene including the pseudogenes scattered across the human genome, among which the one located on chromosome 9 appears to be the only functional gene for argininosuccinate synthetase. Mutations in the chromosome 9 copy of ASS cause citrullinemia. Two…
IMAGE:291097	FKBP11	FK506 binding protein 11, 19 kDa	Hs.438695
IMAGE:346027	GLS	Glutaminase	Hs.116448	Sahai (1983) demonstrated phosphate-activated glutaminase (EC 3.5.1.2) in human platelets. It is the major enzyme yielding glutamate from glutamine. Significance of the enzyme derives from its possible implication in behavior disturbances in which glutamate acts as a neurotransmitter (Prusiner, 1981). High heritability of platelet glutaminase was indicated by studies of Sahai and Vogel (1983) who…
IMAGE:79935			Data not found
IMAGE:731073	NAT5	N-acetyltransferase 5 (ARD1 homolog, S. cerevisiae)	Hs.368783
IMAGE:131452			In multiple clusters
IMAGE:882461	ASS	Argininosuccinate synthetase	Hs.160786	The protein encoded by this gene catalyzes the penultimate step of the arginine biosynthetic pathway. There are approximately 10 to 14 copies of this gene including the pseudogenes scattered across the human genome, among which the one located on chromosome 9 appears to be the only functional gene for argininosuccinate synthetase. Mutations in the chromosome 9 copy of ASS cause citrullinemia. Two…
IMAGE:81518	OCRL	Oculocerebrorenal syndrome of Lowe	Hs.126357	This gene encodes a phosphatase enzyme that is involved in actin polymerization and is found in the trans-Golgi network. Mutations in this gene cause oculocerebrorenal syndrome of Lowe and also Dent disease.
IMAGE:49937	SEZ6L	Seizure related 6 homolog (mouse)-like	Hs.194766
IMAGE:395794			Data not found
IMAGE:325606	TXNL5	Thioredoxin-like 5	Hs.408236
IMAGE:897667	SMARCA1	SWI/SNF related, matrix associated, actin dependent regulator of chromatin, subfamily a, member 1	Hs.152292	The protein encoded by this gene is a member of the SWI/SNF family of proteins. Members of this family have helicase and ATPase activities and are thought to regulate transcription of certain genes by altering the chromatin structure around those genes. Two transcript variants encoding different isoforms have been found for this gene.	nuclear.
IMAGE:359933	GNAS	GNAS complex locus	Hs.125898	This gene has a highly complex imprinted expression pattern. It encodes maternally, paternally, and biallelically expressed proteins which are derived from alternatively spliced transcripts with alternate 5' exons. Each of the upstream exons is within a differentially methylated region, commonly found in imprinted genes. However, the close proximity (14 kb) of two oppositely expressed promoter re…
IMAGE:210919		Transcribed locus, strongly similar to NP_060011.1 crystallin, gamma S; crystallin, gamma 8 [Homo sapiens]	Hs.497253
IMAGE:234559	TM4SF4	Transmembrane 4 L six family member 4	Hs.133527	The protein encoded by this gene is a member of the transmembrane 4 superfamily, also known as the tetraspanin family. Most of these members are cell-surface proteins that are characterized by the presence of four hydrophobic domains. The proteins mediate signal transduction events that play a role in the regulation of cell development, activation, growth and motility. This encoded protein is a c…	integral membrane protein.
IMAGE:79817	WDR7	WD repeat domain 7	Hs.465213	This gene encodes a member of the WD repeat protein family. WD repeats are minimally conserved regions of approximately 40 amino acids typically bracketed by gly-his and trp-asp (GH-WD), which may facilitate formation of heterotrimeric or multiprotein complexes. Members of this family are involved in a variety of cellular processes, including cell cycle progression, signal transduction, apoptosis…
IMAGE:199367			Data not found
IMAGE:196012	GLS	Glutaminase	Hs.116448	Sahai (1983) demonstrated phosphate-activated glutaminase (EC 3.5.1.2) in human platelets. It is the major enzyme yielding glutamate from glutamine. Significance of the enzyme derives from its possible implication in behavior disturbances in which glutamate acts as a neurotransmitter (Prusiner, 1981). High heritability of platelet glutaminase was indicated by studies of Sahai and Vogel (1983) who…
IMAGE:166805			Data not found
IMAGE:33267			Data not found
IMAGE:824552	CD99L2	CD99 antigen-like 2	Hs.522805
*mitoch. cont. IMAGE:1161030			Data not found
IMAGE:1155481	TUSC3	Tumor suppressor candidate 3	Hs.426324	This gene is a candidate tumor suppressor gene. It is located within a homozygously deleted region of a metastatic prostate cancer. The gene is expressed in most nonlymphoid human tissues including prostate, lung, liver, and colon. Expression was also detected in many epithelial tumor cell lines. Two transcript variants encoding distinct isoforms have been identified for this gene.
IMAGE:49318	AXL	AXL receptor tyrosine kinase	Hs.466791	The protein encoded by this gene is a member of the receptor tyrosine kinase subfamily. Although it is similar to other receptor tyrosine kinases, the Axl protein represents a unique structure of the extracellular region that juxtaposes IgL and FNIII repeats. It transduce signals from the extracellular matrix into the cytoplasm by binding growth factors like vitamin K-dependent protein growth-arr…	type i membrane protein.
IMAGE:725877			In multiple clusters
IMAGE:565249	LRP11	Low density lipoprotein receptor-related protein 11	Hs.408355
IMAGE:1129559	FBLN1	Fibulin 1	Hs.24601	Fibulin 1 is a secreted glycoprotein that becomes incorporated into a fibrillar extracellular matrix. Calcium-binding is apparently required to mediate its binding to laminin and nidogen. It mediates platelet adhesion via binding fibrinogen. Four splice variants which differ in the 3' end have been identified. Each variant encodes a different isoform, but no functional distinctions have been iden…	secreted; extracellular matrix.
IMAGE:825076			In multiple clusters
IMAGE:293859	TUSC3	Tumor suppressor candidate 3	Hs.426324	This gene is a candidate tumor suppressor gene. It is located within a homozygously deleted region of a metastatic prostate cancer. The gene is expressed in most nonlymphoid human tissues including prostate, lung, liver, and colon. Expression was also detected in many epithelial tumor cell lines. Two transcript variants encoding distinct isoforms have been identified for this gene.
IMAGE:855523	GPX3	Glutathione peroxidase 3 (plasma)	Hs.386793	Glutathione peroxidase catalyzes the reduction of hydrogen peroxide, organic hydroperoxide, and lipid peroxides by reduced glutathione and functions in the protection of cells against oxidative damage. Human plasma glutathione peroxidase has been shown to be a selenium-containing enzyme. GPX3 expression appears to be tissue-specific.	secreted.
IMAGE:144801	CALM1	Calmodulin 1 (phosphorylase kinase, delta)	Hs.282410	Calmodulin is the archetype of the family of calcium-modulated proteins of which nearly 20 members have been found. They are identified by their occurrence in the cytosol or on membranes facing the cytosol and by a high affinity for calcium. Calmodulin contains 149 amino acids and has 4 calcium-binding domains. Its functions include roles in growth and the cell cycle as well as in signal transduc…
IMAGE:209756	SAP18	Sin3-associated polypeptide, 18kDa	Hs.524899	Histone acetylation plays a key role in the regulation of eukaryotic gene expression. Histone acetylation and deacetylation are catalyzed by multisubunit complexes. The protein encoded by this gene is a component of the histone deacetylase complex which includes SIN3, SAP30, HDAC1, HDAC2, RbAp46, RbAp48 and other polypeptides. This protein directly interacts with SIN3 and enhances SIN3-mediated t…
IMAGE:2017513	GARNL4	GTPase activating Rap/RanGAP domain-like 4	Hs.499659
IMAGE:246722	SERPINE2	Serine (or cysteine) proteinase inhibitor, clade E (nexin, plasminogen activator inhibitor type 1), member 2	Hs.38449		extracellular.
IMAGE:788566	PCP4	Purkinje cell protein 4	Hs.80296
*mitoch. cont. IMAGE:916749			Data not found
IMAGE:784000	FLJ10769	Hypothetical protein FLJ10769	Hs.408324
IMAGE:753215	GNAI1	Guanine nucleotide binding protein (G protein), alpha inhibiting activity polypeptide 1	Hs.134587
*mitoch. cont. IMAGE:1590916			Data not found
IMAGE:730439	SLC25A29	Solute carrier family 25, member 29	Hs.497598
*mitoch. cont. IMAGE:502634			Data not found
*mitoch. cont. IMAGE:770969			Data not found
IMAGE:301995		CDNA clone IMAGE:5925561, partial cds	Hs.519138
IMAGE:951327	TMED8	Transmembrane emp24 domain containing 8	Hs.547416
IMAGE:78946	PDK4	Pyruvate dehydrogenase kinase, isoenzyme 4	Hs.8364		mitochondrial matrix.
IMAGE:1535596	RDH11	DKFZP564M1462 protein	Hs.226007	RHD11, a member of the short-chain dehydrogenase/reductase (SDR) superfamily of oxidoreductases, is expressed at high levels in prostate epithelium, and its expression is regulated by androgens.[supplied by OMIM]
IMAGE:1635359	RASD1	RAS, dexamethasone-induced 1	Hs.25829	This gene encodes a Ras-related protein that is stimulated by dexamethasone. The exact function of this gene is unknown, but it may play a role in dexamethasone-induced alterations in cell morphology, growth and cell-extracellular matrix interactions. In addition, studies of a similar rat protein suggest that it functions as as a novel physiologic nitric oxide (NO) effector. The gene product belo…
*mitoch. cont. IMAGE:1574720			Data not found
IMAGE:429555	FGA	Fibrinogen, A alpha polypeptide	Hs.351593	The protein encoded by this gene is the alpha component of fibrinogen, a blood-borne glycoprotein comprised of three pairs of nonidentical polypeptide chains. Following vascular injury, fibrinogen is cleaved by thrombin to form fibrin which is the most abundant component of blood clots. In addition, various cleavage products of fibrinogen and fibrin regulate cell adhesion and spreading, display v…
IMAGE:767268	DPP7	Dipeptidylpeptidase 7	Hs.37916	The protein encoded by this gene is a post-proline cleaving aminopeptidase expressed in quiescent lymphocytes. The resting lymphocytes are maintained through suppression of apoptosis, a state which is disrupted by inhibition of this novel serine protease. The enzyme has strong sequence homology with prolylcarboxypeptidase and is active at both acidic and neutral pH.
*mitoch. cont. IMAGE:725914			Data not found
*mitoch. cont. IMAGE:1610469			Data not found
IMAGE:878640	HMGB3	High-mobility group box 3	Hs.19114		nuclear (by similarity).
IMAGE:151240			Data not found
IMAGE:197450	CALD1	Caldesmon 1	Hs.490203	This gene encodes a calmodulin- and actin-binding protein that plays an essential role in the regulation of smooth muscle and nonmuscle contraction. The conserved domain of this protein possesses the binding activities to Ca(2+)-calmodulin, actin, tropomyosin, myosin, and phospholipids. This protein is a potent inhibitor of the actin-tropomyosin activated myosin MgATPase, and serves as a mediatin…	on thin filaments in smooth muscle and on stress fibers in fibroblasts (nonmuscle) (by similarity).
*mitoch. cont. IMAGE:1425266			Data not found
IMAGE:1535070	GLS	Glutaminase	Hs.116448	Sahai (1983) demonstrated phosphate-activated glutaminase (EC 3.5.1.2) in human platelets. It is the major enzyme yielding glutamate from glutamine. Significance of the enzyme derives from its possible implication in behavior disturbances in which glutamate acts as a neurotransmitter (Prusiner, 1981). High heritability of platelet glutaminase was indicated by studies of Sahai and Vogel (1983) who…
IMAGE:461761	RNASE4	Angiogenin, ribonuclease, RNase A family, 5	Hs.283749	The protein encoded by this gene belongs to the pancreatic ribonuclease family. It plays an important role in mRNA cleavage and has marked specificity towards the 3' side of uridine nucleotides. Alternative splicing occurs at this locus and three transcript variants encoding the same protein have been identified. This gene and ANG share two exons in their 5' UTRs. The downstream exons are unique …	secreted.
IMAGE:757173	NDFIP1	Nedd4 family interacting protein 1	Hs.9788	The protein encoded by this gene belongs to a small group of evolutionarily conserved proteins with three transmembrane domains. It is a potential target for ubiquitination by the Nedd4 family of proteins. This protein is thought to be part of a family of integral Golgi membrane proteins.
IMAGE:85840	NNMT	Nicotinamide N-methyltransferase	Hs.503911	N-methylation is one method by which drug and other xenobiotic compounds are metabolized by the liver. This gene encodes the protein responsible for this enzymatic activity which uses S-adenosyl methionine as the methyl donor.	cytoplasmic.
IMAGE:246430	UGT2B4	UDP glycosyltransferase 2 family, polypeptide B4	Hs.285887		microsomal.
IMAGE:1555659			Data not found
IMAGE:752802	SEZ6L2	Seizure related 6 homolog (mouse)-like 2	Hs.6314
IMAGE:108801	C14orf101	Chromosome 14 open reading frame 101	Hs.549170
IMAGE:199663	CCL15	Chemokine (C-C motif) ligand 14	Hs.272493	This gene, CCL15, is one of several CC cytokine genes clustered on 17q11.2. The CC cytokines are secreted proteins characterized by two adjacent cysteines. The cytokine encoded by this gene is chemotactic for T cells and monocytes and induces N-acetyl-beta-D-glucosaminidase release in monocytes. It induces changes in intracellular calcium concentration in monocytes and is thought to act through t…	secreted.
IMAGE:1492276	RNASE4	Angiogenin, ribonuclease, RNase A family, 5	Hs.283749	The protein encoded by this gene belongs to the pancreatic ribonuclease family. It plays an important role in mRNA cleavage and has marked specificity towards the 3' side of uridine nucleotides. Alternative splicing occurs at this locus and three transcript variants encoding the same protein have been identified. This gene and ANG share two exons in their 5' UTRs. The downstream exons are unique …	secreted.
*mitoch. cont. IMAGE:770935			Data not found
IMAGE:81417	RNASE4	Angiogenin, ribonuclease, RNase A family, 5	Hs.283749	The protein encoded by this gene belongs to the pancreatic ribonuclease family. It plays an important role in mRNA cleavage and has marked specificity towards the 3' side of uridine nucleotides. Alternative splicing occurs at this locus and three transcript variants encoding the same protein have been identified. This gene and ANG share two exons in their 5' UTRs. The downstream exons are unique …	secreted.
IMAGE:897590	GNAS	GNAS complex locus	Hs.125898	This gene has a highly complex imprinted expression pattern. It encodes maternally, paternally, and biallelically expressed proteins which are derived from alternatively spliced transcripts with alternate 5' exons. Each of the upstream exons is within a differentially methylated region, commonly found in imprinted genes. However, the close proximity (14 kb) of two oppositely expressed promoter re…
IMAGE:824108	SCAND1	SCAN domain containing 1	Hs.517008	The SCAN domain is a highly conserved, leucine-rich motif of approximately 60 aa originally found within a subfamily of zinc finger proteins. This gene belongs to a family of genes that encode an isolated SCAN domain, but no zinc finger motif. Functional studies have established that the SCAN box is a protein interaction domain that mediates both hetero- and homoprotein associations, and maybe in…	nuclear (potential).
IMAGE:307231	ADH1B	Alcohol dehydrogenase IB (class I), beta polypeptide	Hs.4	The protein encoded by this gene is a member of the alcohol dehydrogenase family. Members of this enzyme family metabolize a wide variety of substrates, including ethanol, retinol, other aliphatic alcohols, hydroxysteroids, and lipid peroxidation products. This encoded protein, consisting of several homo- and heterodimers of alpha, beta, and gamma subunits, exhibits high activity for ethanol oxid…	cytoplasmic.
IMAGE:1536240	HPS3	Hermansky-Pudlak syndrome 3	Hs.477898	This gene encodes a protein containing a potential clathrin-binding motif, consensus dileucine signals, and tyrosine-based sorting signals for targeting to vesicles of lysosomal lineage. The encoded protein may play a role in organelle biogenesis associated with melanosomes, platelet dense granules, and lysosomes. Mutations in this gene are associated with Hermansky-Pudlak syndrome type 3. Altern…	cytoplasmic (by similarity).
IMAGE:323806	CHD9	Chromodomain helicase DNA binding protein 9	Hs.530936
IMAGE:204541	ASGR1	Asialoglycoprotein receptor 1	Hs.12056	This cell surface receptor binds to galactose-terminated glycoproteins. It transports these glycoproteins via a series of membrane vesicles and tubules to an acidic-sorting organelle where the receptor and ligand dissociates. Then the receptor is recycled back to the cell surface.	type ii membrane protein.
IMAGE:1592021	CFH	Complement factor H	Hs.363396	This gene is a member of the Regulator of Complement Activation (RCA) gene cluster and encodes a protein with twenty short concensus repeat (SCR) domains. This protein is secreted into the bloodstream and has an essential role in the regulation of complement activation, restricting this innate defense mechanism to microbial infections. Mutations in this gene have been associated with hemolytic-ur…
