# Supplementary material for: Gene Expression Patterns in Pancreatic Tumors, Cells and Tissues
Source: PLoS One. 2007 Mar 28;2(3):e323. doi: 10.1371/journal.pone.0000323 (PMC1824711; doi:10.1371/journal.pone.0000323)
Supplement: Data S6 — Identification of candidate genes capable of discriminating pancreatic adenocarcinomas or islet cell tumors from a diverse collection of normal human tissues. Putative secretory or membrane proteins enriched in pancreatic adenocarcinomas or islet cell tumors in the current study were examined in the context of a wide variety of normal tissues reported in reference [9]. (0.05 MB XLS) [file pone.0000323.s006.xls]

## Sheet: Adenocarcinoma
Supplement 6
Prediction analysis of microarrays for 187 secretory and membrane proteins genes within the "Adeno" and Islet cell tumor clusters to discriminate adenocarcinomas within the context of gene expression data derived from a diverse collection of normal tissues. The identified genes are ranked in the order of their ability to discriminate.
			Training Confusion Matrix (Threshold=5.4)
		True\Predicted	AdenoCa	non-adeno	Class Error rate
		AdenoCa	31	0	0
		non-adeno	4	121	0.032
			List of Significant Genes for Threshold = 5.4
		Offset Quantile	50		Offset Value	1.25996
			both		RNG Seed	420473
				Prior Distribution (Sample Prior)
			Class	AdenoCa	non-adeno
			Prob.	0.198718	0.801282
Symbol	name	ID	AdenoCa score	non-adeno score
LAMC2	Laminin, gamma 2	IMAGE:460403	0.2931	-0.0727
CTSE	Cathepsin E	IMAGE:243202	0.2635	-0.0653
GPX2	Glutathione peroxidase 2 (gastrointestinal)	IMAGE:587847	0.2025	-0.0502
LGALS4	Lectin, galactoside-binding, soluble, 4 (galectin 4)	IMAGE:511068	0.1725	-0.0428
GPRC5A	G protein-coupled receptor, family C, group 5, member A	IMAGE:595037	0.1527	-0.0379
LGALS4	Lectin, galactoside-binding, soluble, 4 (galectin 4)	IMAGE:511045	0.152	-0.0377
MMP14	Matrix metallopeptidase 14 (membrane-inserted)	IMAGE:270505	0.1444	-0.0358
LGALS4	Lectin, galactoside-binding, soluble, 4 (galectin 4)	IMAGE:586685	0.1371	-0.034
ITGA2	Integrin, alpha 2 (CD49B, alpha 2 subunit of VLA-2 receptor)	IMAGE:525246	0.1094	-0.0271
AGR2	Anterior gradient 2 homolog (Xenopus laevis)	IMAGE:2321113	0.105	-0.026
COL17A1	Collagen, type XVII, alpha 1	IMAGE:252259	0.0788	-0.0195
TSPAN8	Tetraspanin 8	IMAGE:509731	0.074	-0.0184
GPRC5A	G protein-coupled receptor, family C, group 5, member A	IMAGE:1457276	0.0502	-0.0124
	Transcribed locus, strongly similar to NP_002194.1 integrin alpha 2 precursor; Integrin, alpha-2 (CD49B; alpha-2 subunit of VLA-2 receptor; platelet antigen Br)	IMAGE:1623955	0.0406	-0.0101
CEACAM7	Carcinoembryonic antigen-related cell adhesion molecule 7	IMAGE:509688	0.0397	-0.0098
ITGA2	Integrin, alpha 2 (CD49B, alpha 2 subunit of VLA-2 receptor)	IMAGE:811740	0.0109	-0.0027

## Sheet: Islet cell tumors
Supplement 6
Prediction analysis of microarrays for 187 secretory and membrane proteins genes within the "Adeno" and Islet cell tumor clusters to discriminate islet cell tumors within the context of gene expression data derived from a diverse collection of normal tissues. The identified genes are ranked in the order of their ability to discriminate.
							Training Confusion Matrix (Threshold=2.4)
					True\Predicted	islet tumor	non-islet	Class Error rate
					islet tumor	6	0	0
					non-islet	0	150	0
							Settings
					Offset Quantile	50		Offset Value	1.40321
						both		RNG Seed	420473
							Prior Distribution (Sample Prior)
						Class	islet tumor	non-islet
						Prob.	0.0384615	0.961538
Symbol	name	ID	islet tumor score	non-islet score
SCG2	Secretogranin II (chromogranin C)	IMAGE:174627	0.824	-0.033
RASSF7	Ras association (RalGDS/AF-6) domain family 7	IMAGE:1573778	0.6385	-0.0255
TTR	Transthyretin (prealbumin, amyloidosis type I)	IMAGE:1868551	0.6209	-0.0248
SGNE1	neuroendocrine protein 1 (putative)	IMAGE:878836	0.5798	-0.0232
INSM1	Insulinoma-associated 1	IMAGE:22895	0.5779	-0.0231
PCSK2	Proprotein convertase subtilisin/kexin type 2	IMAGE:24254	0.5653	-0.0226
QPCT	Glutaminyl-peptide cyclotransferase (glutaminyl cyclase)	IMAGE:711918	0.4956	-0.0198
FGB	**Fibrinogen beta chain	IMAGE:84713	0.4401	-0.0176
PEX7	Peroxisomal biogenesis factor 7	IMAGE:2018758	0.3837	-0.0153
PTPRN2	Protein tyrosine phosphatase, receptor type, N polypeptide 2	IMAGE:812968	0.3738	-0.015
SERPINA1	Serpin peptidase inhibitor, clade A (alpha-1 antiproteinase, antitrypsin), member 1	IMAGE:294578	0.3277	-0.0131
ARF3	ADP-ribosylation factor 3	IMAGE:291097	0.1796	-0.0072
